# Supplementary material for: A compendium of DNA-binding specificities of transcription factors in Pseudomonas syringae
Source: PubMed Central journal article supplement (PMC7532196; doi:10.1038/s41467-020-18744-7), 2020-10-02
Supplement: 41467_2020_18744_MOESM1_ESM.pdf [file 41467_2020_18744_MOESM1_ESM.pdf]

## Supplementary Information

### The Compendium of DNA-Binding Specificities of Transcription Factors in *Pseudomonas syringae*

Fan et al.

## **Supplementary Information**

Supplementary Figure 1. The schematic diagram of generating the input library for HT-SELEX, related to Fig. 1.

Supplementary Figure 2. Validation of different modes of TF binding, related to Fig. 2.

Supplementary Figure 3. Validation of PWM putative TF binding sites, related to Fig. 2.

Supplementary Table 1a. Family classification for TF based on DBD domain, related to Fig. 1.

Supplementary Table 1b. Strains, plasmids and primers used in this study, related to Fig. 1, Fig. 2.

Supplementary Table 1c. List of oligo sequences for building the HT-SELEX libraries used in the study, related to Fig. 1.

# Supplementary Figure 1

a

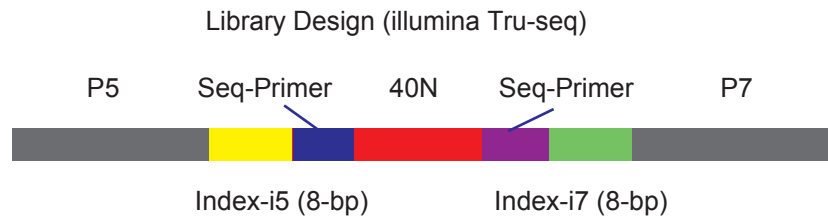

b

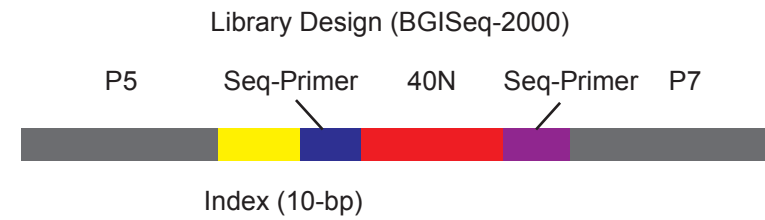

c

Input Generation Strategy (illumina Tru-seq)

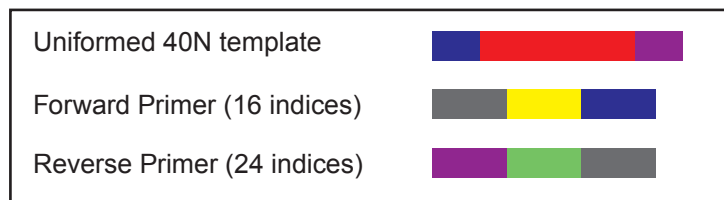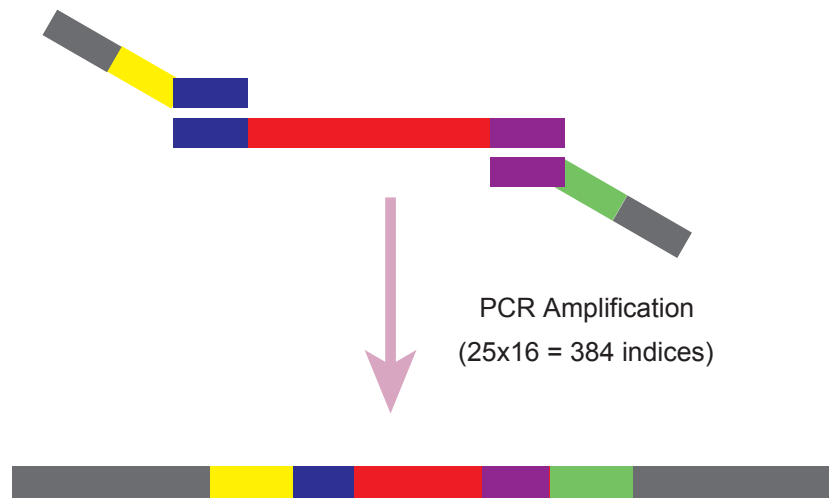

d

Input Generation Strategy (BGISeq-2000)

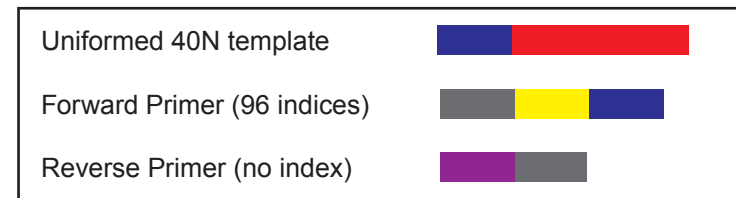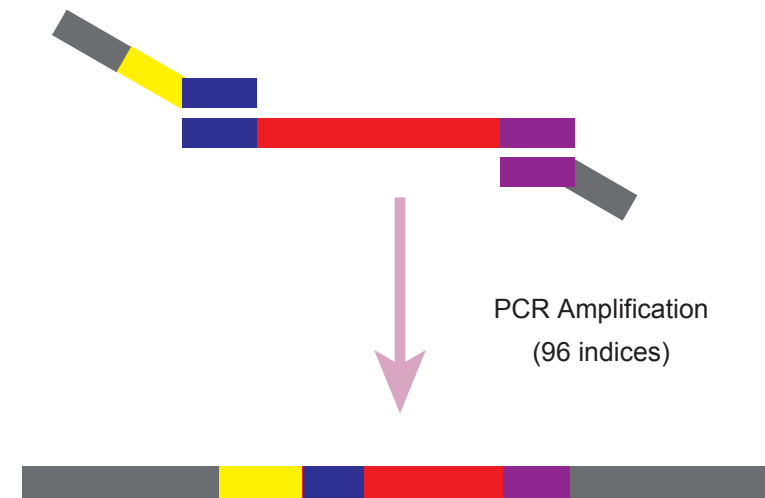

### **Supplementary figure legends**

#### **Supplementary Figure 1. The schematic diagram of generating the input library for HT-SELEX, related to Fig. 1.**

- (a) HT-SELEX input library design adapted to illumine Tru-seq system.
- (b) HT-SELEX input library design adapted to BGISEQ-2000 system.
- (c) The strategy to assemble illumina Tru-seq input library with 384 indices.
- (d) The strategy to assemble BGISEQ-2000 input library with 96 indices.

Forward and reverse primer sequences are shown in Supplementary Table 1c (c-d).

Supplementary Figure 2

a

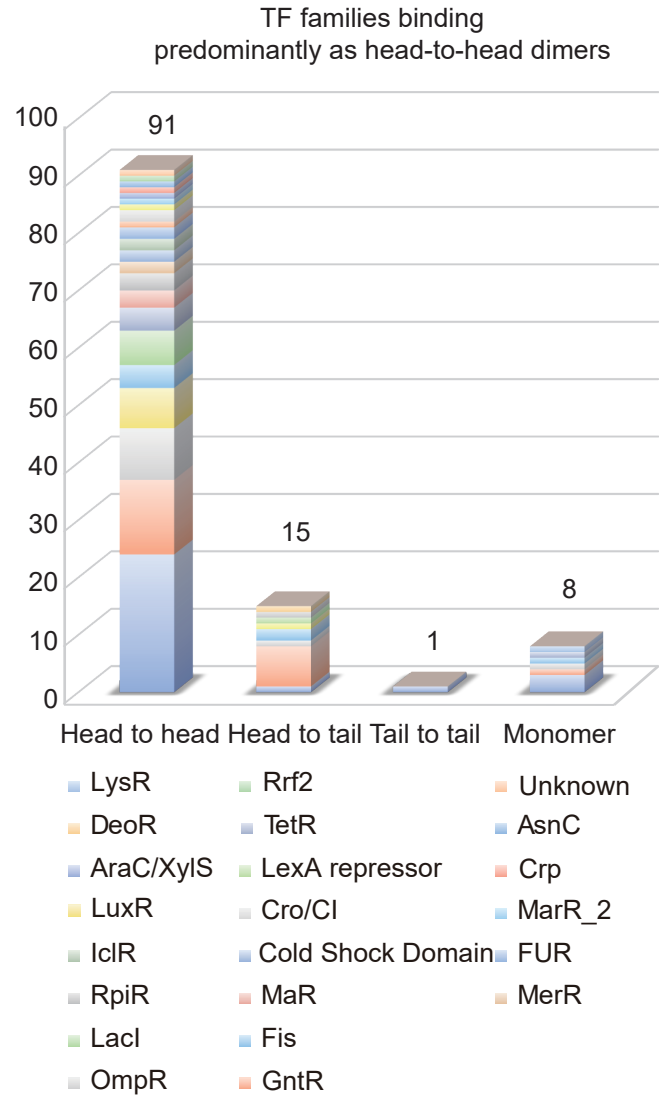

b

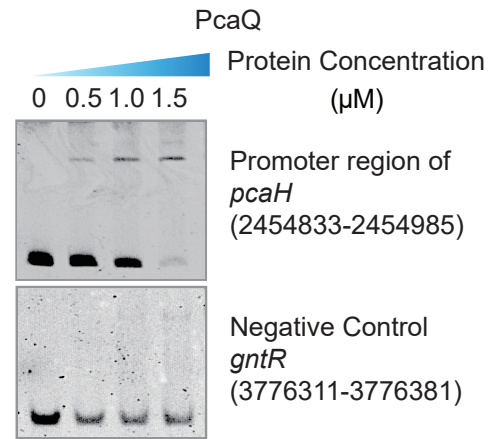

d

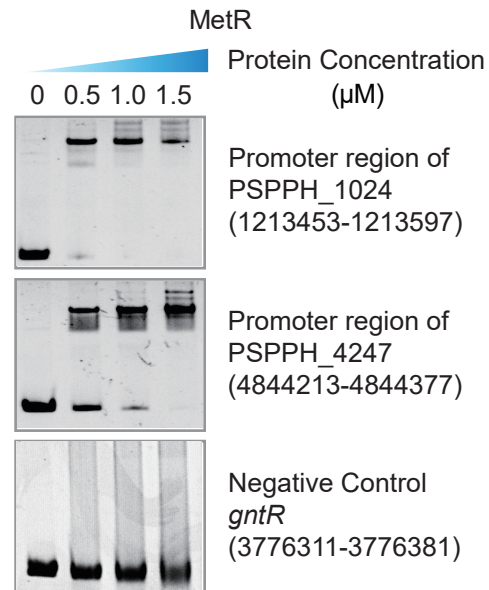

c

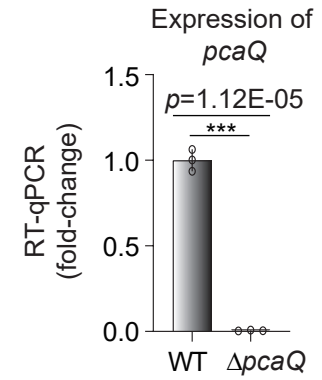

e

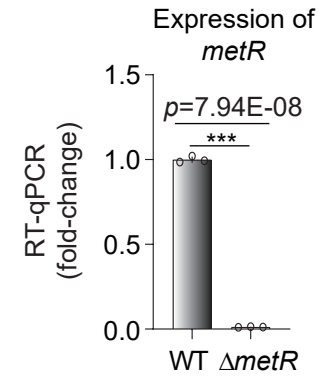

f

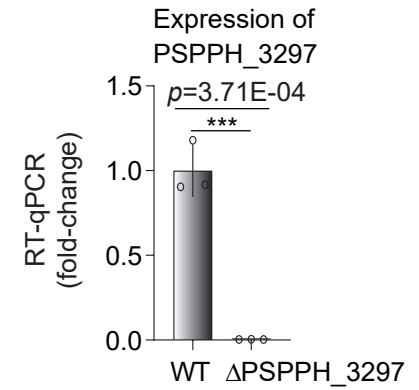

**Supplementary Figure 2. Validation of different modes of TF binding, related to Fig. 2.**

(a) The distribution of the number of TF binding modes different families. The TF family is color-coded. The prevalent dimeric types are classified as head-to-head, head-to-tail and tail-to-tail, most of them are the head-to-head palindromic binding preference.

(b) Validation of the putative binding of PcaQ in the promoter of the gene *pcaH* was verified using EMSA, and a fragment taken from the *gntR* promoter was used as the negative control.

(c) The deficient expression *pcaQ* in  $\Delta$ *pcaQ* was confirmed by RT-qPCR, compared with the wild-type strain (WT). *p* value is 1.120E-05.

(d) Validation of two putative binding sites of MetR by EMSA and a fragment taken from the *gntR* promoter was used as the negative control.

(e) The deficient expression *metR* in  $\Delta$ *metR* was confirmed by RT-qPCR, compared with the wild-type strain (WT). *p* value is 7.935E-08.

(f) The deficient expression PSPPH\_3297 in the PSPPH\_3297 mutant strain ( $\Delta$ PSPPH\_3297) was confirmed by RT-qPCR, compared with the wild-type strain (WT). *p* value is 3.710E-04.

Three independent biological replicates were performed. Statistic *p* values by two-tailed Student's t-test are shown; \*\*\* *p* < 0.001 (c-f). Error bars show standard deviations. Source data to this figure are provided in the Source Data file.

Supplementary Figure 3

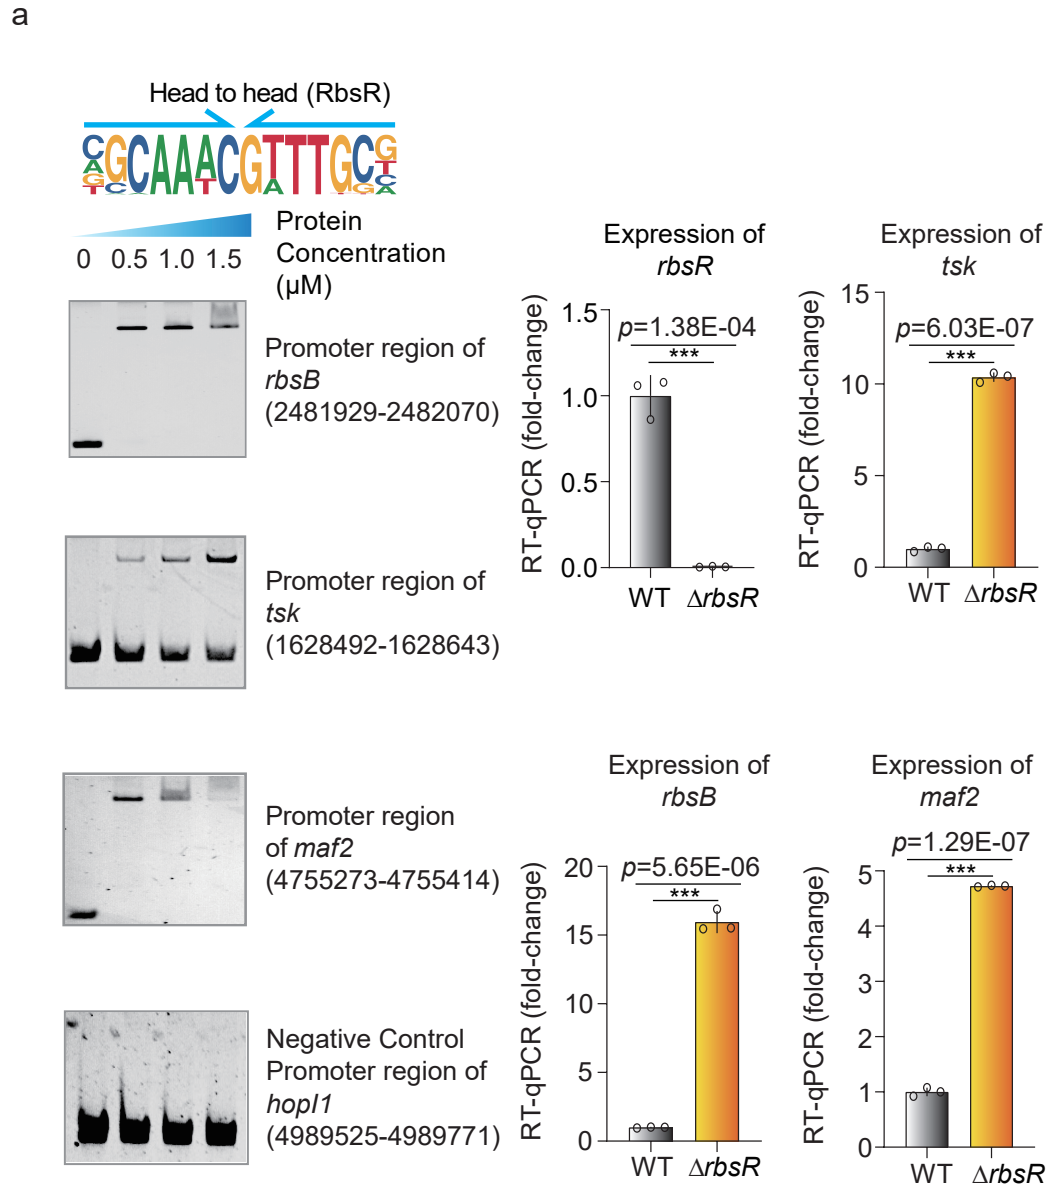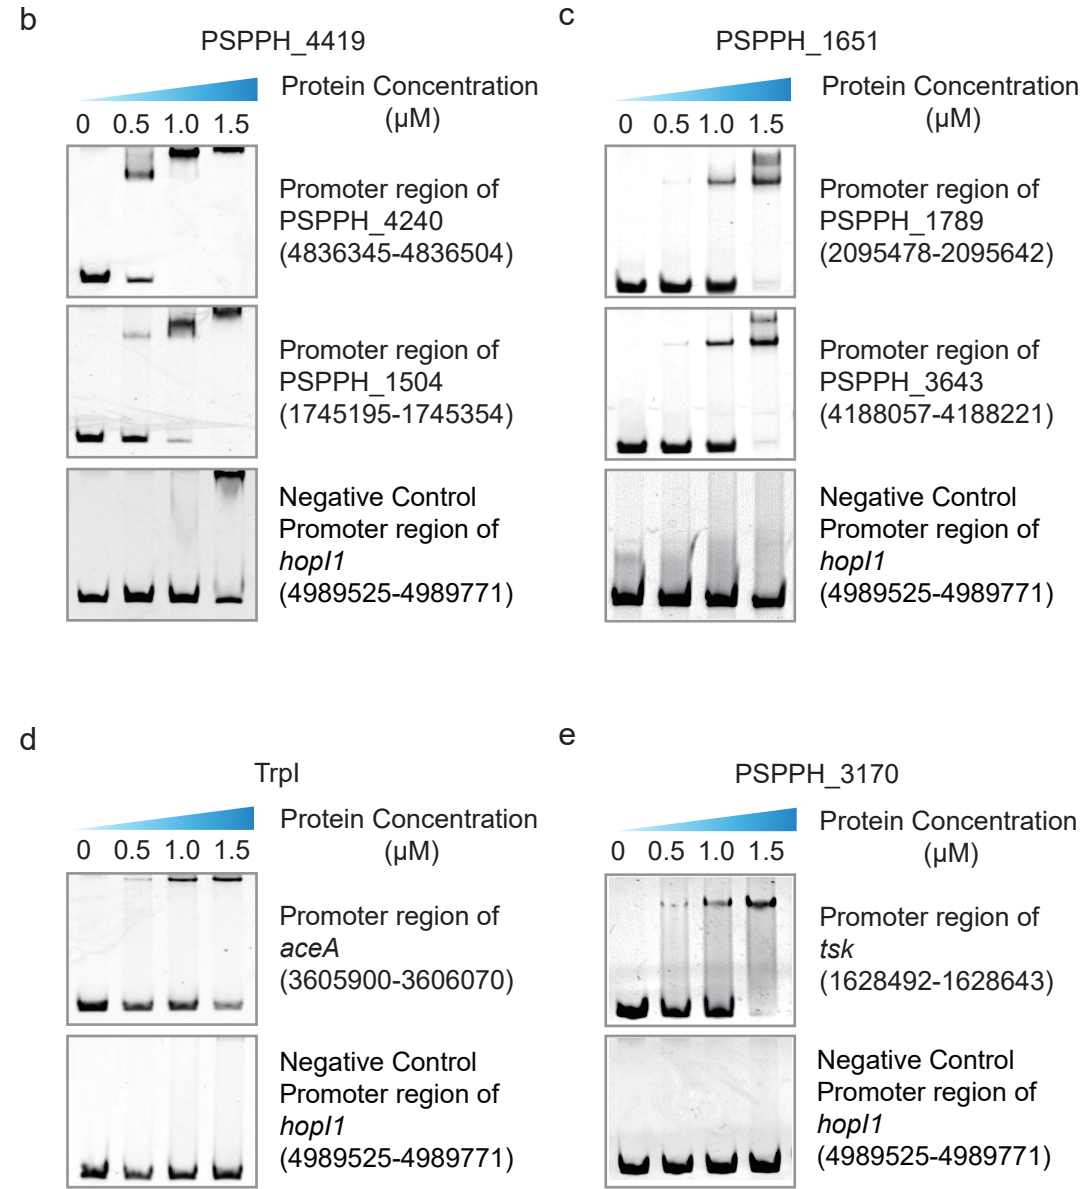

### Supplementary Figure 3. Validation of putative TF binding sites, related to Fig. 2.

(a) Validation of the binding of RbsR by EMSA and RT-qPCR. The putative binding sites from the promoters of the target genes *rbsB*, *tsk* and *maf2* were verified using EMSA, respectively, and a fragment taken from the *hopI1* promoter was used as the negative control. The expression of target gene *rbsR*, *tsk*, *rbsB* and *maf2* were measured in wild-type and *rbsR* mutant ( $\Delta rbsR$ ) by RT-qPCR, respectively. Logo shows binding site model of RbsR. *p* value is 5.651E-06 (*rbsB*), 6.033E-07 (*tsk*), and 1.290E-07 (*maf2*), respectively.

(b) Validation of two putative binding sites of PSPPH\_4419 by EMSA. The putative binding sites from the promoters of PSPPH\_4240 and PSPPH\_1504 were verified using EMSA, respectively.

(c) Validating the binding site of PSPPH\_1651 by EMSA. The putative binding sites from the promoter of target gene PSPPH\_1789 and PSPPH\_3643 were verified using EMSA, respectively.

(d) Validating the binding site of TrpI by EMSA. The putative binding sites from the promoter of target gene *aceA* was verified using EMSA.

(e) Validating the binding site of PSPPH\_3170 by EMSA. The putative binding sites from the promoter of target gene *tsk* was verified using EMSA.

Three independent biological replicates were performed. Statistic *p* values by two-tailed Student's t-test are shown; \*\*\* *p* < 0.001. Error bars show standard deviations. A fragment taken from the *hopI1* promoter was used as the negative control (B-E). Source data to this figure are provided in the Source Data file.



Supplementary Figure 4

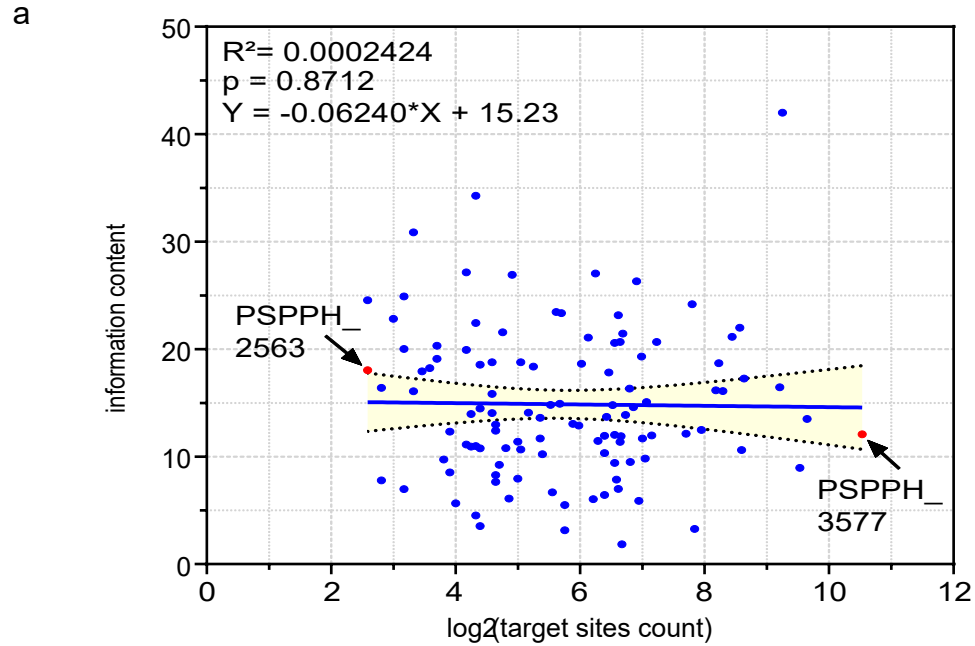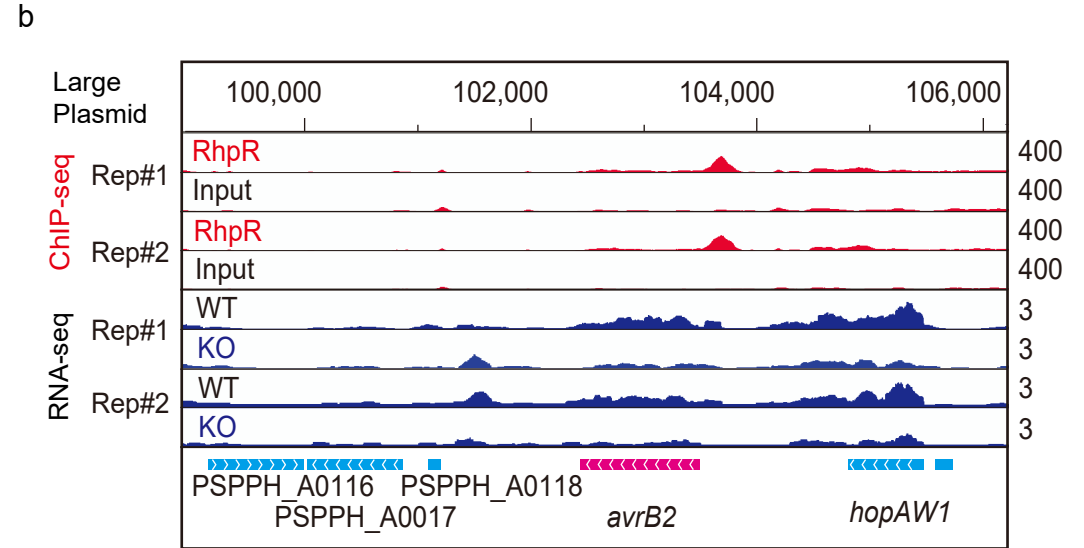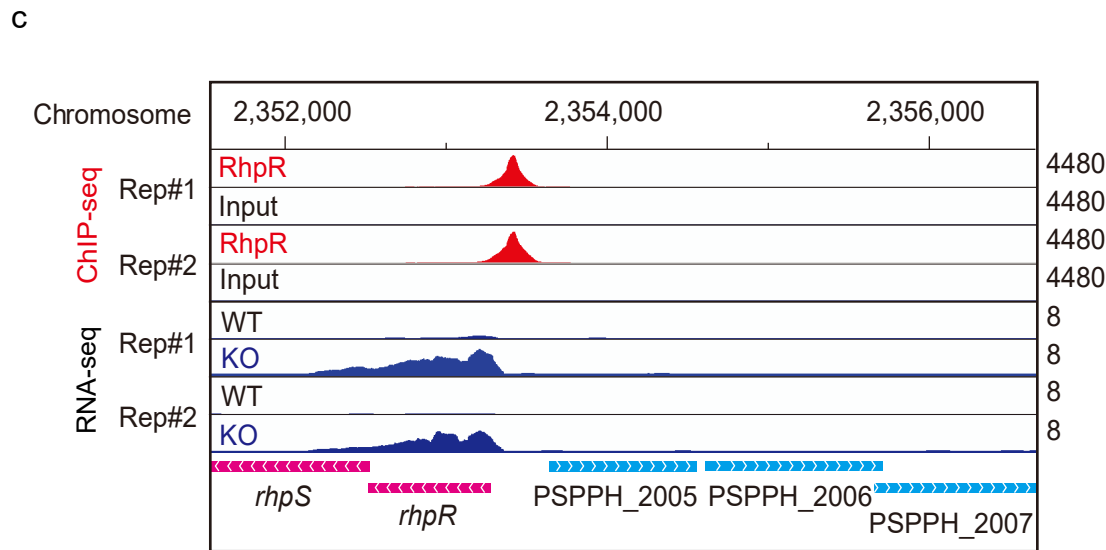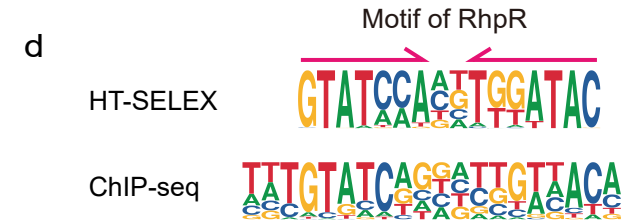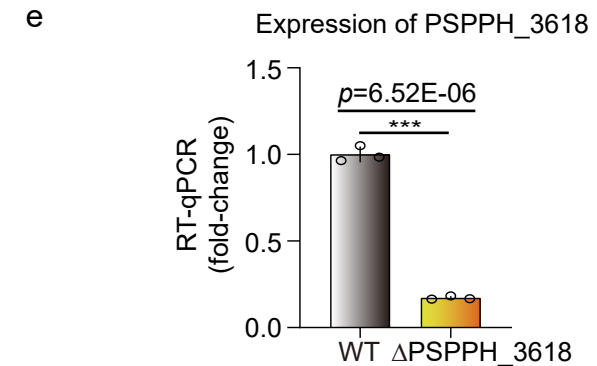

#### Supplementary Figure 4. Transcriptional regulation in T3SS pathway.

(a) Scatterplot shows the trend of the number of putative genomic sites of a TF by PWM model (x-axis) along the information content of the model (y-axis). Note that there's no significant correlation between the two variables ( $p=0.8712$ , two-sided), suggesting that the differential number of targets of different TFs may not result from the motif complexity or degeneracy but more likely depends on the genomic composition. Red dots highlight the two TFs with the most of least number of putative genomic sites shown in Fig. 3a.

(b) Binding of RhpR to a putative site in the promoter of the *avrB2* gene on the large plasmid is proven by ChIP-seq in the wild-type cells. The RNA-seq result shows that loss of *rhpS* leads to increased RhpR expression. The increased binding of RhpR caused reduced expression of *avrB*. Rep# indicates the independent biological replicate.

(c) Binding of RhpR to a putative site in its own promoter is proven by ChIP-seq in the wild-type cells. The RNA-seq result shows that loss of *rhpS* leads to increased RhpR expression in knockout cells (KO) compared to the wild-type cells (WT). Red peaks show RhpR validated binding sites in the promoter of *rhpR* gene, blue peaks show the RhpR expression. Rep# indicates the biological replicates.

(d) Comparison of the binding motif of RhpR obtained from HT-SELEX (upper) or ChIP-seq (lower). Arrows indicate half-sites in dimeric sites.

(e) The deficient expression of PSPPH\_3618 in  $\Delta$ PSPPH\_3618 was confirmed by RT-qPCR, compared with the wild-type strain (WT).  $p$  value is  $6.521E-06$ .

Three independent replicates were performed. Statistic  $p$  values by two-tailed Student's t-test are shown; \*\*\*  $p < 0.001$ . Error bars show standard deviations. Source data to this figure are provided in the Source Data file.

**Supplementary Table 1a: Family classification for TF based on DBD domain, related to Fig.1b, Fig.2, Supplementary Fig. 2 and 3.**

| DBD family categories for 301 TFs we used in the study |              |         |                   |
|--------------------------------------------------------|--------------|---------|-------------------|
| No.                                                    | TF Locus_tag | TF Name | DBD Family (Pfam) |
| 1                                                      | PSPPH_3155   |         | LysR family       |
| 2                                                      | PSPPH_2921   |         |                   |
| 3                                                      | PSPPH_3817   |         |                   |
| 4                                                      | PSPPH_2301   |         |                   |
| 5                                                      | PSPPH_3022   |         |                   |
| 6                                                      | PSPPH_4062   | IciA    |                   |
| 7                                                      | PSPPH_3079   |         |                   |
| 8                                                      | PSPPH_3464   |         |                   |
| 9                                                      | PSPPH_3911   | MetR    |                   |
| 10                                                     | PSPPH_0141   |         |                   |
| 11                                                     | PSPPH_3233   |         |                   |
| 12                                                     | PSPPH_3990   |         |                   |
| 13                                                     | PSPPH_3460   |         |                   |
| 14                                                     | PSPPH_1100   |         |                   |
| 15                                                     | PSPPH_2439   |         |                   |
| 16                                                     | PSPPH_2095   | PcaQ    |                   |
| 17                                                     | PSPPH_0037   | TrpI    |                   |
| 18                                                     | PSPPH_2555   |         |                   |
| 19                                                     | PSPPH_3611   |         |                   |
| 20                                                     | PSPPH_0711   |         |                   |
| 21                                                     | PSPPH_2309   | MexT    |                   |
| 22                                                     | PSPPH_2469   |         |                   |
| 23                                                     | PSPPH_4620   |         |                   |
| 24                                                     | PSPPH_2772   |         |                   |
| 25                                                     | PSPPH_2638   |         |                   |
| 26                                                     | PSPPH_2048   | CysB    |                   |
| 27                                                     | PSPPH_2693   |         |                   |
| 28                                                     | PSPPH_1493   |         |                   |
| 29                                                     | PSPPH_4998   |         |                   |
| 30                                                     | PSPPH_1259   |         |                   |
| 31                                                     | PSPPH_3798   |         |                   |
| 32                                                     | PSPPH_2444   |         |                   |
| 33                                                     | PSPPH_0190   | OxyR    |                   |
| 34                                                     | PSPPH_4638   |         |                   |
| 35                                                     | PSPPH_0700   |         |                   |
| 36                                                     | PSPPH_1435   |         |                   |
| 37                                                     | PSPPH_2193   |         |                   |
| 38                                                     | PSPPH_5144   |         |                   |
| 39                                                     | PSPPH_3411   |         |                   |
| 40                                                     | PSPPH_3278   |         |                   |
| 41                                                     | PSPPH_2688   |         |                   |
| 42                                                     | PSPPH_1737   |         |                   |
| 43                                                     | PSPPH_1951   |         |                   |
| 44                                                     | PSPPH_1758   |         |                   |
| 45                                                     | PSPPH_0442   |         |                   |
| 46                                                     | PSPPH_3014   |         |                   |
| 47                                                     | PSPPH_2580   |         |                   |
| 48                                                     | PSPPH_3618   |         |                   |
| 49                                                     | PSPPH_2631   |         |                   |
| 50                                                     | PSPPH_0077   |         |                   |
| 51                                                     | PSPPH_2476   |         |                   |
| 52                                                     | PSPPH_2236   |         |                   |
| 53                                                     | PSPPH_2967   |         |                   |
| 54                                                     | PSPPH_0589   |         |                   |
| 55                                                     | PSPPH_1579   |         |                   |
| 56                                                     | PSPPH_2454   |         |                   |

|     |            |             |
|-----|------------|-------------|
| 57  | PSPPH_2553 |             |
| 58  | PSPPH_3241 |             |
| 59  | PSPPH_5132 |             |
| 60  | PSPPH_2689 |             |
| 61  | PSPPH_0411 |             |
| 62  | PSPPH_2300 |             |
| 63  | PSPPH_3468 |             |
| 64  | PSPPH_2491 |             |
| 65  | PSPPH_3643 |             |
| 66  | PSPPH_0031 |             |
| 67  | PSPPH_2423 |             |
| 68  | PSPPH_2295 |             |
| 69  | PSPPH_2204 |             |
| 70  | PSPPH_0755 |             |
| 71  | PSPPH_1049 |             |
| 72  | PSPPH_2106 |             |
| 73  | PSPPH_4622 |             |
| 74  | PSPPH_2407 |             |
| 75  | PSPPH_1730 |             |
| 76  | PSPPH_1728 |             |
| 77  | PSPPH_3487 |             |
| 78  | PSPPH_3244 | AefR        |
| 79  | PSPPH_2448 |             |
| 80  | PSPPH_3066 |             |
| 81  | PSPPH_3654 |             |
| 82  | PSPPH_2305 |             |
| 83  | PSPPH_2214 | TetR family |
| 84  | PSPPH_4495 |             |
| 85  | PSPPH_3202 | PsrA        |
| 86  | PSPPH_2733 |             |
| 87  | PSPPH_3479 |             |
| 88  | PSPPH_4788 |             |
| 89  | PSPPH_0376 |             |
| 90  | PSPPH_0735 |             |
| 91  | PSPPH_3268 |             |
| 92  | PSPPH_4899 |             |
| 93  | PSPPH_1651 |             |
| 94  | PSPPH_3872 |             |
| 95  | PSPPH_3983 |             |
| 96  | PSPPH_4012 |             |
| 97  | PSPPH_4768 | BetI        |
| 98  | PSPPH_0218 |             |
| 99  | PSPPH_1969 |             |
| 100 | PSPPH_2983 |             |
| 101 | PSPPH_2315 |             |
| 102 | PSPPH_5138 |             |
| 103 | PSPPH_3936 |             |
| 104 | PSPPH_3577 |             |
| 105 | PSPPH_0349 | HutC        |
| 106 | PSPPH_0286 |             |
| 107 | PSPPH_3031 |             |
| 108 | PSPPH_1771 |             |
| 109 | PSPPH_3004 |             |
| 110 | PSPPH_0486 |             |
| 111 | PSPPH_2055 | GntR family |
| 112 | PSPPH_1776 |             |
| 113 | PSPPH_3005 |             |
| 114 | PSPPH_3471 |             |
| 115 | PSPPH_5087 |             |

|     |            |       |                  |
|-----|------------|-------|------------------|
| 116 | PSPPH_2937 | PhnF  |                  |
| 117 | PSPPH_2473 |       |                  |
| 118 | PSPPH_2720 |       |                  |
| 119 | PSPPH_1595 |       |                  |
| 120 | PSPPH_4253 |       |                  |
| 121 | PSPPH_1233 |       |                  |
| 122 | PSPPH_2563 |       |                  |
| 123 | PSPPH_3048 |       |                  |
| 124 | PSPPH_3285 |       |                  |
| 125 | PSPPH_2357 |       |                  |
| 126 | PSPPH_4744 |       |                  |
| 127 | PSPPH_4127 |       |                  |
| 128 | PSPPH_2421 |       |                  |
| 129 | PSPPH_4841 |       |                  |
| 130 | PSPPH_4692 |       |                  |
| 131 | PSPPH_2862 |       |                  |
| 132 | PSPPH_3431 | PobR  |                  |
| 133 | PSPPH_2893 |       |                  |
| 134 | PSPPH_1097 |       | AraC/XylS family |
| 135 | PSPPH_3122 |       |                  |
| 136 | PSPPH_3486 |       |                  |
| 137 | PSPPH_2597 |       |                  |
| 138 | PSPPH_1962 |       |                  |
| 139 | PSPPH_2994 |       |                  |
| 140 | PSPPH_1670 |       |                  |
| 141 | PSPPH_2984 |       |                  |
| 142 | PSPPH_3522 |       |                  |
| 143 | PSPPH_2774 |       |                  |
| 144 | PSPPH_1615 |       |                  |
| 145 | PSPPH_0082 |       |                  |
| 146 | PSPPH_2337 |       |                  |
| 147 | PSPPH_1169 |       |                  |
| 148 | PSPPH_1680 |       |                  |
| 149 | PSPPH_1270 | HrpR  |                  |
| 150 | PSPPH_2426 |       |                  |
| 151 | PSPPH_2229 |       |                  |
| 152 | PSPPH_1271 | HrpS  |                  |
| 153 | PSPPH_4853 | NtrC  |                  |
| 154 | PSPPH_0252 | AlgB  | Fis family       |
| 155 | PSPPH_0857 | TsiR  |                  |
| 156 | PSPPH_3385 | FleR  |                  |
| 157 | PSPPH_3907 |       |                  |
| 158 | PSPPH_4002 |       |                  |
| 159 | PSPPH_4255 |       |                  |
| 160 | PSPPH_0736 | PilR  |                  |
| 161 | PSPPH_3387 | FleQ  |                  |
| 162 | PSPPH_3168 |       |                  |
| 163 | PSPPH_4448 |       |                  |
| 164 | PSPPH_0146 |       |                  |
| 165 | PSPPH_1460 | CpxR  |                  |
| 166 | PSPPH_2004 | RhpR  |                  |
| 167 | PSPPH_2022 | KdpE  |                  |
| 168 | PSPPH_3127 |       |                  |
| 169 | PSPPH_2376 | BaeS1 |                  |
| 170 | PSPPH_3547 |       |                  |
| 171 | PSPPH_3040 |       |                  |
| 172 | PSPPH_1195 |       |                  |
| 173 | PSPPH_3453 |       |                  |
| 174 | PSPPH_4828 |       | OmpR family      |

|     |            |      |             |
|-----|------------|------|-------------|
| 175 | PSPPH_0246 | OmpR | OmpR family |
| 176 | PSPPH_3962 | TctD |             |
| 177 | PSPPH_3294 |      |             |
| 178 | PSPPH_2995 |      |             |
| 179 | PSPPH_1179 | GltR |             |
| 180 | PSPPH_5114 | PhoB |             |
| 181 | PSPPH_3730 | PhoP |             |
| 182 | PSPPH_4075 | ColR |             |
| 183 | PSPPH_3737 | RstA |             |
| 184 | PSPPH_2539 |      |             |
| 185 | PSPPH_2917 |      |             |
| 186 | PSPPH_3170 |      |             |
| 187 | PSPPH_1393 |      |             |
| 188 | PSPPH_0653 |      |             |
| 189 | PSPPH_2151 |      |             |
| 190 | PSPPH_2478 |      |             |
| 191 | PSPPH_0226 |      |             |
| 192 | PSPPH_5057 |      |             |
| 193 | PSPPH_4324 |      |             |
| 194 | PSPPH_1584 |      |             |
| 195 | PSPPH_2792 |      |             |
| 196 | PSPPH_4694 |      |             |
| 197 | PSPPH_4674 |      |             |
| 198 | PSPPH_4673 |      |             |
| 199 | PSPPH_2194 |      |             |
| 200 | PSPPH_2327 |      |             |
| 201 | PSPPH_2800 |      |             |
| 202 | PSPPH_4238 |      |             |
| 203 | PSPPH_1818 |      |             |
| 204 | PSPPH_5171 |      |             |
| 205 | PSPPH_3800 |      |             |
| 206 | PSPPH_4241 |      |             |
| 207 | PSPPH_0642 |      |             |
| 208 | PSPPH_3220 |      |             |
| 209 | PSPPH_1364 |      |             |
| 210 | PSPPH_1374 |      |             |
| 211 | PSPPH_2328 | GacA |             |
| 212 | PSPPH_0778 |      |             |
| 213 | PSPPH_1906 |      |             |
| 214 | PSPPH_2015 |      |             |
| 215 | PSPPH_2149 |      |             |
| 216 | PSPPH_4419 |      |             |
| 217 | PSPPH_4336 |      |             |
| 218 | PSPPH_1762 |      |             |
| 219 | PSPPH_0239 |      |             |
| 220 | PSPPH_5042 |      |             |
| 221 | PSPPH_4377 |      |             |
| 222 | PSPPH_1244 |      |             |
| 223 | PSPPH_4356 |      |             |
| 224 | PSPPH_4700 |      |             |
| 225 | PSPPH_5054 |      |             |
| 226 | PSPPH_0222 | Irp  |             |
| 227 | PSPPH_2338 |      |             |
| 228 | PSPPH_3257 | GntR |             |
| 229 | PSPPH_2128 | RbsR |             |
| 230 | PSPPH_0846 | FruR |             |
| 231 | PSPPH_5193 |      |             |
| 232 | PSPPH_4730 |      |             |
| 233 | PSPPH_2905 |      |             |
| 234 | PSPPH_4858 |      |             |

|     |            |       |                          |
|-----|------------|-------|--------------------------|
| 235 | PSPPH_1617 |       | MarR family              |
| 236 | PSPPH_1519 |       |                          |
| 237 | PSPPH_2432 |       |                          |
| 238 | PSPPH_1800 |       |                          |
| 239 | PSPPH_3555 | MarR  |                          |
| 240 | PSPPH_3297 |       |                          |
| 241 | PSPPH_3645 | MgrA  | Cold Shock Domain family |
| 242 | PSPPH_1160 |       |                          |
| 243 | PSPPH_3099 | CspD  |                          |
| 244 | PSPPH_1380 | CapB  |                          |
| 245 | PSPPH_2133 | CapA  |                          |
| 246 | PSPPH_3779 |       |                          |
| 247 | PSPPH_4644 |       | MerR family              |
| 248 | PSPPH_2142 |       |                          |
| 249 | PSPPH_1011 |       |                          |
| 250 | PSPPH_2630 |       |                          |
| 251 | PSPPH_4870 | CadR  |                          |
| 252 | PSPPH_3247 | IclR  |                          |
| 253 | PSPPH_4020 | PcaR  | IclR family              |
| 254 | PSPPH_1960 |       |                          |
| 255 | PSPPH_2665 |       |                          |
| 256 | PSPPH_2832 |       |                          |
| 257 | PSPPH_3900 | GlpR  |                          |
| 258 | PSPPH_5204 |       |                          |
| 259 | PSPPH_4844 |       | DeoR family              |
| 260 | PSPPH_2188 |       |                          |
| 261 | PSPPH_3439 | Srl   |                          |
| 262 | PSPPH_1734 |       |                          |
| 263 | PSPPH_1222 |       |                          |
| 264 | PSPPH_4056 |       |                          |
| 265 | PSPPH_4637 |       | ArsR family              |
| 266 | PSPPH_4822 |       |                          |
| 267 | PSPPH_0406 |       |                          |
| 268 | PSPPH_5145 |       |                          |
| 269 | PSPPH_1187 | HexR  |                          |
| 270 | PSPPH_3195 |       |                          |
| 271 | PSPPH_4612 |       | RpiR family              |
| 272 | PSPPH_2219 |       |                          |
| 273 | PSPPH_1456 |       |                          |
| 274 | PSPPH_1136 |       |                          |
| 275 | PSPPH_2859 |       |                          |
| 276 | PSPPH_5194 |       |                          |
| 277 | PSPPH_2872 |       | BirA family              |
| 278 | PSPPH_3530 |       |                          |
| 279 | PSPPH_3182 | DksA  |                          |
| 280 | PSPPH_0861 | DksA2 |                          |
| 281 | PSPPH_0263 |       |                          |
| 282 | PSPPH_4209 | Fur   |                          |
| 283 | PSPPH_0101 |       | Fur family               |
| 284 | PSPPH_0102 |       |                          |
| 285 | PSPPH_3203 | LexA2 |                          |
| 286 | PSPPH_2677 | LexA1 |                          |
| 287 | PSPPH_3351 | Anr   |                          |
| 288 | PSPPH_0676 | Vfr   |                          |
| 289 | PSPPH_3923 |       | CRP family               |
| 290 | PSPPH_3027 |       |                          |
| 291 | PSPPH_3504 |       |                          |
| 292 | PSPPH_1308 | IscR  |                          |
| 293 | PSPPH_1580 |       |                          |
| 294 | PSPPH_4920 |       |                          |
|     |            |       | PadR-like family         |
|     |            |       | PucR C-terminal          |
|     |            |       | Arc-like family          |
|     |            |       | Rrf2 family              |
|     |            |       | RmlC family              |
|     |            |       | Not annotated            |

|     |            |      |                            |
|-----|------------|------|----------------------------|
| 295 | PSPPH_5139 |      | PAI 2-type                 |
| 296 | PSPPH_4320 |      | Ribonuclease H-like family |
| 297 | PSPPH_1700 | Lon  | Lon family                 |
| 298 | PSPPH_0863 | SfsA | SfsA family                |
| 299 | PSPPH_0061 | AlgQ | Rsd/AlgQ family            |
| 300 | PSPPH_0069 | AlgR | LytTr family               |
| 301 | PSPPH_4646 |      | AraC family                |

| <b>The successful fractions of 301 TFs for HT-SELEX</b> |                      |                                 |                            |
|---------------------------------------------------------|----------------------|---------------------------------|----------------------------|
| <b>Family Name</b>                                      | <b>Number of TFs</b> | <b>Number of successful TFs</b> | <b>Successful Fraction</b> |
| LysR family                                             | 68                   | 25                              | 0.367647059                |
| TetR family                                             | 29                   | 7                               | 0.24137931                 |
| GntR family                                             | 26                   | 13                              | 0.5                        |
| AraC/XylS family                                        | 21                   | 1                               | 0.047619048                |
| Fis family                                              | 20                   | 7                               | 0.35                       |
| OmpR family                                             | 20                   | 10                              | 0.5                        |
| Cro/CI family                                           | 17                   | 3                               | 0.176470588                |
| LuxR family                                             | 16                   | 7                               | 0.4375                     |
| AsnC family                                             | 9                    | 1                               | 0.111111111                |
| LacI family                                             | 8                    | 6                               | 0.75                       |
| MarR family                                             | 7                    | 4                               | 0.571428571                |
| Cold Shock Domain family                                | 5                    | 2                               | 0.4                        |
| MerR family                                             | 5                    | 2                               | 0.4                        |
| IclR family                                             | 5                    | 2                               | 0.4                        |
| DeoR family                                             | 5                    | 1                               | 0.2                        |
| ArsR family                                             | 5                    | 0                               | 0                          |
| RpiR family                                             | 4                    | 2                               | 0.5                        |
| BirA family                                             | 3                    | 1                               | 0.333333333                |
| HxlR family                                             | 3                    | 0                               | 0                          |
| Sigma factor 54                                         | 2                    | 0                               | 0                          |
| Zinc finger family                                      | 2                    | 0                               | 0                          |
| Fur family                                              | 2                    | 2                               | 1                          |
| ParB family                                             | 2                    | 0                               | 0                          |
| LexA repressor                                          | 2                    | 1                               | 0.5                        |
| CRP family                                              | 2                    | 1                               | 0.5                        |
| PadR-like family                                        | 1                    | 0                               | 0                          |
| PucR C-terminal                                         | 1                    | 0                               | 0                          |
| Arc-like family                                         | 1                    | 0                               | 0                          |
| Rrf2 family                                             | 1                    | 1                               | 1                          |
| RmlC family                                             | 1                    | 1                               | 1                          |
| Not annotated                                           | 1                    | 0                               | 0                          |
| PAI 2-type                                              | 1                    | 0                               | 0                          |
| Ribonuclease H-like family                              | 1                    | 0                               | 0                          |
| Lon family                                              | 1                    | 0                               | 0                          |
| SfsA family                                             | 1                    | 0                               | 0                          |
| Rsd/AlgQ family                                         | 1                    | 0                               | 0                          |
| LytTr family                                            | 1                    | 0                               | 0                          |
| AraC family                                             | 1                    | 0                               | 0                          |



| <b>Primers</b>                            | <b>Sequences</b>         |
|-------------------------------------------|--------------------------|
| <b>EMSA</b>                               |                          |
| EMSA-PSPPH_2621-F                         | TACTTTAAAGAACGGGATGAT    |
| EMSA-PSPPH_2621-R                         | GGTGCGGCATATCCCGT        |
| EMSA-PSPPH_3297-F                         | CTGAGTCGTGAACAAT         |
| EMSA-PSPPH_3297-R                         | TCTACGCCCCCTCAA          |
| EMSA-PSPPH_0985-F                         | CTTTTAGGCCTTTGTTAGCT     |
| EMSA-PSPPH_0985-R                         | GTACCTGCCAGAATGTTGA      |
| EMSA- <i>katB</i> -F                      | ACAATTAGTTGAATAATTTTCCTT |
| EMSA- <i>katB</i> -R                      | TAGACGGCGTGATTAAACG      |
| EMSA- <i>rhsB</i> -F                      | AACAGATTTTCATTTTCGACGG   |
| EMSA- <i>rhsB</i> -R                      | ATGAGTTCATCTCCGATCTT     |
| EMSA- <i>tsk</i> -F                       | GGGCGTTGCGGATCGAG        |
| EMSA- <i>tsk</i> -R                       | CCCGATCGGTCATCTTCT       |
| EMSA- <i>maf2</i> -F                      | AAGCGAGGGCATAAGGACA      |
| EMSA- <i>maf2</i> -R                      | CTGTTGTGGCCCTGGATC       |
| EMSA- <i>nuoA</i> -F                      | CTGACGCCCGGCTG           |
| EMSA- <i>nuoA</i> -R                      | GTGCTTGATAAAGAGTC        |
| EMSA- <i>sdhC</i> -F                      | CACCACCCAGGAAGT          |
| EMSA- <i>sdhC</i> -R                      | TTTGTCCCGGCAACG          |
| EMSA-PSPPH_4240-F                         | GGCCGCTACCGTGTCAG        |
| EMSA-PSPPH_4240-R                         | TTCTGTTAAGCATCAGGCG      |
| EMSA-PSPPH_1504-F                         | CTGCTCGGGCCGCGC          |
| EMSA-PSPPH_1504-R                         | TCGCGAAACCGAGCGCT        |
| EMSA-PSPPH_1024-F                         | TCAAGAATTACAGTTGTGCC     |
| EMSA-PSPPH_1024-R                         | TTCACAGAAATCCCCTGAAA     |
| EMSA-PSPPH_4247-F                         | TGCATACAAATGAGCAGGC      |
| EMSA-PSPPH_4247-R                         | GATGGGTGTTTCGGTGATG      |
| EMSA-PSPPH_1789-F                         | AGGTTCTGTCAGCCG          |
| EMSA-PSPPH_1789-R                         | CGCATGACGCGCTGT          |
| EMSA-PSPPH_3643-F                         | AAAGCGTTTTTCAGC          |
| EMSA-PSPPH_3643-R                         | CATCAATCTCCAGATG         |
| EMSA- <i>aceA</i> -F                      | GGAGCGAGGCAATCATGC       |
| EMSA- <i>aceA</i> -R                      | TTTTGCGCGTAAAGGTCTG      |
| EMSA-NC(3776311-3776381)- <i>gntR</i> -F  | CATAGGGGTTGCCAAATGT      |
| EMSA-NC(3776311-3776381)- <i>gntR</i> -R  | ATAAAGCATTGTCACCTTCC     |
| EMSA-NC(4989525-4989771)- <i>hopI1</i> -F | CTGCTCCAGCAATGAGC        |
| EMSA-NC(4989525-4989771)- <i>hopI1</i> -R | ATGCTCGCGTCAGTGTTT       |
| <b>RT-qPCR</b>                            |                          |
| RT-PSPPH_2621-F                           | CAGACCATTACCCCGAGTGT     |
| RT-PSPPH_2621-R                           | GCCAGAAACAGGTGCTCAA      |
| RT-PSPPH_0985-F                           | GGGTGGAATCTTCTGGTGGA     |
| RT-PSPPH_0985-R                           | CGTCTGTTTCTCTTTGCGCT     |

|                                   |                                               |
|-----------------------------------|-----------------------------------------------|
| RT- <i>katB</i> -F                | ACCAAGTTCTACACGGCAGA                          |
| RT- <i>katB</i> -R                | ACCATGTCCGGAACTTGAT                           |
| RT- <i>maf2</i> -F                | CTTGATGGGCGCATTCTTGG                          |
| RT- <i>maf2</i> -R                | ACAATACGGGTTTCACTGCG                          |
| RT- <i>tsk</i> -F                 | CCAAGCCCAACGATGACATT                          |
| RT- <i>tsk</i> -R                 | CATGATCCCAGACGCCTTTG                          |
| RT- <i>rbsB</i> -F                | GAAGTCGCTCGCCAATGAAT                          |
| RT- <i>rbsB</i> -R                | AGGTGTCTGACTCGTCCTTG                          |
| RT- <i>nuoA</i> -F                | CGCAGCAAGAACGAACCTTT                          |
| RT- <i>nuoA</i> -R                | AGCATCGCGACCAGATAGAA                          |
| RT- <i>sdhC</i> -F                | GTGAAGTCAAGGCGTGTCTG                          |
| RT- <i>sdhC</i> -R                | CGGAGTCCATGATGAGGTGA                          |
| <b>Lux reporter</b>               |                                               |
| pMS402-PSPPH_2621-F               | TCGTCTTCACCTCGAGGGGATCCTGTTTCAGAGCAGTGAGAAA   |
| pMS402-PSPPH_2621-R               | GCGGCCGCAACTAGAGGATCCGCACAGCAGATAAAAAGCAA     |
| pMS402-PSPPH_3297-F               | TCGTCTTCACCTCGAGGGGATCCGGAGTAGCTCGCAAGGTA     |
| pMS402-PSPPH_3297-R               | GCGGCCGCAACTAGAGGATCCGAATCACCGGGGGCTGA        |
| <b>Mutant validation</b>          |                                               |
| PSPPH_3297-verify-PCR-F           | GTAGCAATTATTTTTGAAACAAT                       |
| PSPPH_3297-verify-PCR-R           | AGGGTGCCGGCGGCC                               |
| PSPPH_3297-qPCR-F                 | CATCAGGTAAAAGTCGCGCA                          |
| PSPPH_3297-qPCR-R                 | GATCATTGGGGTCTTCGCTG                          |
| <i>metR</i> -verify-PCR-F         | CACCCTGATCCTGTTTCCA                           |
| <i>metR</i> -verify-PCR-R         | TCCGCTGACACGCGACC                             |
| <i>metR</i> -qPCR-F               | CATTGTTCCGGAAGACCTGC                          |
| <i>metR</i> -qPCR-R               | CATCACCGTCAATTCCGAGG                          |
| <i>rbsR</i> -verify-PCR-F         | TCGGTGGCACCAGCCTG                             |
| <i>rbsR</i> -verify-PCR-R         | CCACACTGCCACCCAGG                             |
| <i>rbsR</i> -qPCR-F               | ATCGAGGACTACTGTGAGCG                          |
| <i>rbsR</i> -qPCR-R               | AGCAAAACACGCACGTAACT                          |
| <i>pcaQ</i> -varify-PCR-F         | GTTGCCGAAGCGGTTTTAC                           |
| <i>pcaQ</i> -varify-PCR-R         | GGAAATGGATTGCGGGATA                           |
| <i>pcaQ</i> -qPCR-F               | CCATCTGGTGTGCTTTCTCG                          |
| <i>pcaQ</i> -qPCR-R               | GCAGTGTTCCAGCTCCTTG                           |
| <b>Mutant construction</b>        |                                               |
| pK18-PSPPH_3297-up-F              | AAACAGCTATGACATGATTACGAATTCGCACGCCCTGCGCAATG  |
| pK18-PSPPH_3297-up-R<br>(BamHI)   | TTGGATCCGAATCACCGGGGGCTGAG                    |
| pK18-PSPPH_3297-down-F<br>(BamHI) | TTGGATCCTATTTCAAGCCTTCGCCGA                   |
| pK18-PSPPH_3297-down-R            | AACGACGGCCAGTGCCAAGCTTTTCATGAAGTCCGCGTCGT     |
| pK18- <i>metR</i> -up-F           | AAACAGCTATGACATGATTACGAATTCGCCACACTTGCCTGACAG |
| pK18- <i>metR</i> -up-R (BamHI)   | TTGGATCCACAGCGCCGACTGCGTC                     |
| pK18- <i>metR</i> -down-F(BamHI)  | TTGGATCCTCGCGCCGACATGCTCG                     |
| pK18- <i>metR</i> -down-R         | AACGACGGCCAGTGCCAAGCTTCCGCTGGTTGCGCTTCG       |

|                                  |                                                  |
|----------------------------------|--------------------------------------------------|
| pK18- <i>pcaQ</i> -up-F          | AAACAGCTATGACATGATTACGAATTCTTCTACGTCGTGTACTION   |
| pK18- <i>pcaQ</i> -up-R (BamHI)  | TTGGATCCATGCGCGTCGGGTCCG                         |
| pK18- <i>pcaQ</i> -down-F(BamHI) | TTGGATCCCCATTTGGTTATGGATAACC                     |
| pK18- <i>pcaQ</i> -down-R        | AACGACGGCCAGTGCCAAGCTTGCCGGGAACGCACGCA           |
| pK18- <i>rhsR</i> -up-F          | AAACAGCTATGACATGATTACGAATTCACGACTCATGAAAAATACTCC |
| pK18- <i>rhsR</i> -up-R (BamHI)  | TTGGATCCATCAGCCCTGGCGCCGT                        |
| pK18- <i>rhsR</i> -down-F(BamHI) | TTGGATCCTCGCCGCACCGCATAACA                       |
| pK18- <i>rhsR</i> -down-R        | AACGACGGCCAGTGCCAAGCTTTGTCTGGAAAACACTGCATCAA     |
| <b>TF cloning</b>                |                                                  |
| pET28a-PSPPH_4238-F              | AGCAAATGGGTTCGCGGATCCATGCATATCAGGTTGTCTG         |
| pET28a-PSPPH_4238-R              | CGGAGCTCGAATTCGGATCCTTATTGGTTCGAGTAAACGG         |
| pET28a-PSPPH_1818-F              | AGCAAATGGGTTCGCGGATCCATGTGCAGTGCCATTAAAG         |
| pET28a-PSPPH_1818-R              | CGGAGCTCGAATTCGGATCCTTACCTGATCAAACCCCG           |
| pET28a-PSPPH_1615-F              | AGCAAATGGGTTCGCGGATCCATGAAGATAAACGGGGCC          |
| pET28a-PSPPH_1615-R              | CGGAGCTCGAATTCGGATCCTTAGACCATGCCAATGTTG          |
| pET28a-PSPPH_3285-F              | AGCAAATGGGTTCGCGGATCCATGGAAAACATGAAAGGCAC        |
| pET28a-PSPPH_3285-R              | CGGAGCTCGAATTCGGATCCTTAAAGCCCTGAAAAAAGCCCTG      |
| pET28a-PSPPH_3530-F              | AGCAAATGGGTTCGCGGATCCATGCGCATCAAGGTGCA           |
| pET28a-PSPPH_3530-R              | CGGAGCTCGAATTCGGATCCTTAATCAGCGGATTGTTGA          |
| pET28a-PSPPH_0082-F              | AGCAAATGGGTTCGCGGATCCATGACCCTCATCGCCACT          |
| pET28a-PSPPH_0082-R              | CGGAGCTCGAATTCGGATCCTTAGCGCGGAATGC               |
| pET28a-PSPPH_2337-F              | AGCAAATGGGTTCGCGGATCCATGGCACTCAACAGCG            |
| pET28a-PSPPH_2337-R              | CGGAGCTCGAATTCGGATCCTTAGAGCCCTCGAAAATC           |
| pET28a-PSPPH_1169-F              | AGCAAATGGGTTCGCGGATCCATGCGCATCCATGTCAG           |
| pET28a-PSPPH_1169-R              | CGGAGCTCGAATTCGGATCCTTAGCGCTTGCCCGG              |
| pET28a-PSPPH_2872-F              | AGCAAATGGGTTCGCGGATCCATGACCCACCCCTGT             |
| pET28a-PSPPH_2872-R              | CGGAGCTCGAATTCGGATCCTTAGCGAATAACCCAGGC           |
| pET28a-PSPPH_2357-F              | AGCAAATGGGTTCGCGGATCCATGTCTGGGATCTGTTTC          |
| pET28a-PSPPH_2357-R              | CGGAGCTCGAATTCGGATCCTTAGGCACCTGGACATT            |
| pET28a-PSPPH_0406-F              | AGCAAATGGGTTCGCGGATCCATGGACATTCTGTACCAGAT        |
| pET28a-PSPPH_0406-R              | CGGAGCTCGAATTCGGATCCTTAGTCTCCCAACGGC             |
| pET28a-PSPPH_5145-F              | AGCAAATGGGTTCGCGGATCCATGAATCTGCTGCAACAC          |
| pET28a-PSPPH_5145-R              | CGGAGCTCGAATTCGGATCCTTAGTCTTCGTGAGTCTTTA         |
| pET28a- <i>hexR</i> -F           | AGCAAATGGGTTCGCGGATCCATGGACCGCGTAAGAAAC          |
| pET28a- <i>hexR</i> -R           | CGGAGCTCGAATTCGGATCCTTAGCCTTGATCCTCGATC          |
| pET28a-PSPPH_3195-F              | AGCAAATGGGTTCGCGGATCCATGACCCGCGCCGAT             |
| pET28a-PSPPH_3195-R              | CGGAGCTCGAATTCGGATCCTTAATCATCAAACCCGACCT         |
| pET28a-PSPPH_1680-F              | AGCAAATGGGTTCGCGGATCCATGTCTCAATCCAGCGC           |
| pET28a-PSPPH_1680-R              | CGGAGCTCGAATTCGGATCCTTAAACGATCCGCTGTTTC          |
| pET28a-PSPPH_2426-F              | AGCAAATGGGTTCGCGGATCCATGCCGGGCCGAGGT             |
| pET28a-PSPPH_2426-R              | CGGAGCTCGAATTCGGATCCTTAGGCGCCCCCTGG              |
| pET28a-PSPPH_3168-F              | AGCAAATGGGTTCGCGGATCCATGTCAGGGCAACTGCT           |
| pET28a-PSPPH_3168-R              | CGGAGCTCGAATTCGGATCCTTACACCGACAAATGCA            |
| pET28a-PSPPH_2229-F              | AGCAAATGGGTTCGCGGATCCATGCATGGATCGGCC             |
| pET28a-PSPPH_2229-R              | CGGAGCTCGAATTCGGATCCTTAGCGAATCTGATGCTTG          |

|                        |                                            |
|------------------------|--------------------------------------------|
| pET28a-PSPPH_3522-F    | AGCAAATGGGTGCGGGATCCATGTTCCAGATCGAGCCAT    |
| pET28a-PSPPH_3522-R    | CGGAGCTCGAATTCGGATCCTTAACCGCGTTCGGC        |
| pET28a-PSPPH_4744-F    | AGCAAATGGGTGCGGGATCCATGACATCGTTCAATCAAGGG  |
| pET28a-PSPPH_4744-R    | CGGAGCTCGAATTCGGATCCTTAAAGCCTCACACTCGC     |
| pET28a-PSPPH_4127-F    | AGCAAATGGGTGCGGGATCCATGCCGATCCAACACG       |
| pET28a-PSPPH_4127-R    | CGGAGCTCGAATTCGGATCCTTACAGCTTTTCCTTCTGG    |
| pET28a- <i>ptrA</i> -F | AGCAAATGGGTGCGGGATCCATGAAAAATCATCTCGTTGTGC |
| pET28a- <i>ptrA</i> -R | CGGAGCTCGAATTCGGATCCTTACGCCCGGGCAA         |
| pET28a- <i>ntrC</i> -F | AGCAAATGGGTGCGGGATCCATGAGCCGTAGTGAAACTG    |
| pET28a- <i>ntrC</i> -R | CGGAGCTCGAATTCGGATCCTTAGCCCTCATCAGCCTC     |
| pET28a- <i>fleQ</i> -F | AGCAAATGGGTGCGGGATCCATGTGGCGTGAAATCAAG     |
| pET28a- <i>fleQ</i> -R | CGGAGCTCGAATTCGGATCCTCAATCATCTGCCTGTTTTCAT |
| pET28a- <i>algB</i> -F | AGCAAATGGGTGCGGGATCCATGGAAGCAGCCACTGAG     |
| pET28a- <i>algB</i> -R | CGGAGCTCGAATTCGGATCCTTACAGTTGTACTGTTTACG   |
| pET28a-PSPPH_0146-F    | AGCAAATGGGTGCGGGATCCATGAGTTCCGGACACAGC     |
| pET28a-PSPPH_0146-R    | CGGAGCTCGAATTCGGATCCTTAATCGTTGTCATCGGA     |
| pET28a- <i>fleR</i> -F | AGCAAATGGGTGCGGGATCCATGTGCATCAACGTGCTG     |
| pET28a- <i>fleR</i> -R | CGGAGCTCGAATTCGGATCCTTAGGTAGCGAACAGATAG    |
| pET28a-PSPPH_3907-F    | AGCAAATGGGTGCGGGATCCATGAGCATCAACAGCGAC     |
| pET28a-PSPPH_3907-R    | CGGAGCTCGAATTCGGATCCTTAAAGCCCGTATTTCTTGA   |
| pET28a-PSPPH_4002-F    | AGCAAATGGGTGCGGGATCCATGAACGCGGTCATCGT      |
| pET28a-PSPPH_4002-R    | CGGAGCTCGAATTCGGATCCTTAGCTCAGGAACATTTCCCG  |
| pET28a-PSPPH_5171-F    | AGCAAATGGGTGCGGGATCCATGAACACAGCCGCCA       |
| pET28a-PSPPH_5171-R    | CGGAGCTCGAATTCGGATCCTTAACGGAGTTCTTTGAGC    |
| pET28a-PSPPH_3800-F    | AGCAAATGGGTGCGGGATCCATGACCTACGACATCCTG     |
| pET28a-PSPPH_3800-R    | CGGAGCTCGAATTCGGATCCTTAACTGGACGAGATGGA     |
| pET28a-PSPPH_4241-F    | AGCAAATGGGTGCGGGATCCATGCCGTGCAGAATCATTG    |
| pET28a-PSPPH_4241-R    | CGGAGCTCGAATTCGGATCCTCAGTGCTGTTTGCCTGGC    |
| pET28a-PSPPH_0642-F    | AGCAAATGGGTGCGGGATCCATGATTCGTGTTTGGTA      |
| pET28a-PSPPH_0642-R    | CGGAGCTCGAATTCGGATCCTCAGAGCAGTTTGTGCTC     |
| pET28a-PSPPH_3220-F    | AGCAAATGGGTGCGGGATCCATGACCTGCAATCTGTTA     |
| pET28a-PSPPH_3220-R    | CGGAGCTCGAATTCGGATCCTCAATCGTCCAGACTGAT     |
| pET28a-PSPPH_1364-F    | AGCAAATGGGTGCGGGATCCATGCGCGTCATCGTGGCT     |
| pET28a-PSPPH_1364-R    | CGGAGCTCGAATTCGGATCCTCAGGACATGCCGCTTTC     |
| pET28a-PSPPH_1374-F    | AGCAAATGGGTGCGGGATCCATGAATAAAGTGCTGATC     |
| pET28a-PSPPH_1374-R    | CGGAGCTCGAATTCGGATCCTCAGACCAGCCCGTTACG     |
| pET28a- <i>gacA</i> -F | AGCAAATGGGTGCGGGATCCATGATTAAGGTGCTAGTT     |
| pET28a- <i>gacA</i> -R | CGGAGCTCGAATTCGGATCCTCAGGCGCTGGCATCAAC     |
| pET28a- <i>cpxR</i> -F | AGCAAATGGGTGCGGGATCCATGACTTCCGTATTGCTTG    |
| pET28a- <i>cpxR</i> -R | CGGAGCTCGAATTCGGATCCTCATGGCGTAATCAACAG     |
| pET28a-PSPPH_0778-F    | AGCAAATGGGTGCGGGATCCATGCAGCTCAGAATCATC     |
| pET28a-PSPPH_0778-R    | CGGAGCTCGAATTCGGATCCTACGTAATAAGGTGGGT      |
| pET28a-PSPPH_1906-F    | AGCAAATGGGTGCGGGATCCATGACTGACACTGTGCGA     |
| pET28a-PSPPH_1906-R    | CGGAGCTCGAATTCGGATCCTCATGCCACTCGCTCGT      |
| pET28a-PSPPH_4419-F    | AGCAAATGGGTGCGGGATCCATGGATAACTACCCGGTC     |
| pET28a-PSPPH_4419-R    | CGGAGCTCGAATTCGGATCCTCAGTCCTGGCTTTCGATC    |

|                         |                                                 |
|-------------------------|-------------------------------------------------|
| pET28a- <i>kdpE</i> -F  | AGCAAATGGGTCGCGGATCCATGAGCCAGGCGGCAA            |
| pET28a- <i>kdpE</i> -R  | CGGAGCTCGAATTCGGATCCTTAGTGGTCGGCCATCAG          |
| pET28a- <i>cvsR</i> -F  | AGCAAATGGGTCGCGGATCCATGCGAATTCTTCTGGTTG         |
| pET28a- <i>cvsR</i> -R  | CGGAGCTCGAATTCGGATCCTTAAACTCCATCCCGGCC          |
| pET28a- <i>colR</i> -F  | AGCAAATGGGTCGCGGATCCATGACCTCCATGACCACCG         |
| pET28a- <i>colR</i> -R  | CGGAGCTCGAATTCGGATCCTCAAAGCTCGAGCTTGTA          |
| pET28a- <i>baeS1</i> -F | AGCAAATGGGTCGCGGATCCATGAATGTCTGATCGTTGAT        |
| pET28a- <i>baeS1</i> -R | CGGAGCTCGAATTCGGATCCTTAGAGCTGCTGCATCATCTT       |
| pET28a- <i>algR</i> -F  | AGCAAATGGGTCGCGGATCCATGAGCGAGCTGTTACTAATTG      |
| pET28a- <i>algR</i> -R  | CGGAGCTCGAATTCGGATCCTTACAAAGCATAATAATAGCCGCG    |
| pET28a-PSPPH_3547-F     | AGCAAATGGGTCGCGGATCCATGACCCGAATTCTGGCAA         |
| pET28a-PSPPH_3547-R     | CGGAGCTCGAATTCGGATCCTTAGACGGGTTTCGGCAAT         |
| pET28a-PSPPH_3040-F     | AGCAAATGGGTCGCGGATCCATGCGCGTGCTGATTATCG         |
| pET28a-PSPPH_3040-R     | CGGAGCTCGAATTCGGATCCTTAACCCGCACTGCGG            |
| pET28a-PSPPH_1195-F     | AGCAAATGGGTCGCGGATCCATGCGCCTGCTTCTTGTCG         |
| pET28a-PSPPH_1195-R     | CGGAGCTCGAATTCGGATCCTTATGCCTTGAGCTCCAGC         |
| pET28a-PSPPH_3453-F     | AGCAAATGGGTCGCGGATCCATGCGAATCCTTGTCGTAGA        |
| pET28a-PSPPH_3453-R     | CGGAGCTCGAATTCGGATCCTTATTCACGCACTTCCAGC         |
| pET28a-PSPPH_4828-F     | AGCAAATGGGTCGCGGATCCATGAGCAGCACCGCACAA          |
| pET28a-PSPPH_4828-R     | CGGAGCTCGAATTCGGATCCTTAGCGATTACCAGCACCAT        |
| pET28a- <i>ompR</i> -F  | AGCAAATGGGTCGCGGATCCATGCGTGTTCTTCTTGTTGA        |
| pET28a- <i>ompR</i> -R  | CGGAGCTCGAATTCGGATCCTTAATCATCGCGGCTTTCAA        |
| pET28a- <i>tctD</i> -F  | AGCAAATGGGTCGCGGATCCATGCATATCCTGCTGATTGAAGAC    |
| pET28a- <i>tctD</i> -R  | CGGAGCTCGAATTCGGATCCTTAGGGAAGGCTGGCGT           |
| pET28a-PSPPH_3294-F     | AGCAAATGGGTCGCGGATCCATGAACATTCTGGTTATTGAAGATCAC |
| pET28a-PSPPH_3294-R     | CGGAGCTCGAATTCGGATCCTTAGCGCTGGACACACAA          |
| pET28a-PSPPH_2995-F     | AGCAAATGGGTCGCGGATCCATGAGTTCAGTCAGTAAATCGATC    |
| pET28a-PSPPH_2995-R     | CGGAGCTCGAATTCGGATCCTTAATAGCCGTTGCCCGC          |
| pET28a- <i>gltR</i> -F  | AGCAAATGGGTCGCGGATCCATGGCTGGCAGGAGCAT           |
| pET28a- <i>gltR</i> -R  | CGGAGCTCGAATTCGGATCCTTAGCTCTTTGTGCGAGAAGC       |
| pET28a- <i>phoB</i> -F  | AGCAAATGGGTCGCGGATCCATGAAGTTGTTGGTAGTTGAGGA     |
| pET28a- <i>phoB</i> -R  | CGGAGCTCGAATTCGGATCCTTACGTACAGCGCTCATTG         |
| pET28a- <i>phoP</i> -F  | AGCAAATGGGTCGCGGATCCATGGAGCCACACACCTG           |
| pET28a- <i>phoP</i> -R  | CGGAGCTCGAATTCGGATCCTTAGCCGCTGAACACGT           |
| pET28a- <i>rstA</i> -F  | AGCAAATGGGTCGCGGATCCATGAGTGACGAAGACATCCA        |
| pET28a- <i>rstA</i> -R  | CGGAGCTCGAATTCGGATCCTTAACGCCGCACAGGG            |
| pET28a-PSPPH_4255-F     | AGCAAATGGGTCGCGGATCCATGCCTGACAGCCGAG            |
| pET28a-PSPPH_4255-R     | CGGAGCTCGAATTCGGATCCTTAGACGGATGCAGCG            |
| pET28a-PSPPH_4841-F     | AGCAAATGGGTCGCGGATCCATGCCTTCCACACACTG           |
| pET28a-PSPPH_4841-R     | CGGAGCTCGAATTCGGATCCTTAGTCTGGAAGGTTTGA          |
| pET28a-PSPPH_4692-F     | AGCAAATGGGTCGCGGATCCATGAGCACCATCCACTCC          |
| pET28a-PSPPH_4692-R     | CGGAGCTCGAATTCGGATCCTTACAACCGATACTGCC           |
| pET28a-PSPPH_2862-F     | AGCAAATGGGTCGCGGATCCATGGGCGAATCTGCC             |
| pET28a-PSPPH_2862-R     | CGGAGCTCGAATTCGGATCCTTAGCAGCCCTTGAAG            |
| pET28a-PSPPH_1580-F     | AGCAAATGGGTCGCGGATCCATGTCCGAGCCAGTAAAGT         |
| pET28a-PSPPH_1580-R     | CGGAGCTCGAATTCGGATCCTTAGCTTTGGATTGCGC           |

|                        |                                                  |
|------------------------|--------------------------------------------------|
| pET28a-anr-F           | AGCAAATGGGTCGCGGATCCATGGTCGCAATAACTTTAACGC       |
| pET28a-anr-R           | CGGAGCTCGAATTCGGATCCTTAGCGCGTACCGTACAC           |
| pET28a-vfr-F           | AGCAAATGGGTCGCGGATCCATGCCGACTAACGGACAA           |
| pET28a-vfr-R           | CGGAGCTCGAATTCGGATCCTTACTTGAACAAATCACCGGGC       |
| pET28a-PSPPH_4646-F    | AGCAAATGGGTCGCGGATCCATGGCCAGACCTGCCAC            |
| pET28a-PSPPH_4646-R    | CGGAGCTCGAATTCGGATCCTTATTTCTGCTGACGAAACGCTT      |
| pET28a-pobR-F          | AGCAAATGGGTCGCGGATCCATGAAGCTTGAGCAATACCTGG       |
| pET28a-pobR-R          | CGGAGCTCGAATTCGGATCCTTAATCGCCCTGCGCA             |
| pET28a-PSPPH_2917-F    | AGCAAATGGGTCGCGGATCCATGCACAAAGAAAATTCCCCGC       |
| pET28a-PSPPH_2917-R    | CGGAGCTCGAATTCGGATCCTTAGAGCACGACGTTACG           |
| pET28a-PSPPH_3170-F    | AGCAAATGGGTCGCGGATCCATGGCTGATCGTCAGAGC           |
| pET28a-PSPPH_3170-R    | CGGAGCTCGAATTCGGATCCTTAGGCTTCGGCTTGAAC           |
| pET28a-PSPPH_1160-F    | AGCAAATGGGTCGCGGATCCATGGCGATGCTTAACGGAAA         |
| pET28a-PSPPH_1160-R    | CGGAGCTCGAATTCGGATCCTTAAGCGTGTGCATGTTTCCAG       |
| pET28a-cspD-F          | AGCAAATGGGTCGCGGATCCATGTCCAATCGCCAACTGG          |
| pET28a-cspD-R          | CGGAGCTCGAATTCGGATCCTTAGATAACTTGAACCTTCTTCAGCTTG |
| pET28a-capB-F          | AGCAAATGGGTCGCGGATCCATGTCTAATCGCCAAACCGG         |
| pET28a-capB-R          | CGGAGCTCGAATTCGGATCCTTAGTCAACGCGGACTTGTT         |
| pET28a-capA-F          | AGCAAATGGGTCGCGGATCCATGGGAAATCGTGATACTGGC        |
| pET28a-capA-R          | CGGAGCTCGAATTCGGATCCTTAGCGGCGGGGC                |
| pET28a-PSPPH_3779-F    | AGCAAATGGGTCGCGGATCCATGAGCCCTATGAAACAGGC         |
| pET28a-PSPPH_3779-R    | CGGAGCTCGAATTCGGATCCTTAGGACTCTTCGGAAGCGA         |
| pET28a-PSPPH_3504-F    | AGCAAATGGGTCGCGGATCCATGAATAACAATAAGCGCCCCA       |
| pET28a-PSPPH_3504-R    | CGGAGCTCGAATTCGGATCCTTAGGCGTCGGTATTCTCC          |
| pET28a-PSPPH_2338-F    | AGCAAATGGGTCGCGGATCCATGATCCGCATTGGTTCCCG         |
| pET28a-PSPPH_2338-R    | CGGAGCTCGAATTCGGATCCTTAGGAGCTTTCCCGTACCA         |
| pET28a-gntR-F          | AGCAAATGGGTCGCGGATCCATGGCGACTATCAAGGATGTC        |
| pET28a-gntR-R          | CGGAGCTCGAATTCGGATCCTTATTCATTGGACAAAGTGTTCCG     |
| pET28a- <i>rrsB</i> -F | AGCAAATGGGTCGCGGATCCATGAAACTGAGCGATATCGC         |
| pET28a- <i>rrsB</i> -R | CGGAGCTCGAATTCGGATCCTTACACCTCGTGAATACGTT         |
| pET28a- <i>fruR</i> -F | AGCAAATGGGTCGCGGATCCATGACCTCAGTTAAAGACGTTG       |
| pET28a- <i>fruR</i> -R | CGGAGCTCGAATTCGGATCCTTATAACGATTCCCTCACCAC        |
| pET28a-PSPPH_5193-F    | AGCAAATGGGTCGCGGATCCATGGTAACGCAGACCGGT           |
| pET28a-PSPPH_5193-R    | CGGAGCTCGAATTCGGATCCTTACTGAGGCTGAGCATGAA         |
| pET28a-PSPPH_4730-F    | AGCAAATGGGTCGCGGATCCATGGCCGACGAGAAACCC           |
| pET28a-PSPPH_4730-R    | CGGAGCTCGAATTCGGATCCTTATGTACTCTCGCGCTCTA         |
| pET28a-PSPPH_4858-F    | AGCAAATGGGTCGCGGATCCATGAATACATCAGGCGATCGA        |
| pET28a-PSPPH_4858-R    | CGGAGCTCGAATTCGGATCCTTACAACAGCAGCATCGC           |
| pET28a-PSPPH_4673-F    | AGCAAATGGGTCGCGGATCCATGGGCGTGCCCG                |
| pET28a-PSPPH_4673-R    | CGGAGCTCGAATTCGGATCCTTATAGCCTGGCGGTCATT          |
| pET28a-PSPPH_1393-F    | AGCAAATGGGTCGCGGATCCATGAACAGAAAATGGTATGAAGTC     |
| pET28a-PSPPH_1393-R    | CGGAGCTCGAATTCGGATCCTTAGAGACGCATCGTCAT           |
| pET28a-PSPPH_0653-F    | AGCAAATGGGTCGCGGATCCATGACGAAGAAACGCATCCT         |
| pET28a-PSPPH_0653-R    | CGGAGCTCGAATTCGGATCCTTAAACTAGGTTAGCATTCCAGAC     |
| pET28a-PSPPH_2151-F    | AGCAAATGGGTCGCGGATCCATGGACAATCCATTCCAAC          |
| pET28a-PSPPH_2151-R    | CGGAGCTCGAATTCGGATCCTTAAAAATTCGCCGGTGTG          |

|                        |                                               |
|------------------------|-----------------------------------------------|
| pET28a-PSPPH_2478-F    | AGCAAATGGGTGCGGGATCCATGGACGTGGGTGAACGA        |
| pET28a-PSPPH_2478-R    | CGGAGCTCGAATTCGGATCCTTAGAAATTGGCTGGCGTT       |
| pET28a-PSPPH_0226-F    | AGCAAATGGGTGCGGGATCCATGAGCCAAGCCGCGT          |
| pET28a-PSPPH_0226-R    | CGGAGCTCGAATTCGGATCCTTACCGGCCAGTGTC           |
| pET28a-PSPPH_5057-F    | AGCAAATGGGTGCGGGATCCATGGACAAGTTGGCGAAAG       |
| pET28a-PSPPH_5057-R    | CGGAGCTCGAATTCGGATCCTTAGGCGGGTTGCAGC          |
| pET28a-PSPPH_4324-F    | AGCAAATGGGTGCGGGATCCATGGATCTTCAAGTGATATCCCG   |
| pET28a-PSPPH_4324-R    | CGGAGCTCGAATTCGGATCCTTACGACTCGCCTCGC          |
| pET28a-PSPPH_1584-F    | AGCAAATGGGTGCGGGATCCATGGACTATTCCTCATCACAAC    |
| pET28a-PSPPH_1584-R    | CGGAGCTCGAATTCGGATCCTTAGTGAATACTCCCTCAAT      |
| pET28a-PSPPH_4694-F    | AGCAAATGGGTGCGGGATCCATGAGCATCGGCGAAAATCT      |
| pET28a-PSPPH_4694-R    | CGGAGCTCGAATTCGGATCCTTACGCCACATCGTTTTCT       |
| pET28a-PSPPH_2792-F    | AGCAAATGGGTGCGGGATCCATGAGTGAATCGGTTGTGCG      |
| pET28a-PSPPH_2792-R    | CGGAGCTCGAATTCGGATCCTTAAGGAAGCTTTTCAGGAGCG    |
| pET28a-PSPPH_2327-F    | AGCAAATGGGTGCGGGATCCATGTGTGGCAACAAGCCT        |
| pET28a-PSPPH_2327-R    | CGGAGCTCGAATTCGGATCCTTACTTCAACTTCGAGGTCA      |
| pET28a-PSPPH_2194-F    | AGCAAATGGGTGCGGGATCCATGAAAACCGTCCATAACGC      |
| pET28a-PSPPH_2194-R    | CGGAGCTCGAATTCGGATCCTTACGAGCTAAGTAAGCGC       |
| pET28a-PSPPH_4674-F    | AGCAAATGGGTGCGGGATCCATGGAATTGAAGGAAGCATTGTC   |
| pET28a-PSPPH_4674-R    | CGGAGCTCGAATTCGGATCCTTACACTTCCAGCGTATCGC      |
| pET28a-PSPPH_2800-F    | AGCAAATGGGTGCGGGATCCATGAACATCGGTCAGGCGG       |
| pET28a-PSPPH_2800-R    | CGGAGCTCGAATTCGGATCCTTAGCAACCCACTCCCGA        |
| pET28a-PSPPH_4644-F    | AGCAAATGGGTGCGGGATCCATGCTGGAACCAAGTCATAAC     |
| pET28a-PSPPH_4644-R    | CGGAGCTCGAATTCGGATCCTTACGCTTTGAGCATAACCAG     |
| pET28a-PSPPH_2142-F    | AGCAAATGGGTGCGGGATCCATGAATGAAACAGACACAGAGGT   |
| pET28a-PSPPH_2142-R    | CGGAGCTCGAATTCGGATCCTTAGATAAGTCCGAGCTTGCC     |
| pET28a-PSPPH_1011-F    | AGCAAATGGGTGCGGGATCCATGAGCAGTCAGACTTACAGC     |
| pET28a-PSPPH_1011-R    | CGGAGCTCGAATTCGGATCCTTAGTGTGAAGTGGCAGC        |
| pET28a-PSPPH_2630-F    | AGCAAATGGGTGCGGGATCCATGAAAATCGGCGAACTGG       |
| pET28a-PSPPH_2630-R    | CGGAGCTCGAATTCGGATCCTTAATGCCCATGACTCCTC       |
| pET28a- <i>cadR</i> -F | AGCAAATGGGTGCGGGATCCATGGTCGATATCAGAACACGTG    |
| pET28a- <i>cadR</i> -R | CGGAGCTCGAATTCGGATCCTTAATGCACCGCCGG           |
| pET28a-PSPPH_2539-F    | AGCAAATGGGTGCGGGATCCATGCTTCGCGACAACG          |
| pET28a-PSPPH_2539-R    | CGGAGCTCGAATTCGGATCCTTACTCCACAAAATAACCC       |
| pET28a-PSPPH_2015-F    | AGCAAATGGGTGCGGGATCCATGGATACCACCATCGTATGC     |
| pET28a-PSPPH_2015-R    | CGGAGCTCGAATTCGGATCCTTAGCAAATCGCCGCC          |
| pET28a-PSPPH_2149-F    | AGCAAATGGGTGCGGGATCCATGACTCAGGACATCGAAAGC     |
| pET28a-PSPPH_2149-R    | CGGAGCTCGAATTCGGATCCTTAGTTTGACGGACGGCT        |
| pET28a- <i>iclR</i> -F | AGCAAATGGGTGCGGGATCCATGAACGATGAACTGCGTA       |
| pET28a- <i>iclR</i> -R | CGGAGCTCGAATTCGGATCCTTAGGTAAACAGCTGCGT        |
| pET28a- <i>pcaR</i> -F | AGCAAATGGGTGCGGGATCCATGCACAACGATTGATCAT       |
| pET28a- <i>pcaR</i> -R | CGGAGCTCGAATTCGGATCCTTAGCCGCCGAGATCG          |
| pET28a-PSPPH_1960-F    | AGCAAATGGGTGCGGGATCCATGACTGAAGACACAATCAAGC    |
| pET28a-PSPPH_1960-R    | CGGAGCTCGAATTCGGATCCTTATTCGTTGATTGACGAGC      |
| pET28a-PSPPH_2665-F    | AGCAAATGGGTGCGGGATCCATGAATAATTCTACTGATCGGAATA |
| pET28a-PSPPH_2665-R    | CGGAGCTCGAATTCGGATCCTTAATCCGCCTGCCCG          |

|                        |                                               |
|------------------------|-----------------------------------------------|
| pET28a-PSPPH_2832-F    | AGCAAATGGGTGCGGGATCCATGCTGACCTTGTTAAAGCTT     |
| pET28a-PSPPH_2832-R    | CGGAGCTCGAATTCGGATCCTTAAGAATCATCTCGCAACC      |
| pET28a-PSPPH_4612-F    | AGCAAATGGGTGCGGGATCCATGGAAGGCTTGGTCAAAC       |
| pET28a-PSPPH_4612-R    | CGGAGCTCGAATTCGGATCCTTAATGGCGCAACAGTTTG       |
| pET28a-PSPPH_5042-F    | AGCAAATGGGTGCGGGATCCATGAGCAAGCTCGACAGA        |
| pET28a-PSPPH_5042-R    | CGGAGCTCGAATTCGGATCCTTAGTTGCGCAAATGGGT        |
| pET28a-PSPPH_4377-F    | AGCAAATGGGTGCGGGATCCATGCAGCCTAAATTGAGCC       |
| pET28a-PSPPH_4377-R    | CGGAGCTCGAATTCGGATCCTTAGTCCAGCGGCAACTC        |
| pET28a-PSPPH_2219-F    | AGCAAATGGGTGCGGGATCCATGACCTCGCCGACGTT         |
| pET28a-PSPPH_2219-R    | CGGAGCTCGAATTCGGATCCTTAGGCCGAAGTTTGAC         |
| pET28a-PSPPH_1244-F    | AGCAAATGGGTGCGGGATCCATGAAATTCATCATGAAAGCAATA  |
| pET28a-PSPPH_1244-R    | CGGAGCTCGAATTCGGATCCTTAAATGGGTAATTGCGTGGT     |
| pET28a-PSPPH_1762-F    | AGCAAATGGGTGCGGGATCCATGGACAAATTCGACCGG        |
| pET28a-PSPPH_1762-R    | CGGAGCTCGAATTCGGATCCTTAGCCGCCAAACGAT          |
| pET28a-PSPPH_5054-F    | AGCAAATGGGTGCGGGATCCATGCCCGATACCCGC           |
| pET28a-PSPPH_5054-R    | CGGAGCTCGAATTCGGATCCTTATACCGGCTGGCCG          |
| pET28a-PSPPH_4700-F    | AGCAAATGGGTGCGGGATCCATGACGCTGGATAAATACGAT     |
| pET28a-PSPPH_4700-R    | CGGAGCTCGAATTCGGATCCTTAGTATTCTGATTGCCGTT      |
| pET28a-PSPPH_4356-F    | AGCAAATGGGTGCGGGATCCATGCGCACTCAACACCA         |
| pET28a-PSPPH_4356-R    | CGGAGCTCGAATTCGGATCCTTAGTCGGCAATCGGCA         |
| pET28a- <i>lrp</i> -F  | AGCAAATGGGTGCGGGATCCATGCAAACCGAGCTGGA         |
| pET28a- <i>lrp</i> -R  | CGGAGCTCGAATTCGGATCCTTAGCCACCCTGGCG           |
| pET28a-PSPPH_0239-F    | AGCAAATGGGTGCGGGATCCATGAACGTCAAGCAGCTTC       |
| pET28a-PSPPH_0239-R    | CGGAGCTCGAATTCGGATCCTTATCGACTATTGCGAGCATC     |
| pET28a-PSPPH_3155-F    | AGCAAATGGGTGCGGGATCCATGCAACTCTACGGCGTAC       |
| pET28a-PSPPH_3155-R    | CGGAGCTCGAATTCGGATCCTTAGGTCTTTGCCAGCTC        |
| pET28a-PSPPH_2921-F    | AGCAAATGGGTGCGGGATCCATGCACATCAATCTCTGGGA      |
| pET28a-PSPPH_2921-R    | CGGAGCTCGAATTCGGATCCTTACTGGCGGTACTIONCATCG    |
| pET28a-PSPPH_3817-F    | AGCAAATGGGTGCGGGATCCATGAAGTTCAGTCTGCGAC       |
| pET28a-PSPPH_3817-R    | CGGAGCTCGAATTCGGATCCTTAGACAAAAGGTACTCTTTC     |
| pET28a-PSPPH_2301-F    | AGCAAATGGGTGCGGGATCCATGGACCTGCGCGATCT         |
| pET28a-PSPPH_2301-R    | CGGAGCTCGAATTCGGATCCTTACCCCAACCCAGAA          |
| pET28a-PSPPH_3022-F    | AGCAAATGGGTGCGGGATCCATGTTCGACTACAAATTGTTATCTG |
| pET28a-PSPPH_3022-R    | CGGAGCTCGAATTCGGATCCTTAGTCTTCGCTCAGCG         |
| pET28a- <i>iciA</i> -F | AGCAAATGGGTGCGGGATCCATGCCCATCAATTTGACCT       |
| pET28a- <i>iciA</i> -R | CGGAGCTCGAATTCGGATCCTTAGTTCCCCGCTGAAC         |
| pET28a-PSPPH_3079-F    | AGCAAATGGGTGCGGGATCCATGACTGAACGTATACCGCC      |
| pET28a-PSPPH_3079-R    | CGGAGCTCGAATTCGGATCCTTAAGGTGCCGCGA            |
| pET28a-PSPPH_3464-F    | AGCAAATGGGTGCGGGATCCATGCTTGAATACGCCAC         |
| pET28a-PSPPH_3464-R    | CGGAGCTCGAATTCGGATCCTTAGCGAACCACGCTAA         |
| pET28a- <i>metR</i> -F | AGCAAATGGGTGCGGGATCCATGGACATCAAGCAACTTAAG     |
| pET28a- <i>metR</i> -R | CGGAGCTCGAATTCGGATCCTTAGCGCGGCATTTCT          |
| pET28a-PSPPH_0141-F    | AGCAAATGGGTGCGGGATCCATGAGACTCAACCTGCG         |
| pET28a-PSPPH_0141-R    | CGGAGCTCGAATTCGGATCCTTACGGCGCTTTGCTG          |
| pET28a-PSPPH_3233-F    | AGCAAATGGGTGCGGGATCCATGGCAAGCACAGCTGAC        |
| pET28a-PSPPH_3233-R    | CGGAGCTCGAATTCGGATCCTTACTCCGGCGTCTGCTA        |



|                        |                                               |
|------------------------|-----------------------------------------------|
| pET28a-PSPPH_3990-F    | AGCAAATGGGTGCGGGATCCATGAGCAGAATCTTCAACG       |
| pET28a-PSPPH_3990-R    | CGGAGCTCGAATTCGGATCCTTAGATCACTGCTTCGTTCA      |
| pET28a-PSPPH_3460-F    | AGCAAATGGGTGCGGGATCCATGGACACCCTGCAAAAC        |
| pET28a-PSPPH_3460-R    | CGGAGCTCGAATTCGGATCCTTAGAACGAGGACTTGAG        |
| pET28a-PSPPH_1100-F    | AGCAAATGGGTGCGGGATCCATGGACCGTTTTGACGC         |
| pET28a-PSPPH_1100-R    | CGGAGCTCGAATTCGGATCCTTACGATTGCTCGGCTC         |
| pET28a-PSPPH_2439-F    | AGCAAATGGGTGCGGGATCCATGAATATTGATACCCGCATCA    |
| pET28a-PSPPH_2439-R    | CGGAGCTCGAATTCGGATCCTTATGCATACTGCGTTTTCC      |
| pET28a- <i>pcaQ</i> -F | AGCAAATGGGTGCGGGATCCATGAGCCGCGACCTTC          |
| pET28a- <i>pcaQ</i> -R | CGGAGCTCGAATTCGGATCCTTAGTTTTTGATCGGTTCC       |
| pET28a- <i>trpI</i> -F | AGCAAATGGGTGCGGGATCCATGAATTATCCAAACCTTGATG    |
| pET28a- <i>trpI</i> -R | CGGAGCTCGAATTCGGATCCTTAGCGGTTTGCCGG           |
| pET28a-PSPPH_2555-F    | AGCAAATGGGTGCGGGATCCATGAAAATTGATGATATCGATGCGT |
| pET28a-PSPPH_2555-R    | CGGAGCTCGAATTCGGATCCTTAGGCGGCTGCTGAA          |
| pET28a-PSPPH_3611-F    | AGCAAATGGGTGCGGGATCCATGAAAGCCAGATCTGATGA      |
| pET28a-PSPPH_3611-R    | CGGAGCTCGAATTCGGATCCTTACCTGCGCACAAACG         |
| pET28a-PSPPH_0711-F    | AGCAAATGGGTGCGGGATCCATGAATCGTAACGACCTGCG      |
| pET28a-PSPPH_0711-R    | CGGAGCTCGAATTCGGATCCTTATAAACTATCCGGATCC       |
| pET28a- <i>mexT</i> -F | AGCAAATGGGTGCGGGATCCATGTTTCGAGCTTTCTCAACT     |
| pET28a- <i>mexT</i> -R | CGGAGCTCGAATTCGGATCCTTAATTTTCATCCACCCTGA      |
| pET28a-PSPPH_2469-F    | AGCAAATGGGTGCGGGATCCATGAGCGTCCGTCGC           |
| pET28a-PSPPH_2469-R    | CGGAGCTCGAATTCGGATCCTTATCGGGTAGCGGC           |
| pET28a-PSPPH_4620-F    | AGCAAATGGGTGCGGGATCCATGCGCCATCTCGATAC         |
| pET28a-PSPPH_4620-R    | CGGAGCTCGAATTCGGATCCTTACAAGGCTGCCATCG         |
| pET28a-PSPPH_2772-F    | AGCAAATGGGTGCGGGATCCATGGATCGATTCAACGCC        |
| pET28a-PSPPH_2772-R    | CGGAGCTCGAATTCGGATCCTTAGGAAACCAGTCTGTC        |
| pET28a-PSPPH_2638-F    | AGCAAATGGGTGCGGGATCCATGAAGCTCCAACAACCTGC      |
| pET28a-PSPPH_2638-R    | CGGAGCTCGAATTCGGATCCTTAGTGCACCGGCAGT          |
| pET28a- <i>cysB</i> -F | AGCAAATGGGTGCGGGATCCATGCTTATGGATTTGCGTC       |
| pET28a- <i>cysB</i> -R | CGGAGCTCGAATTCGGATCCTTACTCGGCATAAATGCTC       |
| pET28a-PSPPH_2693-F    | AGCAAATGGGTGCGGGATCCATGCTGTCCACTGACC          |
| pET28a-PSPPH_2693-R    | CGGAGCTCGAATTCGGATCCTTAATCCACCCGCAACG         |
| pET28a-PSPPH_1493-F    | AGCAAATGGGTGCGGGATCCATGAGACCGGTGAATTTCGA      |
| pET28a-PSPPH_1493-R    | CGGAGCTCGAATTCGGATCCTTAGGCGATCTCGCTT          |
| pET28a-PSPPH_4998-F    | AGCAAATGGGTGCGGGATCCATGCAGCCTGATGACGAT        |
| pET28a-PSPPH_4998-R    | CGGAGCTCGAATTCGGATCCTTAAAACTCAAACCCCTGC       |
| pET28a-PSPPH_1259-F    | AGCAAATGGGTGCGGGATCCATGCGATTTACTCTCCGC        |
| pET28a-PSPPH_1259-R    | CGGAGCTCGAATTCGGATCCTTAATACAGGCTTGCGAG        |
| pET28a-PSPPH_3798-F    | AGCAAATGGGTGCGGGATCCATGTCCCTGACGTTGC          |
| pET28a-PSPPH_3798-R    | CGGAGCTCGAATTCGGATCCTTAACGCCGCGCC             |
| pET28a-PSPPH_2444-F    | AGCAAATGGGTGCGGGATCCATGACTCTTACAGAATTACGCTA   |
| pET28a-PSPPH_2444-R    | CGGAGCTCGAATTCGGATCCTTAACTTGCGACTGTTTTCG      |
| pET28a- <i>oxyR</i> -F | AGCAAATGGGTGCGGGATCCATGTTGCGCTTTGACGAC        |
| pET28a- <i>oxyR</i> -R | CGGAGCTCGAATTCGGATCCTTAAACAACCCAACGGGTG       |
| pET28a-PSPPH_4638-F    | AGCAAATGGGTGCGGGATCCATGATCAGCATGGAAATGTTG     |
| pET28a-PSPPH_4638-R    | CGGAGCTCGAATTCGGATCCTTACCAGCATCCGTGT          |

|                     |                                               |
|---------------------|-----------------------------------------------|
| pET28a-PSPPH_0700-F | AGCAAATGGGTTCGCGGATCCATGAAAGCGCCCCGC          |
| pET28a-PSPPH_0700-R | CGGAGCTCGAATTCGGATCCTTAGGCGTGTGTGGA           |
| pET28a-PSPPH_1435-F | AGCAAATGGGTTCGCGGATCCATGGCGCTTGACCTCA         |
| pET28a-PSPPH_1435-R | CGGAGCTCGAATTCGGATCCTTATTGCGCCGCAA            |
| pET28a-PSPPH_2193-F | AGCAAATGGGTTCGCGGATCCATGCGTATGACATTGCGT       |
| pET28a-PSPPH_2193-R | CGGAGCTCGAATTCGGATCCTTAAGTTGCCGCGG            |
| pET28a-PSPPH_5144-F | AGCAAATGGGTTCGCGGATCCATGCTGTTACGCCATATACG     |
| pET28a-PSPPH_5144-R | CGGAGCTCGAATTCGGATCCTTAGATATCACTACCAGTTTG     |
| pET28a-PSPPH_3411-F | AGCAAATGGGTTCGCGGATCCATGCCTGAGCGCCC           |
| pET28a-PSPPH_3411-R | CGGAGCTCGAATTCGGATCCTTACTCTCCGGCAAACG         |
| pET28a-PSPPH_3278-F | AGCAAATGGGTTCGCGGATCCATGCGTATCGAGCCCC         |
| pET28a-PSPPH_3278-R | CGGAGCTCGAATTCGGATCCTTAGGGCCGGTGTGT           |
| pET28a-PSPPH_2688-F | AGCAAATGGGTTCGCGGATCCATGGACAGGCTCAAGGC        |
| pET28a-PSPPH_2688-R | CGGAGCTCGAATTCGGATCCTTATCGGTCTTGAAGAGAGG      |
| pET28a-PSPPH_1737-F | AGCAAATGGGTTCGCGGATCCATGGATCTCGCCAACCTT       |
| pET28a-PSPPH_1737-R | CGGAGCTCGAATTCGGATCCTTATGTCTGCGCATCGAG        |
| pET28a-PSPPH_1951-F | AGCAAATGGGTTCGCGGATCCATGAGCGCAATTCTCGAT       |
| pET28a-PSPPH_1951-R | CGGAGCTCGAATTCGGATCCTTAAAGCCGAAAATACTTCTG     |
| pET28a-PSPPH_1758-F | AGCAAATGGGTTCGCGGATCCATGCAGATCGATGACGAA       |
| pET28a-PSPPH_1758-R | CGGAGCTCGAATTCGGATCCTTAGGTTCGCTGCTC           |
| pET28a-PSPPH_0442-F | AGCAAATGGGTTCGCGGATCCATGAATCGAAATGAACTGCG     |
| pET28a-PSPPH_0442-R | CGGAGCTCGAATTCGGATCCTTAGCCTGCCAGGG            |
| pET28a-PSPPH_3014-F | AGCAAATGGGTTCGCGGATCCATGCTCAATTACCGTCAGC      |
| pET28a-PSPPH_3014-R | CGGAGCTCGAATTCGGATCCTTAACTTGCCTCGGTAAAC       |
| pET28a-PSPPH_2580-F | AGCAAATGGGTTCGCGGATCCATGAACCCTTTTGAAGACATG    |
| pET28a-PSPPH_2580-R | CGGAGCTCGAATTCGGATCCTTAGCCAGGCGGTTT           |
| pET28a-PSPPH_3618-F | AGCAAATGGGTTCGCGGATCCATGAACCTGAGCAAGGTC       |
| pET28a-PSPPH_3618-R | CGGAGCTCGAATTCGGATCCTTATGCTTTCTCGAGGCC        |
| pET28a-PSPPH_2631-F | AGCAAATGGGTTCGCGGATCCATGCCTCGCAGTCTCC         |
| pET28a-PSPPH_2631-R | CGGAGCTCGAATTCGGATCCTTAAATGCAGTACTTCAACTAACGG |
| pET28a-PSPPH_0077-F | AGCAAATGGGTTCGCGGATCCATGCAATATGAAATCACCCATG   |
| pET28a-PSPPH_0077-R | CGGAGCTCGAATTCGGATCCTTAGGCGGATCTGGAC          |
| pET28a-PSPPH_2476-F | AGCAAATGGGTTCGCGGATCCATGTTTGATCTCAATGATCTGTT  |
| pET28a-PSPPH_2476-R | CGGAGCTCGAATTCGGATCCTTAGTGGTCTTGAATGCG        |
| pET28a-PSPPH_2236-F | AGCAAATGGGTTCGCGGATCCATGGATCGGATCATGGCG       |
| pET28a-PSPPH_2236-R | CGGAGCTCGAATTCGGATCCTTAAAGGCTCTGCGCC          |
| pET28a-PSPPH_2967-F | AGCAAATGGGTTCGCGGATCCATGCTGAACAAACGTCATC      |
| pET28a-PSPPH_2967-R | CGGAGCTCGAATTCGGATCCTTAAACGGGCCGGTTGAT        |
| pET28a-PSPPH_0589-F | AGCAAATGGGTTCGCGGATCCATGAACCAGACACAGGACC      |
| pET28a-PSPPH_0589-R | CGGAGCTCGAATTCGGATCCTTAAATGCGGGTCTTGCA        |
| pET28a-PSPPH_1579-F | AGCAAATGGGTTCGCGGATCCATGAACCTTCGCCGCT         |
| pET28a-PSPPH_1579-R | CGGAGCTCGAATTCGGATCCTTACTCTGTACGGCGATTG       |
| pET28a-PSPPH_2454-F | AGCAAATGGGTTCGCGGATCCATGGATCTGGTTCAGCTGG      |
| pET28a-PSPPH_2454-R | CGGAGCTCGAATTCGGATCCTTATCCGGCTTGCGG           |
| pET28a-PSPPH_2553-F | AGCAAATGGGTTCGCGGATCCATGCTCAACAGTAATGCCCT     |
| pET28a-PSPPH_2553-R | CGGAGCTCGAATTCGGATCCTTAGAGCAGACCGCG           |

|                     |                                               |
|---------------------|-----------------------------------------------|
| pET28a-PSPPH_3241-F | AGCAAATGGGTTCGCGGATCCATGAATCTGGAAAGCAAATGGC   |
| pET28a-PSPPH_3241-R | CGGAGCTCGAATTCGGATCCTTATGCTTCGCCCGGC          |
| pET28a-PSPPH_5132-F | AGCAAATGGGTTCGCGGATCCATGAACACCAGGAGACTGA      |
| pET28a-PSPPH_5132-R | CGGAGCTCGAATTCGGATCCTTACAAAGGGTTCGGGAAAC      |
| pET28a-PSPPH_2689-F | AGCAAATGGGTTCGCGGATCCATGGAATTGCGCCATCTG       |
| pET28a-PSPPH_2689-R | CGGAGCTCGAATTCGGATCCTTATCGTGCGACATTGCG        |
| pET28a-PSPPH_0411-F | AGCAAATGGGTTCGCGGATCCATGCCCATGATCAAAGAACT     |
| pET28a-PSPPH_0411-R | CGGAGCTCGAATTCGGATCCTTAACGAGTCAGAGCGTGT       |
| pET28a-PSPPH_2300-F | AGCAAATGGGTTCGCGGATCCATGAGCCTGGTGCAAGAT       |
| pET28a-PSPPH_2300-R | CGGAGCTCGAATTCGGATCCTTAATTGCGAAACGCCG         |
| pET28a-PSPPH_3468-F | AGCAAATGGGTTCGCGGATCCATGGATTTGTTTCAGGCGAT     |
| pET28a-PSPPH_3468-R | CGGAGCTCGAATTCGGATCCTTACCGCCCCAGAG            |
| pET28a-PSPPH_2491-F | AGCAAATGGGTTCGCGGATCCATGGCCAATATCCAGGC        |
| pET28a-PSPPH_2491-R | CGGAGCTCGAATTCGGATCCTTAAGGTTTGAAGCCGTC        |
| pET28a-PSPPH_3643-F | AGCAAATGGGTTCGCGGATCCATGTTTGAAGCTTTGGCG       |
| pET28a-PSPPH_3643-R | CGGAGCTCGAATTCGGATCCTTACACCGCAATCGACG         |
| pET28a-PSPPH_0031-F | AGCAAATGGGTTCGCGGATCCATGCAAATATCTGATATAGAGGTG |
| pET28a-PSPPH_0031-R | CGGAGCTCGAATTCGGATCCTTACAAGGTGACTCCCGC        |
| pET28a-PSPPH_2295-F | AGCAAATGGGTTCGCGGATCCATGACGCTTACGTCAAC        |
| pET28a-PSPPH_2295-R | CGGAGCTCGAATTCGGATCCTTAGTCAGTTTGCGCATT        |
| pET28a-PSPPH_0218-F | AGCAAATGGGTTCGCGGATCCATGACCAATCTTTTGCTCTATC   |
| pET28a-PSPPH_0218-R | CGGAGCTCGAATTCGGATCCTTAGTACACATGTACCGC        |
| pET28a-PSPPH_1969-F | AGCAAATGGGTTCGCGGATCCATGAAACGCTACGAAAATTCG    |
| pET28a-PSPPH_1969-R | CGGAGCTCGAATTCGGATCCTTAGAACGACGCGATGAT        |
| pET28a-PSPPH_2983-F | AGCAAATGGGTTCGCGGATCCATGAAAAACAACATGGATTTGCT  |
| pET28a-PSPPH_2983-R | CGGAGCTCGAATTCGGATCCTTAGGGCAGACGCGC           |
| pET28a-PSPPH_2315-F | AGCAAATGGGTTCGCGGATCCATGCCCATCGCCCT           |
| pET28a-PSPPH_2315-R | CGGAGCTCGAATTCGGATCCTTACTCGGACCAGGCCT         |
| pET28a-PSPPH_5138-F | AGCAAATGGGTTCGCGGATCCATGAACCTGCGTGTACCT       |
| pET28a-PSPPH_5138-R | CGGAGCTCGAATTCGGATCCTTACCGATGGTGAGTGTC        |
| pET28a-PSPPH_4822-F | AGCAAATGGGTTCGCGGATCCATGTACTCCATGAGCACA       |
| pET28a-PSPPH_4822-R | CGGAGCTCGAATTCGGATCCTCATTGCGCCGGACCAG         |
| pET28a-lexA1-F      | AGCAAATGGGTTCGCGGATCCATGATCAAACGACGCCA        |
| pET28a-lexA1-R      | CGGAGCTCGAATTCGGATCCTTAGCGGCGAATGACGCC        |
| pET28a-lexA2-F      | AGCAAATGGGTTCGCGGATCCATGAAACCGATGTCAGAAG      |
| pET28a-lexA2-R      | CGGAGCTCGAATTCGGATCCTCAACTCAACCGCGTCAG        |
| pET28a-PSPPH_3936-F | AGCAAATGGGTTCGCGGATCCATGAACCTGCCTCCCCGC       |
| pET28a-PSPPH_3936-R | CGGAGCTCGAATTCGGATCCTCACACTACTTCCAGACG        |
| pET28a-glpR-F       | AGCAAATGGGTTCGCGGATCCATGTGGAAGCGCAATACA       |
| pET28a-glpR-R       | CGGAGCTCGAATTCGGATCCTTAGCTGACAGCAGCACA        |
| pET28a-PSPPH_5204-F | AGCAAATGGGTTCGCGGATCCATGATCCCCGATCAGCGC       |
| pET28a-PSPPH_5204-R | CGGAGCTCGAATTCGGATCCTTAGCGCTTGCCACCCAC        |
| pET28a-PSPPH_4844-F | AGCAAATGGGTTCGCGGATCCATGTCCCTCTTGCTTGCG       |
| pET28a-PSPPH_4844-R | CGGAGCTCGAATTCGGATCCTCAGGGATAGAGGGTGTG        |
| pET28a-PSPPH_2188-F | AGCAAATGGGTTCGCGGATCCATGAAAGTCGCCAACCGT       |
| pET28a-PSPPH_2188-R | CGGAGCTCGAATTCGGATCCTCAGCCGGGCAGGGCAAT        |

|                        |                                            |
|------------------------|--------------------------------------------|
| pET28a- <i>srl</i> -F  | AGCAAATGGGTCGCGGATCCATGCGATGGTATGATGCC     |
| pET28a- <i>srl</i> -R  | CGGAGCTCGAATTCGGATCCTCAACCGCCACCCAGCAC     |
| pET28a-PSPPH_3577-F    | AGCAAATGGGTCGCGGATCCATGTGCGACTCCGCCCGCC    |
| pET28a-PSPPH_3577-R    | CGGAGCTCGAATTCGGATCCTCATTTGGTAAAGCGTCC     |
| pET28a- <i>hutC</i> -F | AGCAAATGGGTCGCGGATCCATGGGCGACTTCCACTAT     |
| pET28a- <i>hutC</i> -R | CGGAGCTCGAATTCGGATCCTTACGCCTTCTTGTTGCG     |
| pET28a- <i>fur</i> -F  | AGCAAATGGGTCGCGGATCCATGCTTGTGCGACCCACTG    |
| pET28a- <i>fur</i> -R  | CGGAGCTCGAATTCGGATCCTCAAACCTGCCCCCGTG      |
| pET28a-PSPPH_3297-F    | AGCAAATGGGTCGCGGATCCATGCCTGTGACATACAA      |
| pET28a-PSPPH_3297-R    | CGGAGCTCGAATTCGGATCCTTACCTGTCTGGATAACG     |
| pET28a-PSPPH_1136-F    | AGCAAATGGGTCGCGGATCCATGGTGTATGCCCCACACCTCA |
| pET28a-PSPPH_1136-R    | CGGAGCTCGAATTCGGATCCTCAGCTGGAAGGCGAAAC     |
| pET28a-PSPPH_0286-F    | AGCAAATGGGTCGCGGATCCATGCCCAATACTCCCCTG     |
| pET28a-PSPPH_0286-R    | CGGAGCTCGAATTCGGATCCTCAAGCCGCCTTGCAGCC     |
| pET28a-PSPPH_0263-F    | AGCAAATGGGTCGCGGATCCATGCCTATCGACCTCGA      |
| pET28a-PSPPH_0263-R    | CGGAGCTCGAATTCGGATCCTTAGGTGCGGTTGTTCA      |
| pET28a-PSPPH_4056-F    | AGCAAATGGGTCGCGGATCCATGCAAGAGCCTGTGCG      |
| pET28a-PSPPH_4056-R    | CGGAGCTCGAATTCGGATCCTTACTCCAGCGGCACC       |
| pET28a-PSPPH_3031-F    | AGCAAATGGGTCGCGGATCCATGCGACTGACTACTAAAGG   |
| pET28a-PSPPH_3031-R    | CGGAGCTCGAATTCGGATCCTTATTCGACGGCGGA        |
| pET28a- <i>iscR</i> -F | AGCAAATGGGTCGCGGATCCATGAACGACCAGTCCCTG     |
| pET28a- <i>iscR</i> -R | CGGAGCTCGAATTCGGATCCTTAACGCCCGGTCTTTTTTC   |
| pET28a-PSPPH_1771-F    | AGCAAATGGGTCGCGGATCCATGGGGATCGCAGCCTA      |
| pET28a-PSPPH_1771-R    | CGGAGCTCGAATTCGGATCCTTAGTCGCTGTACAGCG      |
| pET28a-PSPPH_3004-F    | AGCAAATGGGTCGCGGATCCATGAACGACGCTGCTT       |
| pET28a-PSPPH_3004-R    | CGGAGCTCGAATTCGGATCCTTAGCGGCCCGG           |
| pET28a-PSPPH_0486-F    | AGCAAATGGGTCGCGGATCCATGCTGGGTGCGGTC        |
| pET28a-PSPPH_0486-R    | CGGAGCTCGAATTCGGATCCTTATTCACCTCGGTGCGGA    |
| pET28a-PSPPH_2055-F    | AGCAAATGGGTCGCGGATCCATGGATGTTGAAGCCGCA     |
| pET28a-PSPPH_2055-R    | CGGAGCTCGAATTCGGATCCTTACACCCCAAACACCTTC    |
| pET28a-PSPPH_1734-F    | AGCAAATGGGTCGCGGATCCATGACGTTCAAGGCC        |
| pET28a-PSPPH_1734-R    | CGGAGCTCGAATTCGGATCCTTAGTCCGCTGCCAG        |
| pET28a-PSPPH_1776-F    | AGCAAATGGGTCGCGGATCCATGAGTACGGTTATACTCAGC  |
| pET28a-PSPPH_1776-R    | CGGAGCTCGAATTCGGATCCTTAATCCTTTGCGCGCA      |
| pET28a-PSPPH_3005-F    | AGCAAATGGGTCGCGGATCCATGGAATACGGACCTTGCATGC |
| pET28a-PSPPH_3005-R    | CGGAGCTCGAATTCGGATCCTTAGGCCGCCCGCCG        |
| pET28a-PSPPH_4637-F    | AGCAAATGGGTCGCGGATCCATGACTCGAACTGCCAG      |
| pET28a-PSPPH_4637-R    | CGGAGCTCGAATTCGGATCCTTAGCGCGGTTTGAAAAT     |
| pET28a-PSPPH_3471-F    | AGCAAATGGGTCGCGGATCCATGCGTGAAGATAAACACCCT  |
| pET28a-PSPPH_3471-R    | CGGAGCTCGAATTCGGATCCTTATGCCGACTCCTCCG      |
| pET28a-PSPPH_3923-F    | AGCAAATGGGTCGCGGATCCATGCGCAAATCAGATAGAGA   |
| pET28a-PSPPH_3923-R    | CGGAGCTCGAATTCGGATCCTTAGGCGGGGGTTTTCT      |
| pET28a-PSPPH_5087-F    | AGCAAATGGGTCGCGGATCCATGAGTGAATCTGCCTCG     |
| pET28a-PSPPH_5087-R    | CGGAGCTCGAATTCGGATCCTTATTCGGGCGTGATCT      |
| pET28a-PSPPH_2859-F    | AGCAAATGGGTCGCGGATCCATGCCATTGACTGATGAACA   |
| pET28a-PSPPH_2859-R    | CGGAGCTCGAATTCGGATCCTTAGGATCTTCCAGATTGG    |

|                        |                                            |
|------------------------|--------------------------------------------|
| pET28a-PSPPH_1519-F    | AGCAAATGGGTCGCGGATCCATGCTTGACTTAAAAAACCT   |
| pET28a-PSPPH_1519-R    | CGGAGCTCGAATTCGGATCCTTACTCGACGTCAGTCC      |
| pET28a-PSPPH_1800-F    | AGCAAATGGGTCGCGGATCCATGTCGTCAGCCGAAC       |
| pET28a-PSPPH_1800-R    | CGGAGCTCGAATTCGGATCCTTAGCTTTTACTGCCACTT    |
| pET28a-PSPPH_1617-F    | AGCAAATGGGTCGCGGATCCATGCAGTTGTCTAGACAAGC   |
| pET28a-PSPPH_1617-R    | CGGAGCTCGAATTCGGATCCTTAGTCAGTCGTTGGGGT     |
| pET28a- <i>phnF</i> -F | AGCAAATGGGTCGCGGATCCATGAGCAAACCCGGGC       |
| pET28a- <i>phnF</i> -R | CGGAGCTCGAATTCGGATCCTTAGTTCGAGCGCTGGAT     |
| pET28a- <i>vanR</i> -F | AGCAAATGGGTCGCGGATCCATGGCCAAACAGCAATTATTG  |
| pET28a- <i>vanR</i> -R | CGGAGCTCGAATTCGGATCCTTAACTCCAGCGCTTGA      |
| pET28a-PSPPH_5194-F    | AGCAAATGGGTCGCGGATCCATGCAGACAGCATGTGC      |
| pET28a-PSPPH_5194-R    | CGGAGCTCGAATTCGGATCCTTATTGTGTTTGCACACG     |
| pET28a-PSPPH_2720-F    | AGCAAATGGGTCGCGGATCCATGATTCTTGAGCAAATCAAAG |
| pET28a-PSPPH_2720-R    | CGGAGCTCGAATTCGGATCCTTATAGTTCTTTCTTGAGCCG  |
| pET28a-PSPPH_1222-F    | AGCAAATGGGTCGCGGATCCATGCGCGACGATGTG        |
| pET28a-PSPPH_1222-R    | CGGAGCTCGAATTCGGATCCTTACAACCTGCCACGCA      |
| pET28a-PSPPH_1595-F    | AGCAAATGGGTCGCGGATCCATGCAAACAGAGTGCA       |
| pET28a-PSPPH_1595-R    | CGGAGCTCGAATTCGGATCCTTACGCTGCCGCTGA        |
| pET28a-PSPPH_2423-F    | AGCAAATGGGTCGCGGATCCATGAGTGCCGAAGAAAAC     |
| pET28a-PSPPH_2423-R    | CGGAGCTCGAATTCGGATCCTTAAAGGCTCTGGTGCAG     |
| pET28a- <i>mgrA</i> -F | AGCAAATGGGTCGCGGATCCATGAAACATTTAGCCCCG     |
| pET28a- <i>mgrA</i> -R | CGGAGCTCGAATTCGGATCCTTAGCTTTTAGCTTTGGGGT   |
| pET28a- <i>marR</i> -F | AGCAAATGGGTCGCGGATCCATGGAAAATCAAAGCGCTC    |
| pET28a- <i>marR</i> -R | CGGAGCTCGAATTCGGATCCTTAGACCCGCTGCGA        |
| pET28a-PSPPH_4253-F    | AGCAAATGGGTCGCGGATCCATGAATTCCCCCAACACC     |
| pET28a-PSPPH_4253-R    | CGGAGCTCGAATTCGGATCCTTATGCTTCATGCCGC       |
| pET28a-PSPPH_1233-F    | AGCAAATGGGTCGCGGATCCATGGTTGCAGGCACC        |
| pET28a-PSPPH_1233-R    | CGGAGCTCGAATTCGGATCCTTAGCGCCCTATGCG        |
| pET28a-PSPPH_2563-F    | AGCAAATGGGTCGCGGATCCATGACGCCAACGGC         |
| pET28a-PSPPH_2563-R    | CGGAGCTCGAATTCGGATCCTTAGCGAATTTCCACGCT     |
| pET28a-PSPPH_3048-F    | AGCAAATGGGTCGCGGATCCATGGCCAGAAGTCATCGT     |
| pET28a-PSPPH_3048-R    | CGGAGCTCGAATTCGGATCCTTAGCAGGTCTCGCC        |
| pET28a-PSPPH_1456-F    | AGCAAATGGGTCGCGGATCCATGGCCAAGCCATCCG       |
| pET28a-PSPPH_1456-R    | CGGAGCTCGAATTCGGATCCTTACGATTGGTAGACCTTTTC  |
| pET28a-PSPPH_2432-F    | AGCAAATGGGTCGCGGATCCATGGTTATCGAAGAATCAGGGA |
| pET28a-PSPPH_2432-R    | CGGAGCTCGAATTCGGATCCTTAGGGATGAGCCTTGAT     |
| pET28a-PSPPH_2204-F    | AGCAAATGGGTCGCGGATCCATGGCTGCAGGAATCCAC     |
| pET28a-PSPPH_2204-R    | CGGAGCTCGAATTCGGATCCTTAGGGTGAGAGCGTCA      |
| pET28a-PSPPH_0755-F    | AGCAAATGGGTCGCGGATCCATGTGCAGGGCGCAC        |
| pET28a-PSPPH_0755-R    | CGGAGCTCGAATTCGGATCCTTAGGCAGTACGCGG        |
| pET28a-PSPPH_1049-F    | AGCAAATGGGTCGCGGATCCATGTGCAGGGCGCAC        |
| pET28a-PSPPH_1049-R    | CGGAGCTCGAATTCGGATCCTTAGGCAGTACGCGG        |
| pET28a-PSPPH_2106-F    | AGCAAATGGGTCGCGGATCCATGACCCTTGAAGTCCCCG    |
| pET28a-PSPPH_2106-R    | CGGAGCTCGAATTCGGATCCTTACAAGGCTGGCGGC       |
| pET28a-PSPPH_4622-F    | AGCAAATGGGTCGCGGATCCATGACTCAATTGCCGGTAA    |
| pET28a-PSPPH_4622-R    | CGGAGCTCGAATTCGGATCCTTATTGCGGCAAACCAC      |

|                     |                                            |
|---------------------|--------------------------------------------|
| pET28a-PSPPH_2407-F | AGCAAATGGGTGCGGGATCCATGTCTGCATGGTCCG       |
| pET28a-PSPPH_2407-R | CGGAGCTCGAATTCGGATCCTTAGCGCCCTGTCAG        |
| pET28a-PSPPH_1730-F | AGCAAATGGGTGCGGGATCCATGAGCAGTATCCGCGAG     |
| pET28a-PSPPH_1730-R | CGGAGCTCGAATTCGGATCCTTAGCGGTCCGGCT         |
| pET28a-PSPPH_1728-F | AGCAAATGGGTGCGGGATCCATGGTTCGTCGCACCAAAG    |
| pET28a-PSPPH_1728-R | CGGAGCTCGAATTCGGATCCTTAGGAAGCCTTGCTGATT    |
| pET28a-PSPPH_4012-F | AGCAAATGGGTGCGGGATCCATGACCATCAACGCACGA     |
| pET28a-PSPPH_4012-R | CGGAGCTCGAATTCGGATCCTTAAGCCGGCAGCGG        |
| pET28a-PSPPH_3487-F | AGCAAATGGGTGCGGGATCCATGACCGCACCCATGC       |
| pET28a-PSPPH_3487-R | CGGAGCTCGAATTCGGATCCTTAGGGAGTCACTTCGTA     |
| pET28a-PSPPH_2448-F | AGCAAATGGGTGCGGGATCCATGAGAGTCACCAAGGC      |
| pET28a-PSPPH_2448-R | CGGAGCTCGAATTCGGATCCTTAAAGAGCCTGCAGTTG     |
| pET28a-PSPPH_3066-F | AGCAAATGGGTGCGGGATCCATGACTCTGCATGACCCCA    |
| pET28a-PSPPH_3066-R | CGGAGCTCGAATTCGGATCCTTAGGGACGAGCCCTTA      |
| pET28a-PSPPH_3654-F | AGCAAATGGGTGCGGGATCCATGCGTTACGCGCTC        |
| pET28a-PSPPH_3654-R | CGGAGCTCGAATTCGGATCCTTAGTTGGCGCTCTTC       |
| pET28a-PSPPH_2305-F | AGCAAATGGGTGCGGGATCCATGGCACAGATGGGACG      |
| pET28a-PSPPH_2305-R | CGGAGCTCGAATTCGGATCCTTATTGGTCGTCGGCAA      |
| pET28a-PSPPH_2893-F | AGCAAATGGGTGCGGGATCCATGAGCCTCAATCATTATTGC  |
| pET28a-PSPPH_2893-R | CGGAGCTCGAATTCGGATCCTTATGATTTCTGACCTGCAGG  |
| pET28a-PSPPH_1097-F | AGCAAATGGGTGCGGGATCCATGCCCGCCATTGAATC      |
| pET28a-PSPPH_1097-R | CGGAGCTCGAATTCGGATCCTTATTGGCCTAACGCCAG     |
| pET28a-PSPPH_3122-F | AGCAAATGGGTGCGGGATCCATGATCGTCCTGAACTCGA    |
| pET28a-PSPPH_3122-R | CGGAGCTCGAATTCGGATCCTTACCCGTCGACGCTTTTC    |
| pET28a-PSPPH_3486-F | AGCAAATGGGTGCGGGATCCATGTTTCTAAGCCTTGAAGTTC |
| pET28a-PSPPH_3486-R | CGGAGCTCGAATTCGGATCCTTACCCGGACTGTTTTTGC    |
| pET28a-PSPPH_2597-F | AGCAAATGGGTGCGGGATCCATGAGTAAACAACAAGAATCGC |
| pET28a-PSPPH_2597-R | CGGAGCTCGAATTCGGATCCTTAGTACAGTTTTTGTTCGG   |
| pET28a-PSPPH_1962-F | AGCAAATGGGTGCGGGATCCATGACGTTACCTGTTGTTATTG |
| pET28a-PSPPH_1962-R | CGGAGCTCGAATTCGGATCCTTAAACCCTACAGCCCTCTT   |
| pET28a-PSPPH_3027-F | AGCAAATGGGTGCGGGATCCATGCTGCGCATGGC         |
| pET28a-PSPPH_3027-R | CGGAGCTCGAATTCGGATCCTTAGTCGTGACGAGTGATC    |
| pET28a-PSPPH_2994-F | AGCAAATGGGTGCGGGATCCATGACTCTCAAAGTGACTG    |
| pET28a-PSPPH_2994-R | CGGAGCTCGAATTCGGATCCTTAGTCGAAATTGAACAGG    |
| pET28a-PSPPH_2214-F | AGCAAATGGGTGCGGGATCCATGGCTATCAAAGAAGCAG    |
| pET28a-PSPPH_2214-R | CGGAGCTCGAATTCGGATCCTTAGCTCAGGCAGCG        |
| pET28a-PSPPH_4495-F | AGCAAATGGGTGCGGGATCCATGCTGCCCGCG           |
| pET28a-PSPPH_4495-R | CGGAGCTCGAATTCGGATCCTTAATCGTGACTGCCGA      |
| pET28a-PSPPH_3202-F | AGCAAATGGGTGCGGGATCCATGGCCAGTCGGAAAC       |
| pET28a-PSPPH_3202-R | CGGAGCTCGAATTCGGATCCTTAGGCCTTGCTACCG       |
| pET28a-PSPPH_2733-F | AGCAAATGGGTGCGGGATCCATGGCCAGGCTGAAAAC      |
| pET28a-PSPPH_2733-R | CGGAGCTCGAATTCGGATCCTTATTTGTCAGGTGCAGG     |
| pET28a-PSPPH_1670-F | AGCAAATGGGTGCGGGATCCATGCCGACCTTGACCC       |
| pET28a-PSPPH_1670-R | CGGAGCTCGAATTCGGATCCTTATGCGCTTTGGCG        |
| pET28a-PSPPH_3479-F | AGCAAATGGGTGCGGGATCCATGTGACCTCAGATACC      |
| pET28a-PSPPH_3479-R | CGGAGCTCGAATTCGGATCCTTATGGTGTAAGCAAAAAGA   |

|                         |                                           |
|-------------------------|-------------------------------------------|
| pET28a-PSPPH_4788-F     | AGCAAATGGGTCGCGGATCCATGGCAACCCGTACCAA     |
| pET28a-PSPPH_4788-R     | CGGAGCTCGAATTCGGATCCTTACATCAGAACCTCAGG    |
| pET28a-PSPPH_4320-F     | AGCAAATGGGTCGCGGATCCATGAGCGCTCTGGACAT     |
| pET28a-PSPPH_4320-R     | CGGAGCTCGAATTCGGATCCTTAATTTTCTGTGCGGTTTC  |
| pET28a-PSPPH_0376-F     | AGCAAATGGGTCGCGGATCCATGAAAACCCGCGACC      |
| pET28a-PSPPH_0376-R     | CGGAGCTCGAATTCGGATCCTTACCTACCCAGATACTCCAT |
| pET28a-PSPPH_0735-F     | AGCAAATGGGTCGCGGATCCATGAGGAACGATAAGTGTCT  |
| pET28a-PSPPH_0735-R     | CGGAGCTCGAATTCGGATCCTTAAGGCGACAGACTGC     |
| pET28a-PSPPH_3268-F     | AGCAAATGGGTCGCGGATCCATGAAGGTGCGTACTGAAG   |
| pET28a-PSPPH_3268-R     | CGGAGCTCGAATTCGGATCCTCAGCGCTTTTCCATGCC    |
| pET28a-PSPPH_4899-F     | AGCAAATGGGTCGCGGATCCATGACACGCGCCGCCACG    |
| pET28a-PSPPH_4899-R     | CGGAGCTCGAATTCGGATCCTTAAATAACTCGCTTCAC    |
| pET28a-PSPPH_4448-F     | AGCAAATGGGTCGCGGATCCATGACGATGATGACCGAG    |
| pET28a-PSPPH_4448-R     | CGGAGCTCGAATTCGGATCCTTAAAGCAGATCGTACTG    |
| pET28a-PSPPH_1651-F     | AGCAAATGGGTCGCGGATCCATGCAGAAAGAACCTCGT    |
| pET28a-PSPPH_1651-R     | CGGAGCTCGAATTCGGATCCTTATTCCGTAGCAGGGTC    |
| pET28a-PSPPH_2984-F     | AGCAAATGGGTCGCGGATCCTTGCCACTGCCTCAACTG    |
| pET28a-PSPPH_2984-R     | CGGAGCTCGAATTCGGATCCTTATCCGCTCGCATCGGA    |
| pET28a-PSPPH_3872-F     | AGCAAATGGGTCGCGGATCCGTGACGATTGCCAGAGAAG   |
| pET28a-PSPPH_3872-R     | CGGAGCTCGAATTCGGATCCTCACCCCTGAACCGGCTG    |
| pET28a-PSPPH_2774-F     | AGCAAATGGGTCGCGGATCCATGAAGCTCATTGCTGAC    |
| pET28a-PSPPH_2774-R     | CGGAGCTCGAATTCGGATCCTCAGGAGGTTGACAGGCC    |
| pET28a-PSPPH_3983-F     | AGCAAATGGGTCGCGGATCCATGAACGTGGCCACTCCCT   |
| pET28a-PSPPH_3983-R     | CGGAGCTCGAATTCGGATCCCTATCCCAACTCTACTCC    |
| pET28a-PSPPH_2905-F     | AGCAAATGGGTCGCGGATCCTTGAAGACGTACCCGATG    |
| pET28a-PSPPH_2905-R     | CGGAGCTCGAATTCGGATCCTCACTTGCCAGTCGTCCG    |
| pET28a- <i>betI</i> -F  | AGCAAATGGGTCGCGGATCCATGCCCAAGGTCGGAATG    |
| pET28a- <i>betI</i> -R  | CGGAGCTCGAATTCGGATCCTCAGCTCGCCGATTTCCG    |
| pET28a-PSPPH_0102-F     | AGCAAATGGGTCGCGGATCCATGTCTAGTCGACGATAT    |
| pET28a-PSPPH_0102-R     | CGGAGCTCGAATTCGGATCCTTATTGATCGGGAGTGGG    |
| pET28a-PSPPH_0101-F     | AGCAAATGGGTCGCGGATCCATGACCGGCCCATCAACT    |
| pET28a-PSPPH_0101-R     | CGGAGCTCGAATTCGGATCCTTACAAACCTCCTCCATT    |
| pET28a-PSPPH_4920-F     | AGCAAATGGGTCGCGGATCCATGTATCAATATCCATTG    |
| pET28a-PSPPH_4920-R     | CGGAGCTCGAATTCGGATCCTCAAGCGGCCCGCTCAAT    |
| pET28a-PSPPH_3182-F     | AGCAAATGGGTCGCGGATCCATGACAAAGGAAAAGTTG    |
| pET28a-PSPPH_3182-R     | CGGAGCTCGAATTCGGATCCTCAGGCCTGGCGCTGGTG    |
| pET28a- <i>dksA2</i> -F | AGCAAATGGGTCGCGGATCCATGCCACCCAGAAAAG      |
| pET28a- <i>dksA2</i> -R | CGGAGCTCGAATTCGGATCCTCACTTACCGACCTGTTTTTC |
| pET28a-PSPPH_5139-F     | AGCAAATGGGTCGCGGATCCATGAAAATTATAAAAAATG   |
| pET28a-PSPPH_5139-R     | CGGAGCTCGAATTCGGATCCTCAAACGTTCTCCCTGC     |
| pET28a-PSPPH_4336-F     | AGCAAATGGGTCGCGGATCCATGATTCTCTGCCTGAAG    |
| pET28a-PSPPH_4336-R     | CGGAGCTCGAATTCGGATCCTCAGAACACCCCGCTCAG    |
| pET28a- <i>sfsA</i> -F  | AGCAAATGGGTCGCGGATCCATGCGTTTTGCTCCGCAG    |
| pET28a- <i>sfsA</i> -R  | CGGAGCTCGAATTCGGATCCTCAATCCAGCCAGTGCAC    |
| pET28a- <i>algQ</i> -F  | AGCAAATGGGTCGCGGATCCATGCTGGAAAGTTGTCAG    |
| pET28a- <i>algQ</i> -R  | CGGAGCTCGAATTCGGATCCTCACACCTGCGCGCGGAT    |

**Supplementary Table 1b: Strains, plasmids and primers used in this study, related to Fig. 1a, Fig. 2c-2e, Supplementary Fig.2b-2F, Supplementary Fig. 3**

| Strains                                       | Description                                                                                                        | Reference or Application |
|-----------------------------------------------|--------------------------------------------------------------------------------------------------------------------|--------------------------|
| <b><i>E. coli</i> Strains</b>                 |                                                                                                                    |                          |
| <i>E. coli</i> DH5 $\alpha$                   | supE44<br>$\Delta$ lacU169( $\phi$ 80lacZ $\Delta$ M15) <i>hsdR17recA1 endA1 gyrA96thi-1 relA1</i> $\lambda$ pir   | Stratagene               |
| <i>E. coli</i> BL21(DE3)                      | F <sup>-</sup> <i>ompT hsdS<sub>B</sub> (r<sub>B</sub><sup>-</sup>m<sub>B</sub><sup>-</sup>) gal dcm met</i> (DE3) | Invitrogen               |
| <b><i>P. syringae</i> strains</b>             |                                                                                                                    |                          |
| <i>P. syringae</i> 1448A                      | Wild type                                                                                                          | Lab stock                |
| <i>P. syringae</i> 1448A $\Delta$ <i>metR</i> | Clean deletion of <i>metR</i>                                                                                      | This study               |
| <i>P. syringae</i> 1448A $\Delta$ PSPPH_3297  | Clean deletion of PSPPH_3297                                                                                       | This study               |
| <i>P. syringae</i> 1448A $\Delta$ <i>pcaQ</i> | Clean deletion of <i>pcaQ</i>                                                                                      | This study               |
| <i>P. syringae</i> 1448A $\Delta$ <i>rbsR</i> | Clean deletion of <i>rbsR</i>                                                                                      | This study               |

| Plasmids            | Description                                                                              | Source or reference         |
|---------------------|------------------------------------------------------------------------------------------|-----------------------------|
| pMS402              | Expression reporter plasmid carrying the promoterless <i>luxCDABE</i> ; Kan <sup>r</sup> | Duan et al., 2003           |
| pMS402-2621         | <i>lux</i> -reporter fused with the promoter of PSPPH_2621; Kan <sup>r</sup>             | This study                  |
| pMS402-3297         | <i>lux</i> -reporter fused with the promoter of PSPPH_3297; Kan <sup>r</sup>             | This study                  |
| <b>pK18 mobsacB</b> | a pK18 suicide plasmid, used to mutant gene in <i>P. syringae</i> 1448A                  | Kvitko <i>et al.</i> , 2011 |
| pK18- <i>metR</i>   | This plasmid was used to mutate <i>metR</i> in <i>P. syringae</i> 1448A                  | This study                  |
| pK18-PSPPH_3297     | This plasmid was used to mutate PSPPH_3297 in <i>P. syringae</i> 1448A                   | This study                  |
| pK18- <i>pcaQ</i>   | This plasmid was used to mutate <i>pcaQ</i> in <i>P. syringae</i> 1448A                  | This study                  |
| pK18- <i>rbsR</i>   | This plasmid was used to mutate <i>rbsR</i> in <i>P. syringae</i> 1448A                  | This study                  |
| <b>pET28a</b>       | N-terminus His-tag fusion expression plasmid. Ori:f1. T7 promoter. Kan <sup>r</sup>      | Invitrogen                  |
| pET28a-PSPPH_4238   | pET28a containing ORF of PSPPH_4238 from <i>P. syringae</i> 1448A                        | This study                  |
| pET28a-PSPPH_1818   | pET28a containing ORF of PSPPH_1818 from <i>P. syringae</i> 1448A                        | This study                  |
| pET28a-PSPPH_1615   | pET28a containing ORF of PSPPH_1615 from <i>P. syringae</i> 1448A                        | This study                  |
| pET28a-PSPPH_3285   | pET28a containing ORF of PSPPH_3285 from <i>P. syringae</i> 1448A                        | This study                  |
| pET28a-PSPPH_3530   | pET28a containing ORF of PSPPH_3530 from <i>P. syringae</i> 1448A                        | This study                  |
| pET28a-PSPPH_0082   | pET28a containing ORF of PSPPH_0082 from <i>P. syringae</i> 1448A                        | This study                  |



|                     |                                                                                                     |                           |
|---------------------|-----------------------------------------------------------------------------------------------------|---------------------------|
| pET28a-PSPPH_2337   | pET28a containing ORF of PSPPH_2337 from <i>P. syringae</i> 1448A                                   | This study                |
| pET28a-PSPPH_1169   | pET28a containing ORF of PSPPH_1169 from <i>P. syringae</i> 1448A                                   | This study                |
| pET28a-PSPPH_2872   | pET28a containing ORF of PSPPH_2872 from <i>P. syringae</i> 1448A                                   | This study                |
| pET28a-PSPPH_2357   | pET28a containing ORF of PSPPH_2357 from <i>P. syringae</i> 1448A                                   | This study                |
| pET28a-PSPPH_0406   | pET28a containing ORF of PSPPH_0406 from <i>P. syringae</i> 1448A                                   | This study                |
| pET28a-PSPPH_5145   | pET28a containing ORF of PSPPH_5145 from <i>P. syringae</i> 1448A                                   | This study                |
| pET28a- <i>hexR</i> | pET28a containing ORF of <i>hexR</i> from <i>P. syringae</i> 1448A                                  | This study                |
| pET28a-PSPPH_3195   | pET28a containing ORF of PSPPH_3195 from <i>P. syringae</i> 1448A                                   | This study                |
| pET28a-PSPPH_1680   | pET28a containing ORF of PSPPH_1680 from <i>P. syringae</i> 1448A                                   | This study                |
| pET28a- <i>hrpR</i> | pET28a containing ORF of <i>hrpR</i> truncation (from 241 to 306 aa) from <i>P. syringae</i> 1448A  | Wang <i>et al.</i> , 2018 |
| pET28a-PSPPH_2426   | pET28a containing ORF of PSPPH_2426 from <i>P. syringae</i> 1448A                                   | This study                |
| pET28a-PSPPH_3168   | pET28a containing ORF of PSPPH_3168 from <i>P. syringae</i> 1448A                                   | This study                |
| pET28a-PSPPH_2229   | pET28a containing ORF of PSPPH_2229 from <i>P. syringae</i> 1448A                                   | This study                |
| pET28a- <i>hrpS</i> | pET28a containing ORF of <i>hrpS</i> truncation (from 235 to 303 aa ) from <i>P. syringae</i> 1448A | Wang <i>et al.</i> , 2018 |
| pET28a-PSPPH_3522   | pET28a containing ORF of PSPPH_3522 from <i>P. syringae</i> 1448A                                   | This study                |
| pET28a-PSPPH_4744   | pET28a containing ORF of PSPPH_4744 from <i>P. syringae</i> 1448A                                   | This study                |
| pET28a-PSPPH_4127   | pET28a containing ORF of PSPPH_4127 from <i>P. syringae</i> 1448A                                   | This study                |
| pET28a- <i>fttA</i> | pET28a containing ORF of <i>fttA</i> from <i>P. syringae</i> 1448A                                  | This study                |
| pET28a- <i>ntrC</i> | pET28a containing ORF of <i>ntrC</i> from <i>P. syringae</i> 1448A                                  | This study                |
| pET28a- <i>fleQ</i> | pET28a containing ORF of <i>fleQ</i> from <i>P. syringae</i> 1448A                                  | This study                |
| pET28a- <i>algB</i> | pET28a containing ORF of <i>algB</i> from <i>P. syringae</i> 1448A                                  | This study                |
| pET28a- <i>tsiR</i> | pET28a containing ORF of <i>tsiR</i> from <i>P. syringae</i> 1448A                                  | This study                |
| pET28a-PSPPH_0146   | pET28a containing ORF of PSPPH_0146 from <i>P. syringae</i> 1448A                                   | This study                |
| pET28a- <i>pilR</i> | pET28a containing ORF of <i>pilR</i> from <i>P. syringae</i> 1448A                                  | This study                |
| pET28a- <i>fleR</i> | pET28a containing ORF of <i>fleR</i> from <i>P. syringae</i> 1448A                                  | This study                |
| pET28a-PSPPH_3907   | pET28a containing ORF of PSPPH_3907 from <i>P. syringae</i> 1448A                                   | This study                |
| pET28a-PSPPH_4002   | pET28a containing ORF of PSPPH_4002 from <i>P. syringae</i> 1448A                                   | This study                |

|                      |                                                                     |                          |
|----------------------|---------------------------------------------------------------------|--------------------------|
| pET28a-PSPPH_5171    | pET28a containing ORF of PSPPH_5171 from <i>P. syringae</i> 1448A   | This study               |
| pET28a-PSPPH_3800    | pET28a containing ORF of PSPPH_3800 from <i>P. syringae</i> 1448A   | This study               |
| pET28a-PSPPH_4241    | pET28a containing ORF of PSPPH_4241 from <i>P. syringae</i> 1448A   | This study               |
| pET28a-PSPPH_0642    | pET28a containing ORF of PSPPH_0642 from <i>P. syringae</i> 1448A   | This study               |
| pET28a-PSPPH_3220    | pET28a containing ORF of PSPPH_3220 from <i>P. syringae</i> 1448A   | This study               |
| pET28a-PSPPH_1364    | pET28a containing ORF of PSPPH_1364 from <i>P. syringae</i> 1448A   | This study               |
| pET28a-PSPPH_1374    | pET28a containing ORF of PSPPH_1374 from <i>P. syringae</i> 1448A   | This study               |
| pET28a- <i>gacA</i>  | pET28a containing ORF of <i>gacA</i> from <i>P. syringae</i> 1448A  | This study               |
| pET28a- <i>cpxR</i>  | pET28a containing ORF of <i>cpxR</i> from <i>P. syringae</i> 1448A  | This study               |
| pET28a-PSPPH_0778    | pET28a containing ORF of PSPPH_0778 from <i>P. syringae</i> 1448A   | This study               |
| pET28a-PSPPH_1906    | pET28a containing ORF of PSPPH_1906 from <i>P. syringae</i> 1448A   | This study               |
| pET28a- <i>rhpR</i>  | pET28a containing ORF of <i>rhpR</i> from <i>P. syringae</i> 1448A  | Xie <i>et al.</i> , 2019 |
| pET28a-PSPPH_4419    | pET28a containing ORF of PSPPH_4419 from <i>P. syringae</i> 1448A   | This study               |
| pET28a- <i>kdpE</i>  | pET28a containing ORF of <i>kdpE</i> from <i>P. syringae</i> 1448A  | This study               |
| pET28a- <i>cvsR</i>  | pET28a containing ORF of <i>cvsR</i> from <i>P. syringae</i> 1448A  | This study               |
| pET28a- <i>colR</i>  | pET28a containing ORF of <i>colR</i> from <i>P. syringae</i> 1448A  | This study               |
| pET28a- <i>baeS1</i> | pET28a containing ORF of <i>baeS1</i> from <i>P. syringae</i> 1448A | This study               |
| pET28a- <i>algR</i>  | pET28a containing ORF of <i>algR</i> from <i>P. syringae</i> 1448A  | This study               |
| pET28a-PSPPH_3547    | pET28a containing ORF of PSPPH_3547 from <i>P. syringae</i> 1448A   | This study               |
| pET28a-PSPPH_3040    | pET28a containing ORF of PSPPH_3040 from <i>P. syringae</i> 1448A   | This study               |
| pET28a-PSPPH_1195    | pET28a containing ORF of PSPPH_1195 from <i>P. syringae</i> 1448A   | This study               |
| pET28a-PSPPH_3453    | pET28a containing ORF of PSPPH_3453 from <i>P. syringae</i> 1448A   | This study               |
| pET28a-PSPPH_4828    | pET28a containing ORF of PSPPH_4828 from <i>P. syringae</i> 1448A   | This study               |
| pET28a- <i>ompR</i>  | pET28a containing ORF of <i>ompR</i> from <i>P. syringae</i> 1448A  | This study               |
| pET28a- <i>tctD</i>  | pET28a containing ORF of <i>tctD</i> from <i>P. syringae</i> 1448A  | This study               |
| pET28a-PSPPH_3294    | pET28a containing ORF of PSPPH_3294 from <i>P. syringae</i> 1448A   | This study               |
| pET28a-PSPPH_2995    | pET28a containing ORF of PSPPH_2995 from <i>P. syringae</i> 1448A   | This study               |
| pET28a- <i>gltR</i>  | pET28a containing ORF of <i>gltR</i> from <i>P. syringae</i> 1448A  | This study               |

|                     |                                                                    |            |
|---------------------|--------------------------------------------------------------------|------------|
| pET28a- <i>phoB</i> | pET28a containing ORF of <i>phoB</i> from <i>P. syringae</i> 1448A | This study |
| pET28a- <i>phoP</i> | pET28a containing ORF of <i>phoP</i> from <i>P. syringae</i> 1448A | This study |
| pET28a- <i>rstA</i> | pET28a containing ORF of <i>rstA</i> from <i>P. syringae</i> 1448A | This study |
| pET28a-PSPPH_4255   | pET28a containing ORF of PSPPH_4255 from <i>P. syringae</i> 1448A  | This study |
| pET28a-PSPPH_4841   | pET28a containing ORF of PSPPH_4841 from <i>P. syringae</i> 1448A  | This study |
| pET28a-PSPPH_4692   | pET28a containing ORF of PSPPH_4692 from <i>P. syringae</i> 1448A  | This study |
| pET28a-PSPPH_2862   | pET28a containing ORF of PSPPH_2862 from <i>P. syringae</i> 1448A  | This study |
| pET28a-PSPPH_1580   | pET28a containing ORF of PSPPH_1580 from <i>P. syringae</i> 1448A  | This study |
| pET28a- <i>anr</i>  | pET28a containing ORF of <i>anr</i> from <i>P. syringae</i> 1448A  | This study |
| pET28a- <i>vfr</i>  | pET28a containing ORF of <i>vfr</i> from <i>P. syringae</i> 1448A  | This study |
| pET28a-PSPPH_4646   | pET28a containing ORF of PSPPH_4646 from <i>P. syringae</i> 1448A  | This study |
| pET28a- <i>pobR</i> | pET28a containing ORF of <i>pobR</i> from <i>P. syringae</i> 1448A | This study |
| pET28a-PSPPH_2917   | pET28a containing ORF of PSPPH_2917 from <i>P. syringae</i> 1448A  | This study |
| pET28a-PSPPH_3170   | pET28a containing ORF of PSPPH_3170 from <i>P. syringae</i> 1448A  | This study |
| pET28a-PSPPH_1160   | pET28a containing ORF of PSPPH_1160 from <i>P. syringae</i> 1448A  | This study |
| pET28a- <i>cspD</i> | pET28a containing ORF of <i>cspD</i> from <i>P. syringae</i> 1448A | This study |
| pET28a- <i>capB</i> | pET28a containing ORF of <i>capB</i> from <i>P. syringae</i> 1448A | This study |
| pET28a- <i>capA</i> | pET28a containing ORF of <i>capA</i> from <i>P. syringae</i> 1448A | This study |
| pET28a-PSPPH_3779   | pET28a containing ORF of PSPPH_3779 from <i>P. syringae</i> 1448A  | This study |
| pET28a-PSPPH_3504   | pET28a containing ORF of PSPPH_3504 from <i>P. syringae</i> 1448A  | This study |
| pET28a-PSPPH_2338   | pET28a containing ORF of PSPPH_2338 from <i>P. syringae</i> 1448A  | This study |
| pET28a- <i>gntR</i> | pET28a containing ORF of <i>gntR</i> from <i>P. syringae</i> 1448A | This study |
| pET28a- <i>rbsR</i> | pET28a containing ORF of <i>rbsR</i> from <i>P. syringae</i> 1448A | This study |
| pET28a- <i>fruR</i> | pET28a containing ORF of <i>fruR</i> from <i>P. syringae</i> 1448A | This study |
| pET28a-PSPPH_5193   | pET28a containing ORF of PSPPH_5193 from <i>P. syringae</i> 1448A  | This study |
| pET28a-PSPPH_4730   | pET28a containing ORF of PSPPH_4730 from <i>P. syringae</i> 1448A  | This study |
| pET28a-PSPPH_4858   | pET28a containing ORF of PSPPH_4858 from <i>P. syringae</i> 1448A  | This study |
| pET28a-PSPPH_4673   | pET28a containing ORF of PSPPH_4673 from <i>P. syringae</i> 1448A  | This study |

|                     |                                                                    |            |
|---------------------|--------------------------------------------------------------------|------------|
| pET28a-PSPPH_1393   | pET28a containing ORF of PSPPH_1393 from <i>P. syringae</i> 1448A  | This study |
| pET28a-PSPPH_0653   | pET28a containing ORF of PSPPH_0653 from <i>P. syringae</i> 1448A  | This study |
| pET28a-PSPPH_2151   | pET28a containing ORF of PSPPH_2151 from <i>P. syringae</i> 1448A  | This study |
| pET28a-PSPPH_2478   | pET28a containing ORF of PSPPH_2478 from <i>P. syringae</i> 1448A  | This study |
| pET28a-PSPPH_0226   | pET28a containing ORF of PSPPH_0226 from <i>P. syringae</i> 1448A  | This study |
| pET28a-PSPPH_5057   | pET28a containing ORF of PSPPH_5057 from <i>P. syringae</i> 1448A  | This study |
| pET28a-PSPPH_4324   | pET28a containing ORF of PSPPH_4324 from <i>P. syringae</i> 1448A  | This study |
| pET28a-PSPPH_1584   | pET28a containing ORF of PSPPH_1584 from <i>P. syringae</i> 1448A  | This study |
| pET28a-PSPPH_4694   | pET28a containing ORF of PSPPH_4694 from <i>P. syringae</i> 1448A  | This study |
| pET28a-PSPPH_2792   | pET28a containing ORF of PSPPH_2792 from <i>P. syringae</i> 1448A  | This study |
| pET28a-PSPPH_2327   | pET28a containing ORF of PSPPH_2327 from <i>P. syringae</i> 1448A  | This study |
| pET28a-PSPPH_2194   | pET28a containing ORF of PSPPH_2194 from <i>P. syringae</i> 1448A  | This study |
| pET28a-PSPPH_4674   | pET28a containing ORF of PSPPH_4674 from <i>P. syringae</i> 1448A  | This study |
| pET28a-PSPPH_2800   | pET28a containing ORF of PSPPH_2800 from <i>P. syringae</i> 1448A  | This study |
| pET28a-PSPPH_4644   | pET28a containing ORF of PSPPH_4644 from <i>P. syringae</i> 1448A  | This study |
| pET28a-PSPPH_2142   | pET28a containing ORF of PSPPH_2142 from <i>P. syringae</i> 1448A  | This study |
| pET28a-PSPPH_1011   | pET28a containing ORF of PSPPH_1011 from <i>P. syringae</i> 1448A  | This study |
| pET28a-PSPPH_2630   | pET28a containing ORF of PSPPH_2630 from <i>P. syringae</i> 1448A  | This study |
| pET28a- <i>cadR</i> | pET28a containing ORF of <i>cadR</i> from <i>P. syringae</i> 1448A | This study |
| pET28a-PSPPH_2539   | pET28a containing ORF of PSPPH_2539 from <i>P. syringae</i> 1448A  | This study |
| pET28a-PSPPH_2015   | pET28a containing ORF of PSPPH_2015 from <i>P. syringae</i> 1448A  | This study |
| pET28a-PSPPH_2149   | pET28a containing ORF of PSPPH_2149 from <i>P. syringae</i> 1448A  | This study |
| pET28a- <i>iclR</i> | pET28a containing ORF of <i>iclR</i> from <i>P. syringae</i> 1448A | This study |
| pET28a- <i>pcaR</i> | pET28a containing ORF of <i>pcaR</i> from <i>P. syringae</i> 1448A | This study |
| pET28a-PSPPH_1960   | pET28a containing ORF of PSPPH_1960 from <i>P. syringae</i> 1448A  | This study |
| pET28a-PSPPH_2665   | pET28a containing ORF of PSPPH_2665 from <i>P. syringae</i> 1448A  | This study |
| pET28a-PSPPH_2832   | pET28a containing ORF of PSPPH_2832 from <i>P. syringae</i> 1448A  | This study |
| pET28a-PSPPH_4612   | pET28a containing ORF of PSPPH_4612 from <i>P. syringae</i> 1448A  | This study |

|                     |                                                                    |            |
|---------------------|--------------------------------------------------------------------|------------|
| pET28a-PSPPH_5042   | pET28a containing ORF of PSPPH_5042 from <i>P. syringae</i> 1448A  | This study |
| pET28a-PSPPH_4377   | pET28a containing ORF of PSPPH_4377 from <i>P. syringae</i> 1448A  | This study |
| pET28a-PSPPH_2219   | pET28a containing ORF of PSPPH_2219 from <i>P. syringae</i> 1448A  | This study |
| pET28a-PSPPH_1244   | pET28a containing ORF of PSPPH_1244 from <i>P. syringae</i> 1448A  | This study |
| pET28a-PSPPH_1762   | pET28a containing ORF of PSPPH_1762 from <i>P. syringae</i> 1448A  | This study |
| pET28a-PSPPH_5054   | pET28a containing ORF of PSPPH_5054 from <i>P. syringae</i> 1448A  | This study |
| pET28a-PSPPH_4700   | pET28a containing ORF of PSPPH_4700 from <i>P. syringae</i> 1448A  | This study |
| pET28a-PSPPH_4356   | pET28a containing ORF of PSPPH_4356 from <i>P. syringae</i> 1448A  | This study |
| pET28a- <i>lrp</i>  | pET28a containing ORF of <i>lrp</i> from <i>P. syringae</i> 1448A  | This study |
| pET28a-PSPPH_0239   | pET28a containing ORF of PSPPH_0239 from <i>P. syringae</i> 1448A  | This study |
| pET28a-PSPPH_3155   | pET28a containing ORF of PSPPH_3155 from <i>P. syringae</i> 1448A  | This study |
| pET28a-PSPPH_2921   | pET28a containing ORF of PSPPH_2921 from <i>P. syringae</i> 1448A  | This study |
| pET28a-PSPPH_3817   | pET28a containing ORF of PSPPH_3817 from <i>P. syringae</i> 1448A  | This study |
| pET28a-PSPPH_2301   | pET28a containing ORF of PSPPH_2301 from <i>P. syringae</i> 1448A  | This study |
| pET28a-PSPPH_3022   | pET28a containing ORF of PSPPH_3022 from <i>P. syringae</i> 1448A  | This study |
| pET28a- <i>iciA</i> | pET28a containing ORF of <i>iciA</i> from <i>P. syringae</i> 1448A | This study |
| pET28a-PSPPH_3079   | pET28a containing ORF of PSPPH_3079 from <i>P. syringae</i> 1448A  | This study |
| pET28a-PSPPH_3464   | pET28a containing ORF of PSPPH_3464 from <i>P. syringae</i> 1448A  | This study |
| pET28a- <i>metR</i> | pET28a containing ORF of <i>metR</i> from <i>P. syringae</i> 1448A | This study |
| pET28a-PSPPH_0141   | pET28a containing ORF of PSPPH_0141 from <i>P. syringae</i> 1448A  | This study |
| pET28a-PSPPH_3233   | pET28a containing ORF of PSPPH_3233 from <i>P. syringae</i> 1448A  | This study |
| pET28a-PSPPH_3990   | pET28a containing ORF of PSPPH_3990 from <i>P. syringae</i> 1448A  | This study |
| pET28a-PSPPH_3460   | pET28a containing ORF of PSPPH_3460 from <i>P. syringae</i> 1448A  | This study |
| pET28a-PSPPH_1100   | pET28a containing ORF of PSPPH_1100 from <i>P. syringae</i> 1448A  | This study |
| pET28a-PSPPH_2439   | pET28a containing ORF of PSPPH_2439 from <i>P. syringae</i> 1448A  | This study |
| pET28a- <i>pcaQ</i> | pET28a containing ORF of <i>pcaQ</i> from <i>P. syringae</i> 1448A | This study |
| pET28a- <i>trpI</i> | pET28a containing ORF of <i>trpI</i> from <i>P. syringae</i> 1448A | This study |
| pET28a-PSPPH_2555   | pET28a containing ORF of PSPPH_2555 from <i>P. syringae</i> 1448A  | This study |

|                     |                                                                    |            |
|---------------------|--------------------------------------------------------------------|------------|
| pET28a-PSPPH_3611   | pET28a containing ORF of PSPPH_3611 from <i>P. syringae</i> 1448A  | This study |
| pET28a-PSPPH_0711   | pET28a containing ORF of PSPPH_0711 from <i>P. syringae</i> 1448A  | This study |
| pET28a- <i>mexT</i> | pET28a containing ORF of <i>mexT</i> from <i>P. syringae</i> 1448A | This study |
| pET28a-PSPPH_2469   | pET28a containing ORF of PSPPH_2469 from <i>P. syringae</i> 1448A  | This study |
| pET28a-PSPPH_4620   | pET28a containing ORF of PSPPH_4620 from <i>P. syringae</i> 1448A  | This study |
| pET28a-PSPPH_2772   | pET28a containing ORF of PSPPH_2772 from <i>P. syringae</i> 1448A  | This study |
| pET28a-PSPPH_2638   | pET28a containing ORF of PSPPH_2638 from <i>P. syringae</i> 1448A  | This study |
| pET28a- <i>cysB</i> | pET28a containing ORF of <i>cysB</i> from <i>P. syringae</i> 1448A | This study |
| pET28a-PSPPH_2693   | pET28a containing ORF of PSPPH_2693 from <i>P. syringae</i> 1448A  | This study |
| pET28a-PSPPH_1493   | pET28a containing ORF of PSPPH_1493 from <i>P. syringae</i> 1448A  | This study |
| pET28a-PSPPH_4998   | pET28a containing ORF of PSPPH_4998 from <i>P. syringae</i> 1448A  | This study |
| pET28a-PSPPH_1259   | pET28a containing ORF of PSPPH_1259 from <i>P. syringae</i> 1448A  | This study |
| pET28a-PSPPH_3798   | pET28a containing ORF of PSPPH_3798 from <i>P. syringae</i> 1448A  | This study |
| pET28a-PSPPH_2444   | pET28a containing ORF of PSPPH_2444 from <i>P. syringae</i> 1448A  | This study |
| pET28a- <i>oxyR</i> | pET28a containing ORF of <i>oxyR</i> from <i>P. syringae</i> 1448A | This study |
| pET28a-PSPPH_4638   | pET28a containing ORF of PSPPH_4638 from <i>P. syringae</i> 1448A  | This study |
| pET28a-PSPPH_0700   | pET28a containing ORF of PSPPH_0700 from <i>P. syringae</i> 1448A  | This study |
| pET28a-PSPPH_1435   | pET28a containing ORF of PSPPH_1435 from <i>P. syringae</i> 1448A  | This study |
| pET28a-PSPPH_2193   | pET28a containing ORF of PSPPH_2193 from <i>P. syringae</i> 1448A  | This study |
| pET28a-PSPPH_5144   | pET28a containing ORF of PSPPH_5144 from <i>P. syringae</i> 1448A  | This study |
| pET28a-PSPPH_3411   | pET28a containing ORF of PSPPH_3411 from <i>P. syringae</i> 1448A  | This study |
| pET28a-PSPPH_3278   | pET28a containing ORF of PSPPH_3278 from <i>P. syringae</i> 1448A  | This study |
| pET28a-PSPPH_2688   | pET28a containing ORF of PSPPH_2688 from <i>P. syringae</i> 1448A  | This study |
| pET28a-PSPPH_1737   | pET28a containing ORF of PSPPH_1737 from <i>P. syringae</i> 1448A  | This study |
| pET28a-PSPPH_1951   | pET28a containing ORF of PSPPH_1951 from <i>P. syringae</i> 1448A  | This study |
| pET28a-PSPPH_1758   | pET28a containing ORF of PSPPH_1758 from <i>P. syringae</i> 1448A  | This study |
| pET28a-PSPPH_0442   | pET28a containing ORF of PSPPH_0442 from <i>P. syringae</i> 1448A  | This study |
| pET28a-PSPPH_3014   | pET28a containing ORF of PSPPH_3014 from <i>P. syringae</i> 1448A  | This study |

|                      |                                                                     |            |
|----------------------|---------------------------------------------------------------------|------------|
| pET28a-PSPPH_2580    | pET28a containing ORF of PSPPH_2580 from <i>P. syringae</i> 1448A   | This study |
| pET28a-PSPPH_3618    | pET28a containing ORF of PSPPH_3618 from <i>P. syringae</i> 1448A   | This study |
| pET28a-PSPPH_2631    | pET28a containing ORF of PSPPH_2631 from <i>P. syringae</i> 1448A   | This study |
| pET28a-PSPPH_0077    | pET28a containing ORF of PSPPH_0077 from <i>P. syringae</i> 1448A   | This study |
| pET28a-PSPPH_2476    | pET28a containing ORF of PSPPH_2476 from <i>P. syringae</i> 1448A   | This study |
| pET28a-PSPPH_2236    | pET28a containing ORF of PSPPH_2236 from <i>P. syringae</i> 1448A   | This study |
| pET28a-PSPPH_2967    | pET28a containing ORF of PSPPH_2967 from <i>P. syringae</i> 1448A   | This study |
| pET28a-PSPPH_0589    | pET28a containing ORF of PSPPH_0589 from <i>P. syringae</i> 1448A   | This study |
| pET28a-PSPPH_1579    | pET28a containing ORF of PSPPH_1579 from <i>P. syringae</i> 1448A   | This study |
| pET28a-PSPPH_2454    | pET28a containing ORF of PSPPH_2454 from <i>P. syringae</i> 1448A   | This study |
| pET28a-PSPPH_2553    | pET28a containing ORF of PSPPH_2553 from <i>P. syringae</i> 1448A   | This study |
| pET28a-PSPPH_3241    | pET28a containing ORF of PSPPH_3241 from <i>P. syringae</i> 1448A   | This study |
| pET28a-PSPPH_5132    | pET28a containing ORF of PSPPH_5132 from <i>P. syringae</i> 1448A   | This study |
| pET28a-PSPPH_2689    | pET28a containing ORF of PSPPH_2689 from <i>P. syringae</i> 1448A   | This study |
| pET28a-PSPPH_0411    | pET28a containing ORF of PSPPH_0411 from <i>P. syringae</i> 1448A   | This study |
| pET28a-PSPPH_2300    | pET28a containing ORF of PSPPH_2300 from <i>P. syringae</i> 1448A   | This study |
| pET28a-PSPPH_3468    | pET28a containing ORF of PSPPH_3468 from <i>P. syringae</i> 1448A   | This study |
| pET28a-PSPPH_2491    | pET28a containing ORF of PSPPH_2491 from <i>P. syringae</i> 1448A   | This study |
| pET28a-PSPPH_3643    | pET28a containing ORF of PSPPH_3643 from <i>P. syringae</i> 1448A   | This study |
| pET28a-PSPPH_0031    | pET28a containing ORF of PSPPH_0031 from <i>P. syringae</i> 1448A   | This study |
| pET28a-PSPPH_2295    | pET28a containing ORF of PSPPH_2295 from <i>P. syringae</i> 1448A   | This study |
| pET28a-PSPPH_0218    | pET28a containing ORF of PSPPH_0218 from <i>P. syringae</i> 1448A   | This study |
| pET28a-PSPPH_1969    | pET28a containing ORF of PSPPH_1969 from <i>P. syringae</i> 1448A   | This study |
| pET28a-PSPPH_2983    | pET28a containing ORF of PSPPH_2983 from <i>P. syringae</i> 1448A   | This study |
| pET28a-PSPPH_2315    | pET28a containing ORF of PSPPH_2315 from <i>P. syringae</i> 1448A   | This study |
| pET28a-PSPPH_5138    | pET28a containing ORF of PSPPH_5138 from <i>P. syringae</i> 1448A   | This study |
| pET28a-PSPPH_4822    | pET28a containing ORF of PSPPH_4822 from <i>P. syringae</i> 1448A   | This study |
| pET28a- <i>lexA1</i> | pET28a containing ORF of <i>lexA1</i> from <i>P. syringae</i> 1448A | This study |

|                      |                                                                     |            |
|----------------------|---------------------------------------------------------------------|------------|
| pET28a- <i>lexA2</i> | pET28a containing ORF of <i>lexA2</i> from <i>P. syringae</i> 1448A | This study |
| pET28a-PSPPH_3936    | pET28a containing ORF of PSPPH_3936 from <i>P. syringae</i> 1448A   | This study |
| pET28a- <i>glpR</i>  | pET28a containing ORF of <i>glpR</i> from <i>P. syringae</i> 1448A  | This study |
| pET28a-PSPPH_5204    | pET28a containing ORF of PSPPH_5204 from <i>P. syringae</i> 1448A   | This study |
| pET28a-PSPPH_4844    | pET28a containing ORF of PSPPH_4844 from <i>P. syringae</i> 1448A   | This study |
| pET28a-PSPPH_2188    | pET28a containing ORF of PSPPH_2188 from <i>P. syringae</i> 1448A   | This study |
| pET28a- <i>srl</i>   | pET28a containing ORF of <i>srl</i> from <i>P. syringae</i> 1448A   | This study |
| pET28a-PSPPH_3577    | pET28a containing ORF of PSPPH_3577 from <i>P. syringae</i> 1448A   | This study |
| pET28a- <i>hutC</i>  | pET28a containing ORF of <i>hutC</i> from <i>P. syringae</i> 1448A  | This study |
| pET28a- <i>fur</i>   | pET28a containing ORF of <i>fur</i> from <i>P. syringae</i> 1448A   | This study |
| pET28a-PSPPH_3297    | pET28a containing ORF of PSPPH_3297 from <i>P. syringae</i> 1448A   | This study |
| pET28a-PSPPH_1136    | pET28a containing ORF of PSPPH_1136 from <i>P. syringae</i> 1448A   | This study |
| pET28a-PSPPH_0286    | pET28a containing ORF of PSPPH_0286 from <i>P. syringae</i> 1448A   | This study |
| pET28a-PSPPH_0263    | pET28a containing ORF of PSPPH_0263 from <i>P. syringae</i> 1448A   | This study |
| pET28a-PSPPH_4056    | pET28a containing ORF of PSPPH_4056 from <i>P. syringae</i> 1448A   | This study |
| pET28a-PSPPH_3031    | pET28a containing ORF of PSPPH_3031 from <i>P. syringae</i> 1448A   | This study |
| pET28a- <i>iscR</i>  | pET28a containing ORF of <i>iscR</i> from <i>P. syringae</i> 1448A  | This study |
| pET28a-PSPPH_1771    | pET28a containing ORF of PSPPH_1771 from <i>P. syringae</i> 1448A   | This study |
| pET28a-PSPPH_3004    | pET28a containing ORF of PSPPH_3004 from <i>P. syringae</i> 1448A   | This study |
| pET28a-PSPPH_0486    | pET28a containing ORF of PSPPH_0486 from <i>P. syringae</i> 1448A   | This study |
| pET28a-PSPPH_2055    | pET28a containing ORF of PSPPH_2055 from <i>P. syringae</i> 1448A   | This study |
| pET28a-PSPPH_1734    | pET28a containing ORF of PSPPH_1734 from <i>P. syringae</i> 1448A   | This study |
| pET28a-PSPPH_1776    | pET28a containing ORF of PSPPH_1776 from <i>P. syringae</i> 1448A   | This study |
| pET28a-PSPPH_3005    | pET28a containing ORF of PSPPH_3005 from <i>P. syringae</i> 1448A   | This study |
| pET28a-PSPPH_4637    | pET28a containing ORF of PSPPH_4637 from <i>P. syringae</i> 1448A   | This study |
| pET28a-PSPPH_3471    | pET28a containing ORF of PSPPH_3471 from <i>P. syringae</i> 1448A   | This study |
| pET28a-PSPPH_3923    | pET28a containing ORF of PSPPH_3923 from <i>P. syringae</i> 1448A   | This study |
| pET28a-PSPPH_5087    | pET28a containing ORF of PSPPH_5087 from <i>P. syringae</i> 1448A   | This study |



|                     |                                                                    |            |
|---------------------|--------------------------------------------------------------------|------------|
| pET28a-PSPPH_2859   | pET28a containing ORF of PSPPH_2859 from <i>P. syringae</i> 1448A  | This study |
| pET28a-PSPPH_1519   | pET28a containing ORF of PSPPH_1519 from <i>P. syringae</i> 1448A  | This study |
| pET28a-PSPPH_1800   | pET28a containing ORF of PSPPH_1800 from <i>P. syringae</i> 1448A  | This study |
| pET28a-PSPPH_1617   | pET28a containing ORF of PSPPH_1617 from <i>P. syringae</i> 1448A  | This study |
| pET28a- <i>phnF</i> | pET28a containing ORF of <i>phnF</i> from <i>P. syringae</i> 1448A | This study |
| pET28a- <i>vanR</i> | pET28a containing ORF of <i>vanR</i> from <i>P. syringae</i> 1448A | This study |
| pET28a-PSPPH_5194   | pET28a containing ORF of PSPPH_5194 from <i>P. syringae</i> 1448A  | This study |
| pET28a-PSPPH_2720   | pET28a containing ORF of PSPPH_2720 from <i>P. syringae</i> 1448A  | This study |
| pET28a-PSPPH_1222   | pET28a containing ORF of PSPPH_1222 from <i>P. syringae</i> 1448A  | This study |
| pET28a-PSPPH_1595   | pET28a containing ORF of PSPPH_1595 from <i>P. syringae</i> 1448A  | This study |
| pET28a-PSPPH_2423   | pET28a containing ORF of PSPPH_2423 from <i>P. syringae</i> 1448A  | This study |
| pET28a- <i>mgrA</i> | pET28a containing ORF of <i>mgrA</i> from <i>P. syringae</i> 1448A | This study |
| pET28a- <i>marR</i> | pET28a containing ORF of <i>marR</i> from <i>P. syringae</i> 1448A | This study |
| pET28a-PSPPH_4253   | pET28a containing ORF of PSPPH_4253 from <i>P. syringae</i> 1448A  | This study |
| pET28a-PSPPH_1233   | pET28a containing ORF of PSPPH_1233 from <i>P. syringae</i> 1448A  | This study |
| pET28a-PSPPH_2563   | pET28a containing ORF of PSPPH_2563 from <i>P. syringae</i> 1448A  | This study |
| pET28a-PSPPH_3048   | pET28a containing ORF of PSPPH_3048 from <i>P. syringae</i> 1448A  | This study |
| pET28a-PSPPH_1456   | pET28a containing ORF of PSPPH_1456 from <i>P. syringae</i> 1448A  | This study |
| pET28a-PSPPH_2432   | pET28a containing ORF of PSPPH_2432 from <i>P. syringae</i> 1448A  | This study |
| pET28a-PSPPH_2204   | pET28a containing ORF of PSPPH_2204 from <i>P. syringae</i> 1448A  | This study |
| pET28a-PSPPH_0755   | pET28a containing ORF of PSPPH_0755 from <i>P. syringae</i> 1448A  | This study |
| pET28a-PSPPH_1049   | pET28a containing ORF of PSPPH_1049 from <i>P. syringae</i> 1448A  | This study |
| pET28a-PSPPH_2106   | pET28a containing ORF of PSPPH_2106 from <i>P. syringae</i> 1448A  | This study |
| pET28a-PSPPH_4622   | pET28a containing ORF of PSPPH_4622 from <i>P. syringae</i> 1448A  | This study |
| pET28a-PSPPH_2407   | pET28a containing ORF of PSPPH_2407 from <i>P. syringae</i> 1448A  | This study |
| pET28a-PSPPH_1730   | pET28a containing ORF of PSPPH_1730 from <i>P. syringae</i> 1448A  | This study |
| pET28a-PSPPH_1728   | pET28a containing ORF of PSPPH_1728 from <i>P. syringae</i> 1448A  | This study |
| pET28a-PSPPH_4012   | pET28a containing ORF of PSPPH_4012 from <i>P. syringae</i> 1448A  | This study |

|                     |                                                                    |            |
|---------------------|--------------------------------------------------------------------|------------|
| pET28a-PSPPH_3487   | pET28a containing ORF of PSPPH_3487 from <i>P. syringae</i> 1448A  | This study |
| pET28a- <i>aefR</i> | pET28a containing ORF of <i>aefR</i> from <i>P. syringae</i> 1448A | This study |
| pET28a-PSPPH_2448   | pET28a containing ORF of PSPPH_2448 from <i>P. syringae</i> 1448A  | This study |
| pET28a-PSPPH_3066   | pET28a containing ORF of PSPPH_3066 from <i>P. syringae</i> 1448A  | This study |
| pET28a-PSPPH_3654   | pET28a containing ORF of PSPPH_3654 from <i>P. syringae</i> 1448A  | This study |
| pET28a-PSPPH_2305   | pET28a containing ORF of PSPPH_2305 from <i>P. syringae</i> 1448A  | This study |
| pET28a-PSPPH_2893   | pET28a containing ORF of PSPPH_2893 from <i>P. syringae</i> 1448A  | This study |
| pET28a-PSPPH_1097   | pET28a containing ORF of PSPPH_1097 from <i>P. syringae</i> 1448A  | This study |
| pET28a-PSPPH_3122   | pET28a containing ORF of PSPPH_3122 from <i>P. syringae</i> 1448A  | This study |
| pET28a-PSPPH_3486   | pET28a containing ORF of PSPPH_3486 from <i>P. syringae</i> 1448A  | This study |
| pET28a-PSPPH_2597   | pET28a containing ORF of PSPPH_2597 from <i>P. syringae</i> 1448A  | This study |
| pET28a-PSPPH_1962   | pET28a containing ORF of PSPPH_1962 from <i>P. syringae</i> 1448A  | This study |
| pET28a-PSPPH_3027   | pET28a containing ORF of PSPPH_3027 from <i>P. syringae</i> 1448A  | This study |
| pET28a-PSPPH_2994   | pET28a containing ORF of PSPPH_2994 from <i>P. syringae</i> 1448A  | This study |
| pET28a-PSPPH_2214   | pET28a containing ORF of PSPPH_2214 from <i>P. syringae</i> 1448A  | This study |
| pET28a-PSPPH_4495   | pET28a containing ORF of PSPPH_4495 from <i>P. syringae</i> 1448A  | This study |
| pET28a-PSPPH_3202   | pET28a containing ORF of PSPPH_3202 from <i>P. syringae</i> 1448A  | This study |
| pET28a-PSPPH_2733   | pET28a containing ORF of PSPPH_2733 from <i>P. syringae</i> 1448A  | This study |
| pET28a-PSPPH_1670   | pET28a containing ORF of PSPPH_1670 from <i>P. syringae</i> 1448A  | This study |
| pET28a-PSPPH_3479   | pET28a containing ORF of PSPPH_3479 from <i>P. syringae</i> 1448A  | This study |
| pET28a-PSPPH_4788   | pET28a containing ORF of PSPPH_4788 from <i>P. syringae</i> 1448A  | This study |
| pET28a-PSPPH_4320   | pET28a containing ORF of PSPPH_4320 from <i>P. syringae</i> 1448A  | This study |
| pET28a-PSPPH_0376   | pET28a containing ORF of PSPPH_0376 from <i>P. syringae</i> 1448A  | This study |
| pET28a-PSPPH_0735   | pET28a containing ORF of PSPPH_0735 from <i>P. syringae</i> 1448A  | This study |
| pET28a-PSPPH_3268   | pET28a containing ORF of PSPPH_3268 from <i>P. syringae</i> 1448A  | This study |
| pET28a-PSPPH_4899   | pET28a containing ORF of PSPPH_4899 from <i>P. syringae</i> 1448A  | This study |
| pET28a-PSPPH_4448   | pET28a containing ORF of PSPPH_4448 from <i>P. syringae</i> 1448A  | This study |
| pET28a-PSPPH_1651   | pET28a containing ORF of PSPPH_1651 from <i>P. syringae</i> 1448A  | This study |

|                      |                                                                     |                          |
|----------------------|---------------------------------------------------------------------|--------------------------|
| pET28a-PSPPH_2984    | pET28a containing ORF of PSPPH_2984 from <i>P. syringae</i> 1448A   | This study               |
| pET28a-PSPPH_3872    | pET28a containing ORF of PSPPH_3872 from <i>P. syringae</i> 1448A   | This study               |
| pET28a-PSPPH_2774    | pET28a containing ORF of PSPPH_2774 from <i>P. syringae</i> 1448A   | This study               |
| pET28a-PSPPH_3983    | pET28a containing ORF of PSPPH_3983 from <i>P. syringae</i> 1448A   | This study               |
| pET28a-PSPPH_2905    | pET28a containing ORF of PSPPH_2905 from <i>P. syringae</i> 1448A   | This study               |
| pET28a- <i>betI</i>  | pET28a containing ORF of <i>betI</i> from <i>P. syringae</i> 1448A  | This study               |
| pET28a-PSPPH_0102    | pET28a containing ORF of PSPPH_0102 from <i>P. syringae</i> 1448A   | This study               |
| pET28a-PSPPH_0101    | pET28a containing ORF of PSPPH_0101 from <i>P. syringae</i> 1448A   | This study               |
| pET28a-PSPPH_4920    | pET28a containing ORF of PSPPH_4920 from <i>P. syringae</i> 1448A   | This study               |
| pET28a-PSPPH_3182    | pET28a containing ORF of PSPPH_3182 from <i>P. syringae</i> 1448A   | This study               |
| pET28a- <i>dksA2</i> | pET28a containing ORF of <i>dksA2</i> from <i>P. syringae</i> 1448A | This study               |
| pET28a-PSPPH_5139    | pET28a containing ORF of PSPPH_5139 from <i>P. syringae</i> 1448A   | This study               |
| pET28a-PSPPH_4336    | pET28a containing ORF of PSPPH_4336 from <i>P. syringae</i> 1448A   | This study               |
| pET28a- <i>sfsA</i>  | pET28a containing ORF of <i>sfsA</i> from <i>P. syringae</i> 1448A  | This study               |
| pET28a- <i>algQ</i>  | pET28a containing ORF of <i>algQ</i> from <i>P. syringae</i> 1448A  | This study               |
| pET28a- <i>lon1</i>  | pET28a containing ORF of <i>lon1</i> from <i>P. syringae</i> 1448A  | Hua <i>et al.</i> , 2020 |



|                                       |                                                                                                                    |
|---------------------------------------|--------------------------------------------------------------------------------------------------------------------|
| Barcode 71R                           | TGTGAGCCAAGGAGTTG GCAGGCCTTC TTGTCTTCCTAAGACCGC                                                                    |
| Barcode 72R                           | TGTGAGCCAAGGAGTTG TGGCAAGCTA TTGTCTTCCTAAGACCGC                                                                    |
| Barcode 73R                           | TGTGAGCCAAGGAGTTG GAGCATTGTC TTGTCTTCCTAAGACCGC                                                                    |
| Barcode 74R                           | TGTGAGCCAAGGAGTTG TGTGATTAGC TTGTCTTCCTAAGACCGC                                                                    |
| Barcode 75R                           | TGTGAGCCAAGGAGTTG CCTATGGACT TTGTCTTCCTAAGACCGC                                                                    |
| Barcode 76R                           | TGTGAGCCAAGGAGTTG TAGGCGATAG TTGTCTTCCTAAGACCGC                                                                    |
| Barcode 77R                           | TGTGAGCCAAGGAGTTG AGACCACGAT TTGTCTTCCTAAGACCGC                                                                    |
| Barcode 78R                           | TGTGAGCCAAGGAGTTG GTATTAGCCA TTGTCTTCCTAAGACCGC                                                                    |
| Barcode 79R                           | TGTGAGCCAAGGAGTTG CTCTGCACTG TTGTCTTCCTAAGACCGC                                                                    |
| Barcode 80R                           | TGTGAGCCAAGGAGTTG ACCAGCCTGA TTGTCTTCCTAAGACCGC                                                                    |
| Barcode 81R                           | TGTGAGCCAAGGAGTTG GCGTGAGTAT TTGTCTTCCTAAGACCGC                                                                    |
| Barcode 82R                           | TGTGAGCCAAGGAGTTG CGCGGAGCAT TTGTCTTCCTAAGACCGC                                                                    |
| Barcode 83R                           | TGTGAGCCAAGGAGTTG CAAGTTCACA TTGTCTTCCTAAGACCGC                                                                    |
| Barcode 84R                           | TGTGAGCCAAGGAGTTG AGCACCTCTC TTGTCTTCCTAAGACCGC                                                                    |
| Barcode 85R                           | TGTGAGCCAAGGAGTTG TTACAGTGCA TTGTCTTCCTAAGACCGC                                                                    |
| Barcode 86R                           | TGTGAGCCAAGGAGTTG TTGCCTAGGC TTGTCTTCCTAAGACCGC                                                                    |
| Barcode 87R                           | TGTGAGCCAAGGAGTTG GCTATGATGG TTGTCTTCCTAAGACCGC                                                                    |
| Barcode 88R                           | TGTGAGCCAAGGAGTTG AATTACCATG TTGTCTTCCTAAGACCGC                                                                    |
| Barcode 89R                           | TGTGAGCCAAGGAGTTG AGACATGGTG TTGTCTTCCTAAGACCGC                                                                    |
| Barcode 90R                           | TGTGAGCCAAGGAGTTG CCAGACATAT TTGTCTTCCTAAGACCGC                                                                    |
| Barcode 91R                           | TGTGAGCCAAGGAGTTG ACGCTTCCTT TTGTCTTCCTAAGACCGC                                                                    |
| Barcode 92R                           | TGTGAGCCAAGGAGTTG GACGTCTTGA TTGTCTTCCTAAGACCGC                                                                    |
| Barcode 93R                           | TGTGAGCCAAGGAGTTG TACTGAGCGG TTGTCTTCCTAAGACCGC                                                                    |
| Barcode 94R                           | TGTGAGCCAAGGAGTTG TGTACACACC TTGTCTTCCTAAGACCGC                                                                    |
| Barcode 95R                           | TGTGAGCCAAGGAGTTG CTTACGTGAA TTGTCTTCCTAAGACCGC                                                                    |
| Barcode 96R                           | TGTGAGCCAAGGAGTTG GTGTGGAACC TTGTCTTCCTAAGACCGC                                                                    |
| Barcode 97R                           | TGTGAGCCAAGGAGTTG AAGAATACCT TTGTCTTCCTAAGACCGC                                                                    |
| Barcode 98R                           | TGTGAGCCAAGGAGTTG GTTGCATTCTG TTGTCTTCCTAAGACCGC                                                                   |
| Barcode 99R                           | TGTGAGCCAAGGAGTTG CGCCGTTGAA TTGTCTTCCTAAGACCGC                                                                    |
| Barcode 100R                          | TGTGAGCCAAGGAGTTG TTCCGCCGAG TTGTCTTCCTAAGACCGC                                                                    |
| Barcode 101R                          | TGTGAGCCAAGGAGTTG CCATTACCGT TTGTCTTCCTAAGACCGC                                                                    |
| Barcode 102R                          | TGTGAGCCAAGGAGTTG ACGTCGGATC TTGTCTTCCTAAGACCGC                                                                    |
| Barcode 103R                          | TGTGAGCCAAGGAGTTG TGTATCGTGA TTGTCTTCCTAAGACCGC                                                                    |
| Barcode 104R                          | TGTGAGCCAAGGAGTTG GAAGAGAATC TTGTCTTCCTAAGACCGC                                                                    |
| Barcode 114R                          | TGTGAGCCAAGGAGTTG CTGACTCTGG TTGTCTTCCTAAGACCGC                                                                    |
| Barcode 115R                          | TGTGAGCCAAGGAGTTG ACTGCCTGTT TTGTCTTCCTAAGACCGC                                                                    |
| Barcode 116R                          | TGTGAGCCAAGGAGTTG GTCATGGAGC TTGTCTTCCTAAGACCGC                                                                    |
| Barcode 117R                          | TGTGAGCCAAGGAGTTG GGATAGACAT TTGTCTTCCTAAGACCGC                                                                    |
| Barcode 121R                          | TGTGAGCCAAGGAGTTG TTGATCAAGG TTGTCTTCCTAAGACCGC                                                                    |
| Barcode 122R                          | TGTGAGCCAAGGAGTTG TGCCACTTCC TTGTCTTCCTAAGACCGC                                                                    |
| Barcode 123R                          | TGTGAGCCAAGGAGTTG GTAGAATGTT TTGTCTTCCTAAGACCGC                                                                    |
| Barcode 124R                          | TGTGAGCCAAGGAGTTG GACTCGCGTC TTGTCTTCCTAAGACCGC                                                                    |
| Barcode 125R                          | TGTGAGCCAAGGAGTTG AGTGTATAG TTGTCTTCCTAAGACCGC                                                                     |
| Barcode 126R                          | TGTGAGCCAAGGAGTTG ACACGAGACT TTGTCTTCCTAAGACCGC                                                                    |
| Barcode 127R                          | TGTGAGCCAAGGAGTTG CATAGGCCGA TTGTCTTCCTAAGACCGC                                                                    |
| Barcode 128R                          | TGTGAGCCAAGGAGTTG CCGTCTGCAA TTGTCTTCCTAAGACCGC                                                                    |
| <b>2. Primers for Illumina system</b> |                                                                                                                    |
| SELEX-F                               | AATGATACGGCGACCACCGAGATCTACAC                                                                                      |
| SELEX-R                               | CAAGCAGAAGACGGCATAACGAGAT                                                                                          |
| N50N70                                | TCCCTACACGAC GCTCTTCCGATCT<br>NNNNNNNNNNNNNNNNNNNNNNNNNNNNNNNNNNNNNNNNNNNNNN<br>GATCGGAAGAGC ACACGTCTGAACTCCAGTCAC |
| N501                                  | AATGATACGGCGACCACCGAGATCTACAC TAGATCGC<br>ACACTCTTCCCTACACGAC GCTCTTCCGATCT                                        |
| N502                                  | AATGATACGGCGACCACCGAGATCTACAC CTCTCTAT<br>ACACTCTTCCCTACACGAC GCTCTTCCGATCT                                        |

|       |                                                                              |
|-------|------------------------------------------------------------------------------|
| N503  | AATGATACGGCGACCACCGAGATCTACAC TATCCTCT<br>ACACTCTTTCCCTACACGAC GCTCTTCCGATCT |
| N504  | AATGATACGGCGACCACCGAGATCTACAC AGAGTAGA<br>ACACTCTTTCCCTACACGAC GCTCTTCCGATCT |
| N505  | AATGATACGGCGACCACCGAGATCTACAC GTAAGGAG<br>ACACTCTTTCCCTACACGAC GCTCTTCCGATCT |
| N506  | AATGATACGGCGACCACCGAGATCTACAC ACTGCATA<br>ACACTCTTTCCCTACACGAC GCTCTTCCGATCT |
| N507  | AATGATACGGCGACCACCGAGATCTACAC AAGGAGTA<br>ACACTCTTTCCCTACACGAC GCTCTTCCGATCT |
| N508  | AATGATACGGCGACCACCGAGATCTACAC CTAAGCCT<br>ACACTCTTTCCCTACACGAC GCTCTTCCGATCT |
| N701  | CAAGCAGAAGACGGCATAACGAGAT TCGCCTTA<br>GTGACTGGAGTTCAGACGTGT                  |
| N702  | CAAGCAGAAGACGGCATAACGAGAT CTAGTACG<br>GTGACTGGAGTTCAGACGTGT                  |
| N703  | CAAGCAGAAGACGGCATAACGAGAT TTCTGCCT<br>GTGACTGGAGTTCAGACGTGT                  |
| N704  | CAAGCAGAAGACGGCATAACGAGAT GCTCAGGA<br>GTGACTGGAGTTCAGACGTGT                  |
| N705  | CAAGCAGAAGACGGCATAACGAGAT AGGAGTCC<br>GTGACTGGAGTTCAGACGTGT                  |
| N706  | CAAGCAGAAGACGGCATAACGAGAT CATGCCTA<br>GTGACTGGAGTTCAGACGTGT                  |
| N707  | CAAGCAGAAGACGGCATAACGAGAT GTAGAGAG<br>GTGACTGGAGTTCAGACGTGT                  |
| N708  | CAAGCAGAAGACGGCATAACGAGAT CCTCTCTG<br>GTGACTGGAGTTCAGACGTGT                  |
| N709  | CAAGCAGAAGACGGCATAACGAGAT AGCGTAGC<br>GTGACTGGAGTTCAGACGTGT                  |
| N710  | CAAGCAGAAGACGGCATAACGAGAT CAGCCTCG<br>GTGACTGGAGTTCAGACGTGT                  |
| N711  | CAAGCAGAAGACGGCATAACGAGAT TGCCTCTT<br>GTGACTGGAGTTCAGACGTGT                  |
| N712  | CAAGCAGAAGACGGCATAACGAGAT TCCTCTAC<br>GTGACTGGAGTTCAGACGTGT                  |
| SA501 | AATGATACGGCGACCACCGAGATCTACAC ATCGTACG<br>ACACTCTTTCCCTACACGAC GCTCTTCCGATCT |
| SA502 | AATGATACGGCGACCACCGAGATCTACAC ACTATCTG<br>ACACTCTTTCCCTACACGAC GCTCTTCCGATCT |
| SA503 | AATGATACGGCGACCACCGAGATCTACAC TAGCGAGT<br>ACACTCTTTCCCTACACGAC GCTCTTCCGATCT |
| SA504 | AATGATACGGCGACCACCGAGATCTACAC CTGCGTGT<br>ACACTCTTTCCCTACACGAC GCTCTTCCGATCT |
| SA505 | AATGATACGGCGACCACCGAGATCTACAC TCATCGAG<br>ACACTCTTTCCCTACACGAC GCTCTTCCGATCT |
| SA506 | AATGATACGGCGACCACCGAGATCTACAC CGTGAGTG<br>ACACTCTTTCCCTACACGAC GCTCTTCCGATCT |
| SA507 | AATGATACGGCGACCACCGAGATCTACAC GGATATCT<br>ACACTCTTTCCCTACACGAC GCTCTTCCGATCT |
| SA508 | AATGATACGGCGACCACCGAGATCTACAC GACACCGT<br>ACACTCTTTCCCTACACGAC GCTCTTCCGATCT |
| SA701 | CAAGCAGAAGACGGCATAACGAGAT CGAGAGTT<br>GTGACTGGAGTTCAGACGTGT                  |
| SA702 | CAAGCAGAAGACGGCATAACGAGAT GACATAGT<br>GTGACTGGAGTTCAGACGTGT                  |

|       |                                                            |
|-------|------------------------------------------------------------|
| SA703 | CAAGCAGAAGACGGCATACGAGAT ACGCTACT<br>GTGACTGGAGTTCAGACGTGT |
| SA704 | CAAGCAGAAGACGGCATACGAGAT ACTCACAG<br>GTGACTGGAGTTCAGACGTGT |
| SA705 | CAAGCAGAAGACGGCATACGAGAT TGAGTAGG<br>GTGACTGGAGTTCAGACGTGT |
| SA706 | CAAGCAGAAGACGGCATACGAGAT CTGCGTAG<br>GTGACTGGAGTTCAGACGTGT |
| SA707 | CAAGCAGAAGACGGCATACGAGAT TAGTCTCC<br>GTGACTGGAGTTCAGACGTGT |
| SA708 | CAAGCAGAAGACGGCATACGAGAT CGAGCGAC<br>GTGACTGGAGTTCAGACGTGT |
| SA709 | CAAGCAGAAGACGGCATACGAGAT ACTACGAC<br>GTGACTGGAGTTCAGACGTGT |
| SA710 | CAAGCAGAAGACGGCATACGAGAT GTCTGCTA<br>GTGACTGGAGTTCAGACGTGT |
| SA711 | CAAGCAGAAGACGGCATACGAGAT GTCTATGA<br>GTGACTGGAGTTCAGACGTGT |
| SA712 | CAAGCAGAAGACGGCATACGAGAT TATAGCGA<br>GTGACTGGAGTTCAGACGTGT |
