# Supplementary material for: A compendium of DNA-binding specificities of transcription factors in Pseudomonas syringae
Source: PubMed Central journal article supplement (PMC7532196; doi:10.1038/s41467-020-18744-7), 2020-10-02
Supplement: 41467_2020_18744_MOESM4_ESM.pdf [file 41467_2020_18744_MOESM4_ESM.pdf]

Supplementary Data 1

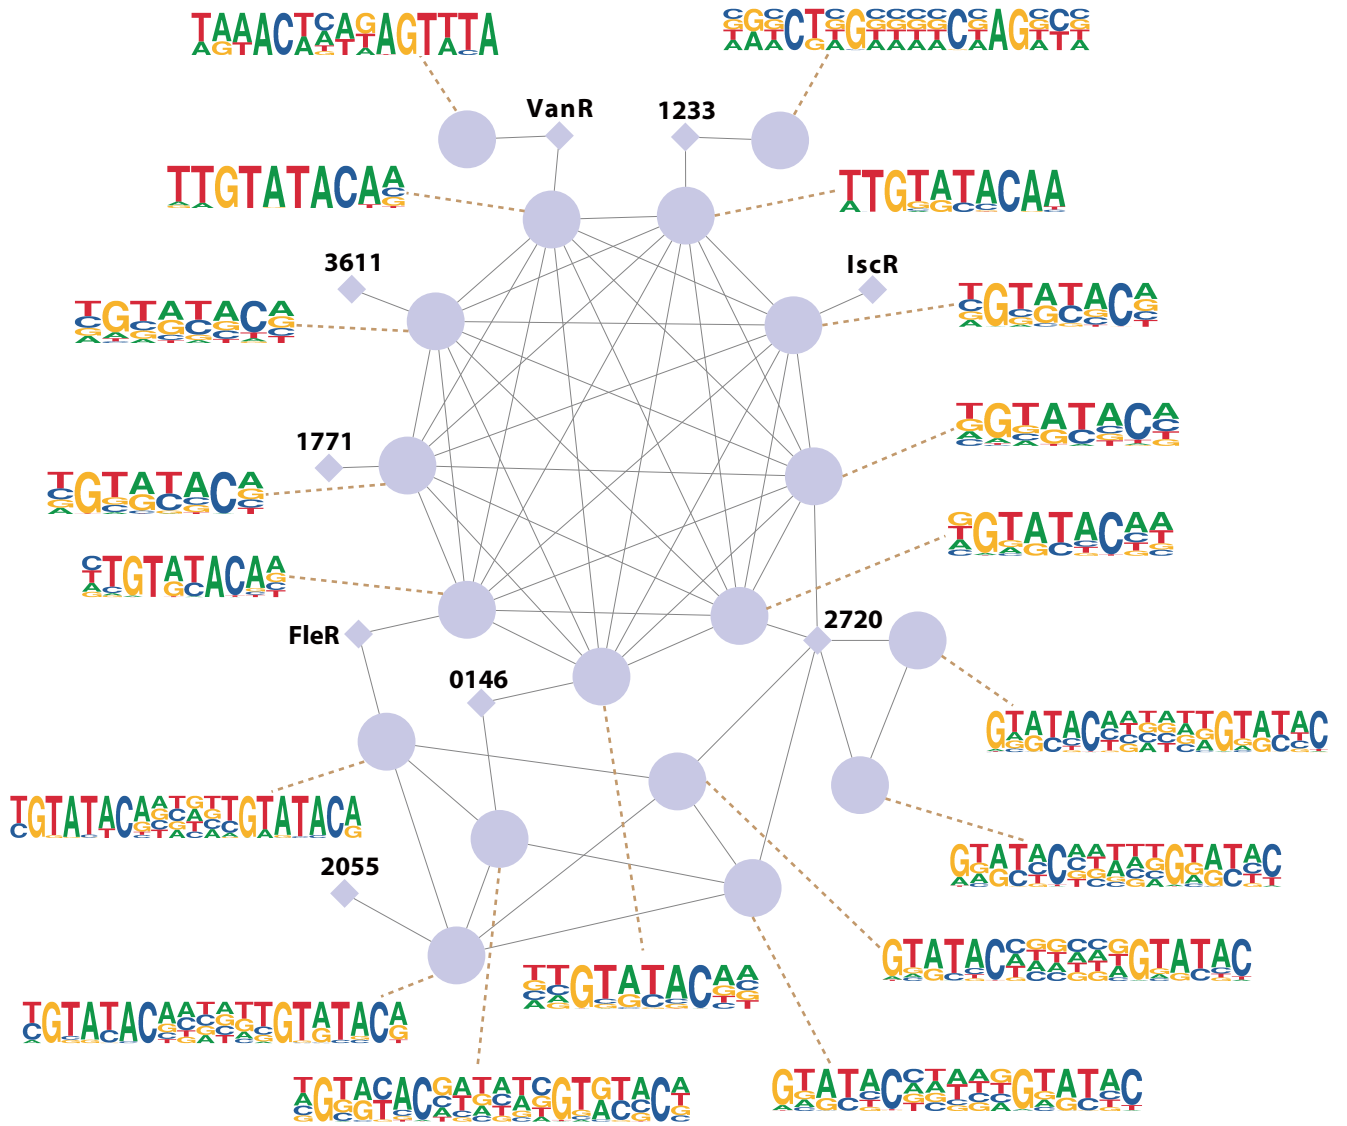

Module 1

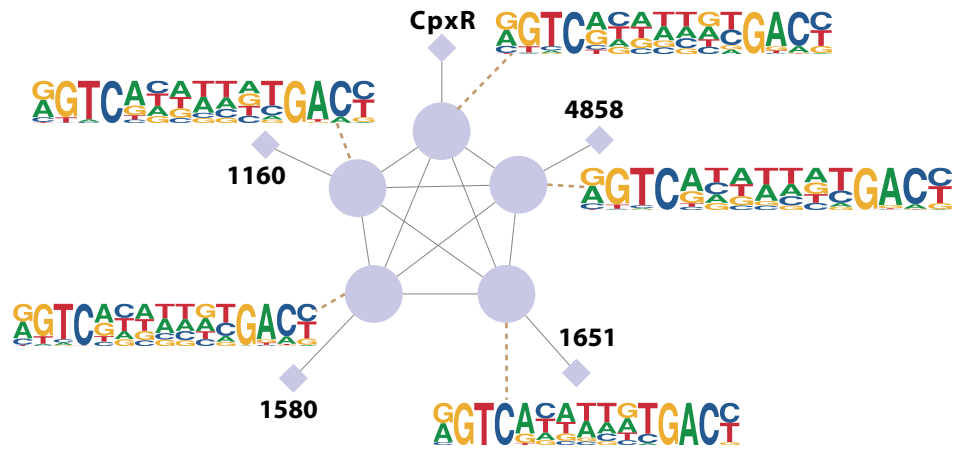

Module 2

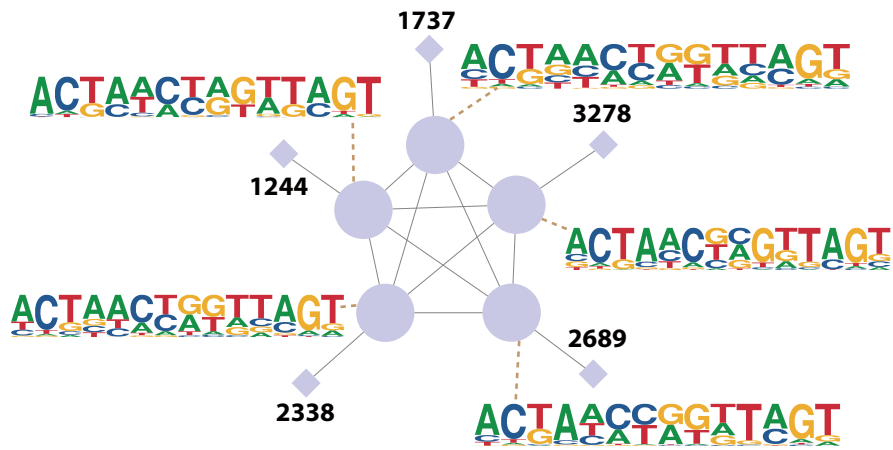

Module 3

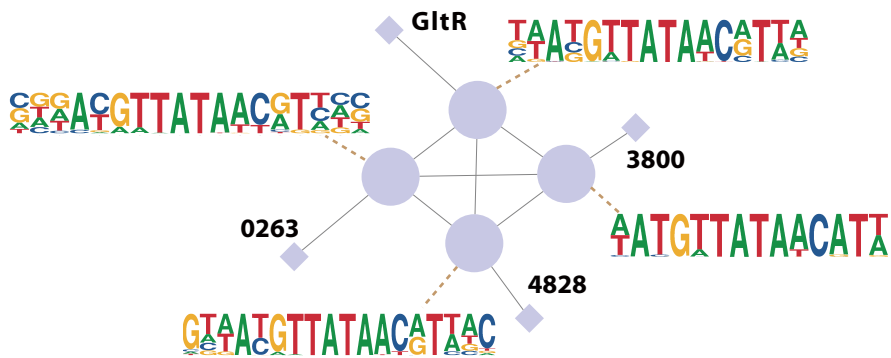

Module 4

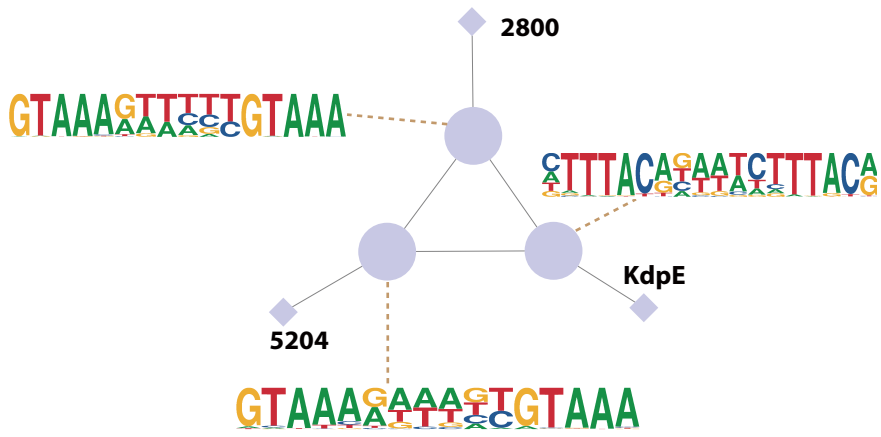

Module 5

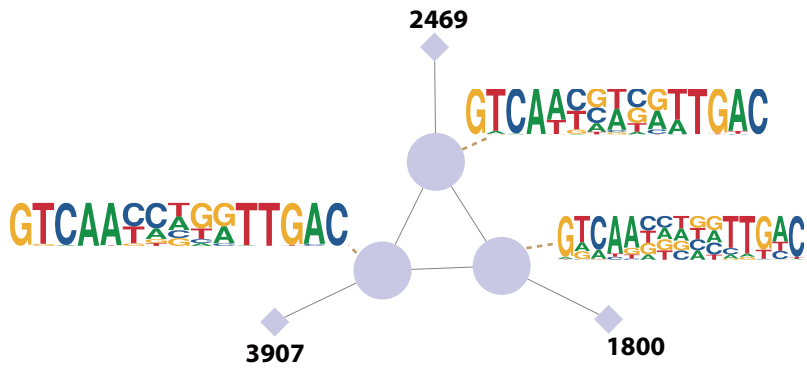

Module 6

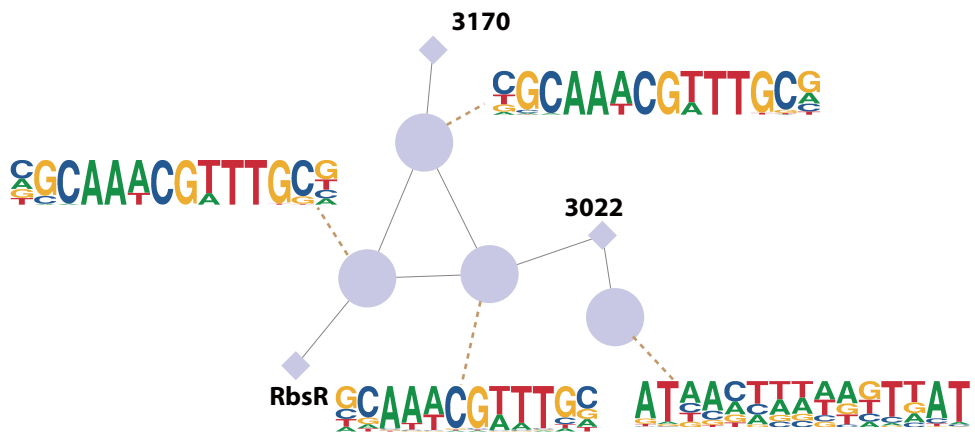

Module 7

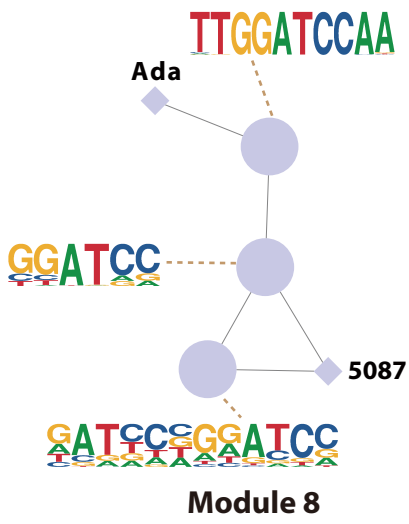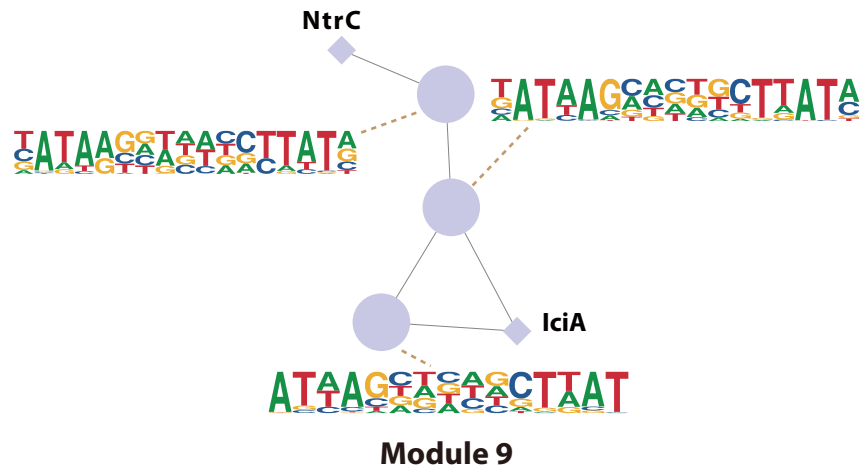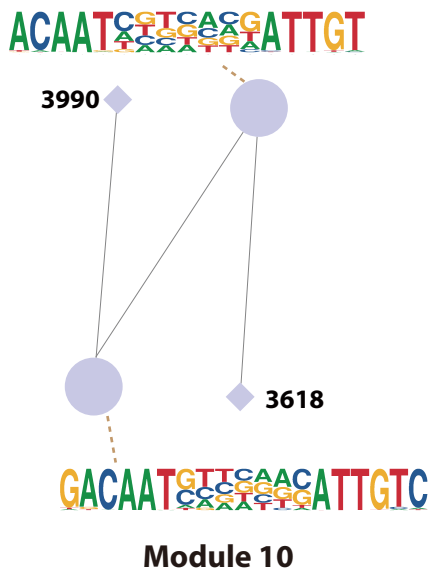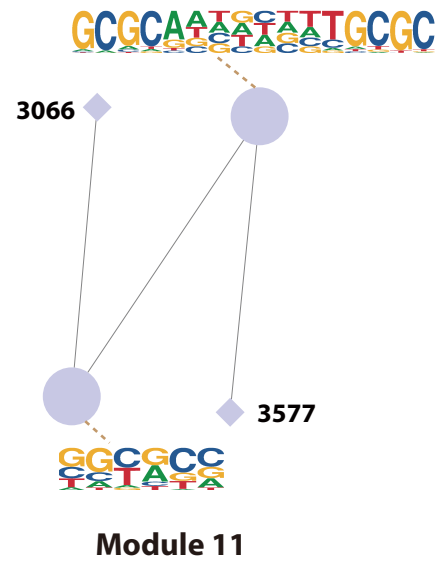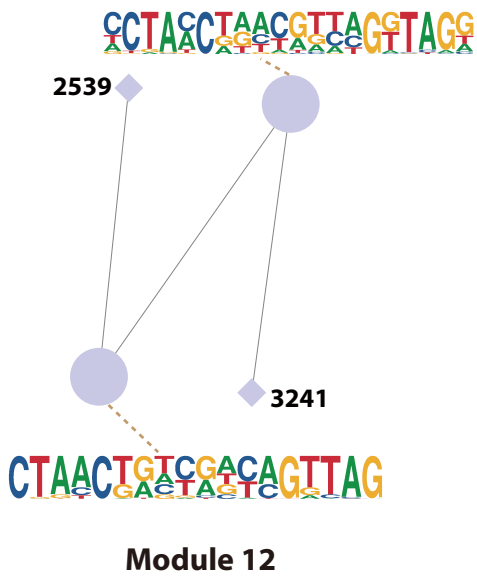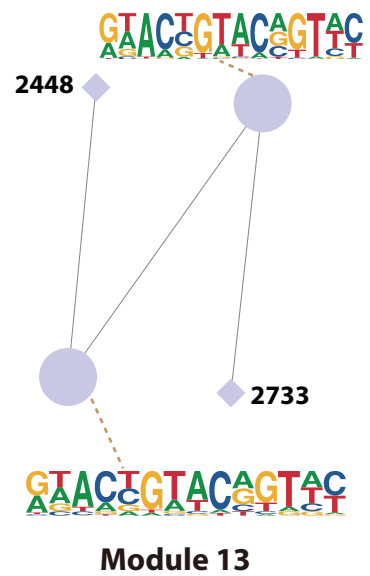

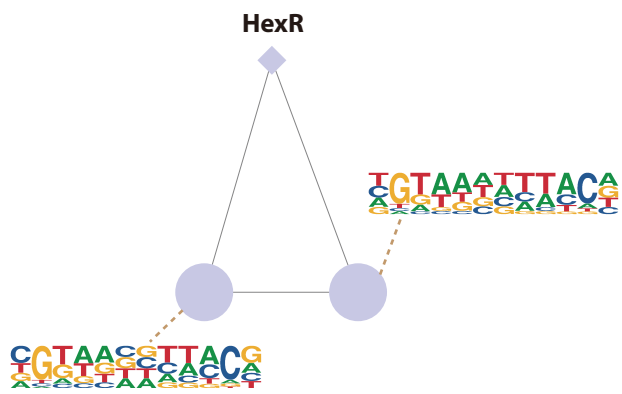

Module 14

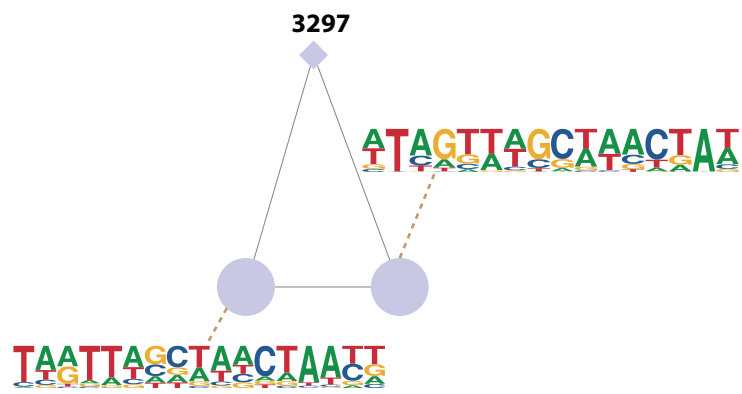

Module 15

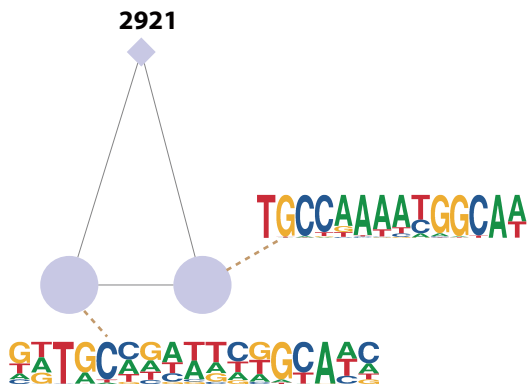

Module 16

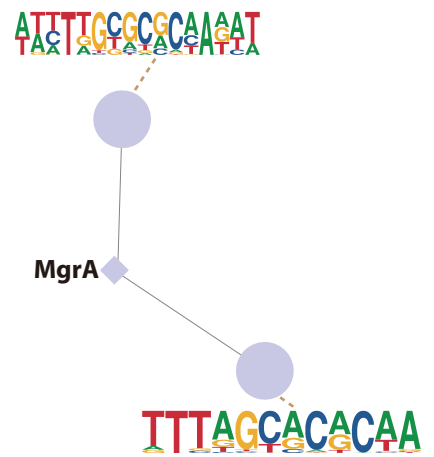

Module 17

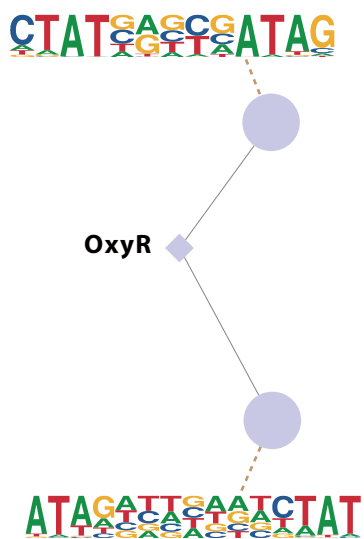

Module 18

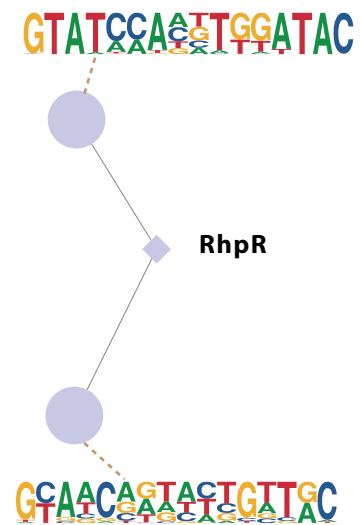

Module 19

CadR

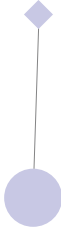

AGTGTACGATCGTACACT  
GGTACACCTGACACT

Module 20

4730

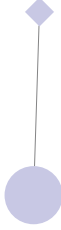

TGAGAGGGGCTCTCA  
CTTATTACTCA

Module 21

4612

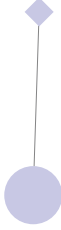

CGGGTAGGGAAAG  
TAACTGATAGGTA

Module 22

Fis

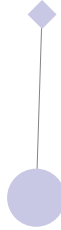

TGTTCAAATTTTGAACA  
GATGTTTAACTTTT

Module 23

4419

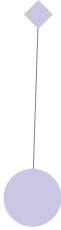

GGTATTAATGCTTAAGTAT  
ATGATTAATGCTTAAGTAT

Module 24

Fur

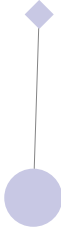

TGCGAATGTGACGTCATTG  
CACTGATGACGTCATTG

Module 25

PcaR

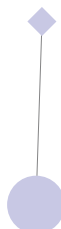

CGTACAGTGTCCG  
TTTGTGTCCG

Module 26

TctD

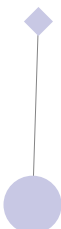

ATTAATAAATAGTTAGT  
ATTAATAAATAGTTAGT

Module 27

MetR

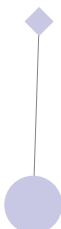

ATGAAAACSTTTTCAT  
CTTCTTAACTTTCAT

Module 28

3779

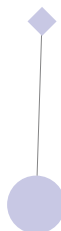

GCCGACGGCT  
GCGGCT

Module 29

3654

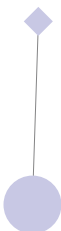

GGATATC  
CAATATC

Module 30

2315

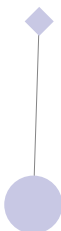

TCTGTATGTTAACATACAGA  
AGTGTATGTTAACATACAGA

Module 31

3547

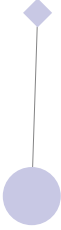

GTAAAGCCCGCCCGGTCCGGSCCGGCTTAC  
CTAATTAAGGTAATACCAAAATAG

Module 32

AefR

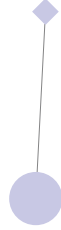

AACTGCACAGTGTAGTT  
CACTACACAGTGTAGTT

Module 33

3233

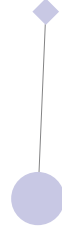

TATACATGCACGTGCATGTATA  
TATACATGCACGTGCATGTATA

Module 34

3220

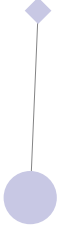

TGTGAGTACTCACA  
TGTGAGTACTCACA

Module 35

3079

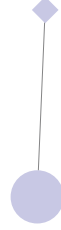

ATGCATAGTACTCAAT  
ATGCATAGTACTCAAT

Module 36

3048

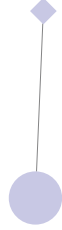

GTCATATAAT  
GTCATATAAT

Module 37

3031

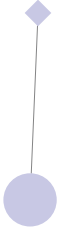

ACAAGTITTAACCTGT  
ACAAGTITTAACCTGT

Module 38

3004

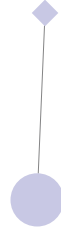

TCCTAAATATTAGGA  
TCCTAAATATTAGGA

Module 39

2772

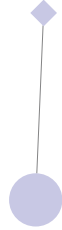

AATGCTCATGAGCATT  
AATGCTCATGAGCATT

Module 40

2693

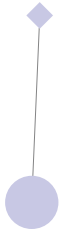

CATGCAGCATG  
CATGCAGCATG

Module 41

2688

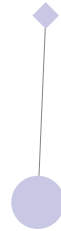

ATTATTGAAT  
ATTATTGAAT

Module 42

LexA1

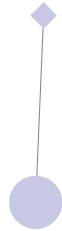

TGTACATGCATGTACA  
TGTACATGCATGTACA

Module 43

5193

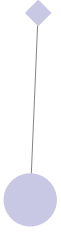

TAACTATGATGTTA

Module 44

5171

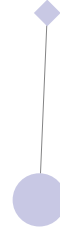

GTATACTAASATATAC

Module 45

2295

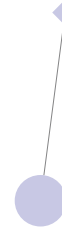

GTTATATCGGCGCTAAC

Module 46

PcaQ

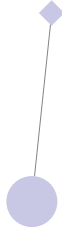

TTTGGTTATGGA

Module 47

1960

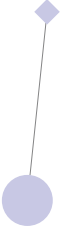

STGGGATCGCTCCAC

Module 48

1259

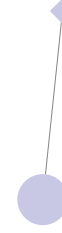

TCAACTGTTGA

Module 49

1195

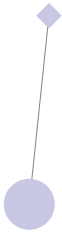

GGTAAATCACGGCTCC

Module 50

1011

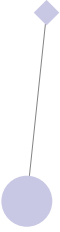

TGTATATACA

Module 51

TsiR

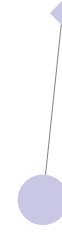

CACCCACGGCGG

Module 52

0778

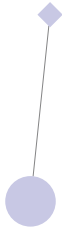

CCAGATCTGG

Module 53

Vfr

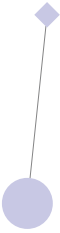

TGTGACGTACGCACA

Module 54

PilR

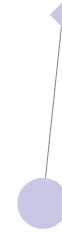

CCGCCGTGGGCTGATATCCCGTGG

Module 55



5057

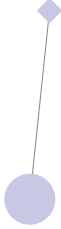

AAGCGGCCTGCTGTT

Module 56

5145

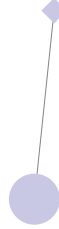

TITGTATACAGTACGTATACAAA

Module 57

TrpI

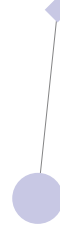

GTGAGTCAAT

Module 58

3479

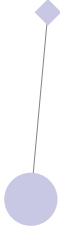

TAACTAATTAGTT

Module 59

3471

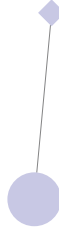

GAGACACAAGTATTGGTCTC

Module 60

3294

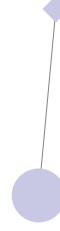

CTGACAAAAATTGTCAG

Module 61

GntR

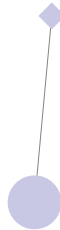

GGATAGCGCTGTCT

Module 62

2563

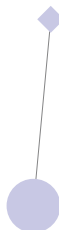

CATATAAATAATTATATG

Module 63

2491

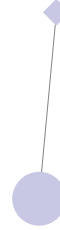

GTCTGTCC

Module 64

2432

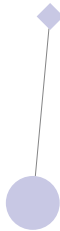

GTTAACTTCTTAATT

Module 65

GacA

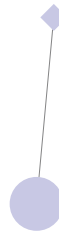

GTTAGATTTAATTTAAATCTAAC

Module 66

0642

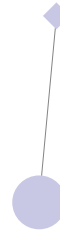

IGTAGGGATTTCCTACA

Module 67

0589

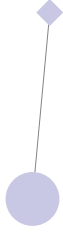

ACTAACCTAAGGTTAGT  
TATTATCAG

module 68

0442

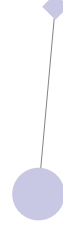

GTAATTATTAC  
GAAATTA

module 69
