# Supplementary material for: A compendium of DNA-binding specificities of transcription factors in Pseudomonas syringae
Source: PubMed Central journal article supplement (PMC7532196; doi:10.1038/s41467-020-18744-7), 2020-10-02

e. Transcriptional Regulatory Network of Phytotoxin

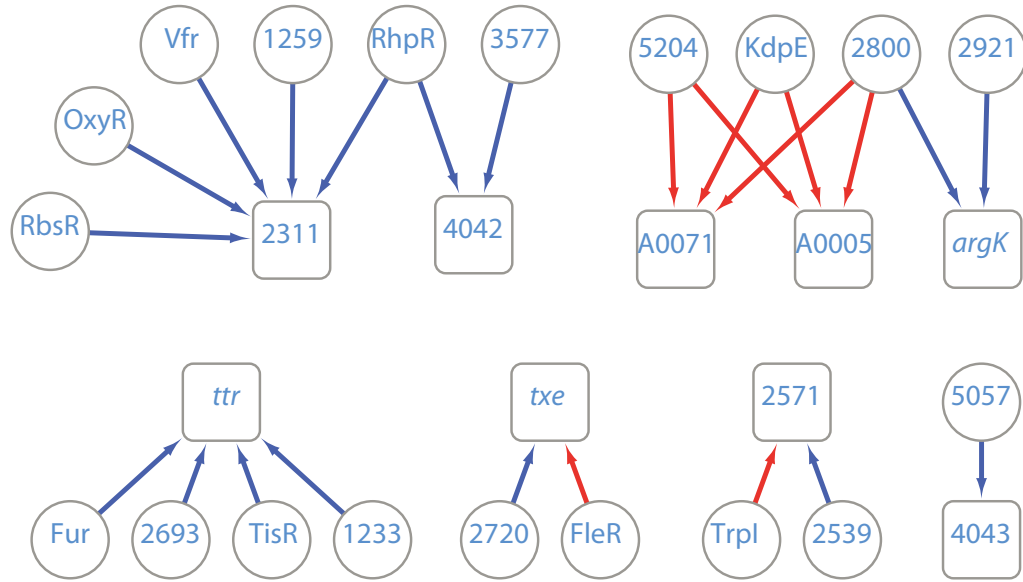

f. Transcriptional Regulatory Network of ROS

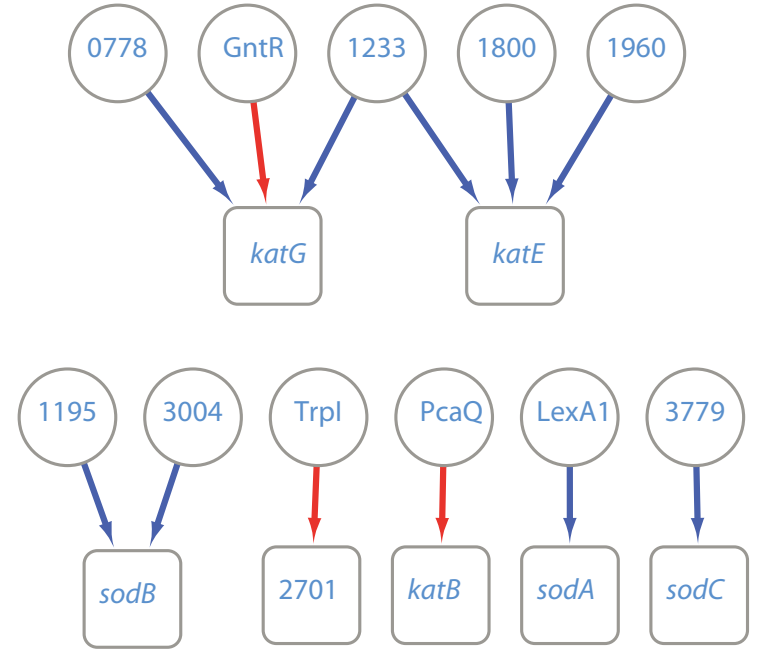

Supplement: 41467_2020_18744_MOESM6_ESM.pdf [file 41467_2020_18744_MOESM6_ESM.pdf]
